# Supplementary material for: Vitamin D deficiency in non-scarring and scarring alopecias: a systematic review and meta-analysis
Source: Frontiers journal article supplement (doi:10.3389/fnut.2024.1479337), 2024-10-02
Supplement: Table_1.pdf [file Table_1.pdf]

**Supplementary Table 1.** Search strategy

|                              | Search strategy                                                                                                                                                                                                                                                                                                                                                                                                                                                                        |
|------------------------------|----------------------------------------------------------------------------------------------------------------------------------------------------------------------------------------------------------------------------------------------------------------------------------------------------------------------------------------------------------------------------------------------------------------------------------------------------------------------------------------|
| PubMed<br>(N = 455)          | <ol style="list-style-type: none"> <li>1. "alopecia"[MeSH Terms] OR "alopecia"[All Fields] OR ("hair"[All Fields] AND "loss"[All Fields]) OR "hair loss"[All Fields] OR "baldness"[All Fields] OR "balding"[All Fields]</li> <li>2. "vitamin d"[MeSH Terms] OR "vitamin d"[All Fields] OR "ergocalciferols"[MeSH Terms] OR "ergocalciferols"[All Fields]</li> <li>3. "vitamin d deficiency"[MeSH Terms] OR "vitamin d deficiency"[All Fields]</li> <li>4. #1 AND (#2 OR #3)</li> </ol> |
| Embase<br>(N = 1871)         | <ol style="list-style-type: none"> <li>1. 'alopecia'/exp OR alopecia</li> <li>2. 'hair loss'/exp OR 'hair loss'</li> <li>3. 'vitamin d'/exp OR 'vitamin d'</li> <li>4. 'vitamin d deficiency'/exp OR 'vitamin d deficiency'</li> <li>5. (#1 OR #2) AND (#3 OR #4)</li> </ol>                                                                                                                                                                                                           |
| Scopus<br>(N = 1129)         | <ol style="list-style-type: none"> <li>1. TITLE-ABS-KEY ( alopecia OR "hair loss" OR baldness OR balding)</li> <li>2. TITLE-ABS-KEY ( “vitamin d” OR "vitamin d deficiency")</li> <li>3. 1 AND 2</li> </ol>                                                                                                                                                                                                                                                                            |
| Cochrane Library<br>(N = 45) | <ol style="list-style-type: none"> <li>1. alopecia OR "hair loss" OR baldness OR balding</li> <li>2. "vitamin d" OR "vitamin d deficiency"</li> <li>3. 1 AND 2</li> </ol>                                                                                                                                                                                                                                                                                                              |

**Supplementary Table 2.** PICO framework

|               |                                                                                                                        |
|---------------|------------------------------------------------------------------------------------------------------------------------|
| <b>PICO 1</b> | <b>Are patients with alopecia more likely to have VDD or lower vitamin D levels than individuals without alopecia?</b> |
| Population    | Adult or pediatric population with and without alopecia                                                                |
| Intervention  | Certain alopecia disorder*                                                                                             |
| Comparator    | Control without alopecia                                                                                               |
| Outcomes      | VDD <sup>†</sup> or vitamin D level                                                                                    |
| <b>PICO 2</b> | <b>What is the prevalence of VDD among patients with certain alopecia disorders?</b>                                   |
| Population    | Adult or pediatric population with certain alopecia disorders*                                                         |
| Intervention  | Not applicable                                                                                                         |
| Comparator    | Not applicable                                                                                                         |
| Outcomes      | VDD <sup>†</sup>                                                                                                       |
| <b>PICO 3</b> | <b>Does the vitamin D level or VDD have a correlation with the severity of particular alopecia disorders?</b>          |
| Population    | Adult or pediatric population with certain alopecia disorders*                                                         |
| Intervention  | High severity of alopecia                                                                                              |
| Comparator    | Low severity of alopecia                                                                                               |
| Outcomes      | vitamin D level                                                                                                        |

VDD, Vitamin D deficiency

\* Alopecia disorders, including but not limited to the following: non-scarring alopecia (alopecia areata, androgenetic alopecia, and telogen effluvium) and scarring alopecia (lichen planopilaris, frontal fibrosing alopecia, and central centrifugal cicatricial alopecia).

<sup>†</sup> VDD is defined as either < 20 ng/mL or < 10 ng/mL

**Supplementary Table 3.** The quality assessment of studies included in the systematic review

| Comparative studies                                 | Case           |                        | Control       |                | Comparability |                | Exposure           |                 |                      | Overall quality score |
|-----------------------------------------------------|----------------|------------------------|---------------|----------------|---------------|----------------|--------------------|-----------------|----------------------|-----------------------|
| Study name                                          | Definition (*) | Representativeness (*) | Selection (*) | Definition (*) | Age (*)       | Additional (*) | Ascertainment (**) | Same method (*) | Nonresponse rate (*) |                       |
| Wang et al. (2024) <sup>86</sup>                    | *              | ?                      | ?             | *              | *             | -              | **                 | *               | *                    | 7                     |
| Hasanbeyzade and Tunca (2024) <sup>68</sup>         | *              | ?                      | -             | *              | *             | -              | **                 | *               | *                    | 7                     |
| AbdElneam et al. (2024) <sup>63</sup>               | *              | ?                      | ?             | *              | *             | -              | **                 | *               | *                    | 7                     |
| Wu et al. (2023) <sup>85</sup>                      | *              | ?                      | ?             | *              | *             | *              | *                  | *               | *                    | 7                     |
| Saleem et al. (2023) <sup>69</sup>                  | *              | ?                      | ?             | *              | *             | -              | **                 | *               | *                    | 7                     |
| Leung et al. (2023) <sup>100</sup>                  | *              | *                      | *             | *              | *             | *              | ?                  | *               | *                    | 8                     |
| Hailat et al. (2023) <sup>82</sup>                  | *              | ?                      | ?             | *              | *             | -              | ?                  | *               | *                    | 5                     |
| Gupta et al. (2023) <sup>66</sup>                   | *              | ?                      | ?             | *              | *             | *              | **                 | *               | *                    | 8                     |
| Alsenaid et al. (2023) <sup>64</sup>                | *              | ?                      | ?             | *              | *             | *              | **                 | *               | *                    | 8                     |
| Das (2022) <sup>26</sup>                            | *              | ?                      | ?             | *              | *             | -              | **                 | *               | *                    | 7                     |
| deQueiroz et al. (2022) <sup>27</sup>               | *              | *                      | -             | *              | -             | -              | **                 | *               | *                    | 6                     |
| Gao et al. (2022) <sup>28</sup>                     | *              | *                      | ?             | *              | *             | -              | ?                  | *               | *                    | 6                     |
| Krysiak et al. (2022) <sup>71</sup>                 | *              | *                      | ?             | *              | *             | *              | ?                  | *               | *                    | 7                     |
| Tran et al. (2022) <sup>16</sup>                    | -              | ?                      | ?             | ?              | *             | *              | *                  | *               | *                    | 5                     |
| Abedini et al. (2021) <sup>32</sup>                 | *              | ?                      | ?             | *              | *             | *              | **                 | *               | *                    | 8                     |
| Alizadeh et al. (2021) <sup>88</sup>                | *              | ?                      | ?             | *              | *             | *              | **                 | *               | *                    | 8                     |
| El-Tahlawy et al. (2021) <sup>73</sup>              | *              | ?                      | ?             | *              | *             | *              | **                 | *               | *                    | 8                     |
| Jasim et al. (2021) <sup>74</sup>                   | *              | ?                      | ?             | *              | *             | -              | **                 | *               | *                    | 7                     |
| Lizarondo et al. (2021) <sup>35</sup>               | *              | ?                      | ?             | *              | *             | *              | **                 | *               | *                    | 8                     |
| Naser et al. (2021) <sup>89</sup>                   | *              | ?                      | ?             | *              | *             | *              | **                 | *               | *                    | 8                     |
| Conic et al. (2020) <sup>36</sup>                   | -              | *                      | -             | -              | *             | *              | *                  | *               | *                    | 7                     |
| Mohammad et al. (2020) <sup>90</sup>                | *              | -                      | -             | *              | *             | *              | **                 | *               | *                    | 8                     |
| Sanke et al. (2020) <sup>76</sup>                   | *              | ?                      | -             | *              | *             | *              | **                 | *               | *                    | 8                     |
| Zhao et al. (2020) <sup>14</sup>                    | *              | *                      | ?             | *              | *             | *              | **                 | *               | *                    | 9                     |
| El-Ghareeb (2019) <sup>38</sup>                     | *              | ?                      | ?             | *              | *             | -              | ?                  | *               | *                    | 5                     |
| Kondrakhina et al. (2019) <sup>77</sup>             | *              | ?                      | ?             | *              | *             | *              | **                 | *               | *                    | 8                     |
| Marahatta et al. (2019) <sup>39</sup>               | *              | *                      | ?             | *              | *             | *              | **                 | *               | *                    | 9                     |
| Namdar and Arian (2019) <sup>40</sup>               | *              | ?                      | ?             | *              | -             | -              | **                 | *               | *                    | 6                     |
| Rehman et al. (2019) <sup>41</sup>                  | *              | ?                      | ?             | *              | *             | *              | **                 | *               | *                    | 8                     |
| Siddappa et al. (2019) – adult AA <sup>42</sup>     | *              | ?                      | ?             | *              | *             | *              | **                 | *               | *                    | 8                     |
| Siddappa et al. (2019) – pediatric AA <sup>43</sup> | *              | ?                      | ?             | *              | *             | *              | **                 | *               | *                    | 8                     |
| Brankov et al. (2018) <sup>97</sup>                 | *              | *                      | -             | *              | *             | *              | **                 | *               | *                    | 9                     |
| Cifcia (2018) <sup>92</sup>                         | *              | ?                      | -             | *              | *             | *              | **                 | *               | *                    | 8                     |
| Daroach et al. (2018) <sup>44</sup>                 | *              | ?                      | ?             | *              | *             | *              | **                 | *               | *                    | 8                     |

| Comparative studies                     | Case           |                        | Control       |                | Comparability |                | Exposure           |                 |                      |                       |
|-----------------------------------------|----------------|------------------------|---------------|----------------|---------------|----------------|--------------------|-----------------|----------------------|-----------------------|
| Study name                              | Definition (*) | Representativeness (*) | Selection (*) | Definition (*) | Age (*)       | Additional (*) | Ascertainment (**) | Same method (*) | Nonresponse rate (*) | Overall quality score |
| Gade et al. (2018) <sup>45</sup>        | *              | ?                      | ?             | *              | *             | *              | **                 | *               | *                    | 8                     |
| Karaguzel et al. (2018) <sup>46</sup>   | *              | *                      | ?             | *              | *             | *              | **                 | *               | *                    | 9                     |
| Sanjee et al. (2018) <sup>15</sup>      | *              | *                      | -             | *              | *             | *              | **                 | *               | *                    | 9                     |
| Sarac and Koca (2018) <sup>78</sup>     | *              | *                      | ?             | *              | -             | -              | **                 | *               | *                    | 7                     |
| Unal and Gonulalan (2018) <sup>47</sup> | *              | ?                      | ?             | *              | -             | -              | **                 | *               | *                    | 6                     |
| Bhat et al. (2017) <sup>48</sup>        | *              | ?                      | -             | *              | *             | *              | **                 | *               | *                    | 8                     |
| Conic et al. (2017) <sup>49</sup>       | *              | *                      | -             | *              | *             | -              | **                 | *               | *                    | 8                     |
| Erpolat et al. (2017) <sup>50</sup>     | *              | ?                      | ?             | *              | -             | -              | **                 | *               | *                    | 6                     |
| Ghafoor and Anwar (2017) <sup>51</sup>  | *              | ?                      | -             | *              | *             | *              | **                 | *               | *                    | 8                     |
| Gurel et al. (2017) <sup>93</sup>       | *              | ?                      | ?             | *              | *             | *              | **                 | *               | *                    | 8                     |
| Attawa et al. (2016) <sup>53</sup>      | *              | ?                      | ?             | *              | -             | -              | **                 | *               | *                    | 6                     |
| Bakry et al. (2016) <sup>54</sup>       | *              | ?                      | ?             | *              | *             | *              | **                 | *               | *                    | 8                     |
| Banihashemi et al. (2016) <sup>79</sup> | *              | ?                      | ?             | *              | *             | *              | **                 | *               | *                    | 6                     |
| Darwish et al. (2016) <sup>55</sup>     | *              | ?                      | ?             | *              | *             | *              | **                 | *               | *                    | 8                     |
| Fattah and Darwish (2015) <sup>56</sup> | *              | *                      | ?             | *              | *             | *              | **                 | *               | *                    | 9                     |
| Ogrum et al. (2015) <sup>57</sup>       | *              | ?                      | ?             | *              | *             | *              | **                 | *               | *                    | 8                     |
| Cerman et al. (2014) <sup>13</sup>      | *              | *                      | ?             | *              | *             | *              | **                 | *               | *                    | 9                     |
| Mahamid et al. (2014) <sup>58</sup>     | *              | *                      | -             | -              | *             | *              | **                 | *               | *                    | 8                     |
| Moneib et al. (2014) <sup>80</sup>      | *              | ?                      | ?             | *              | *             | *              | **                 | *               | *                    | 8                     |
| D'Ovidio et al. (2013) <sup>59</sup>    | *              | ?                      | ?             | ?              | -             | -              | **                 | *               | *                    | 5                     |
| El-Mongy et al. (2013) <sup>60</sup>    | *              | ?                      | ?             | *              | -             | -              | **                 | *               | *                    | 6                     |
| Nassiri et al. (2013) <sup>61</sup>     | *              | ?                      | ?             | *              | -             | -              | **                 | *               | *                    | 6                     |
| Rasheed et al. (2013) <sup>81</sup>     | *              | ?                      | ?             | *              | *             | *              | **                 | *               | *                    | 8                     |
| Yilmaz et al. (2012) <sup>62</sup>      | *              | ?                      | ?             | *              | -             | -              | **                 | *               | *                    | 6                     |
| Karadag et al. (2011) <sup>95</sup>     | *              | ?                      | -             | -              | -             | *              | **                 | *               | *                    | 7                     |

| Descriptive studies                       | Sample                 |                 |                     | Exposure           | Comparability |                | Outcome         |                |                       |
|-------------------------------------------|------------------------|-----------------|---------------------|--------------------|---------------|----------------|-----------------|----------------|-----------------------|
| Study name                                | Representativeness (*) | Sample size (*) | Non-respondents (*) | Ascertainment (**) | Age (*)       | Additional (*) | Assessment (**) | Statistics (*) | Overall quality score |
| Losoya-Jaquez et al. (2024) <sup>25</sup> | *                      | -               | *                   | **                 | *             | *              | ?               | *              | 7                     |
| Vandana et al. (2023) <sup>84</sup>       | ?                      | *               | *                   | **                 | *             | -              | ?               | *              | 6                     |
| Okhovat et al. (2023) <sup>83</sup>       | *                      | *               | *                   | **                 | *             | -              | ?               | *              | 7                     |
| Hamidpour et al. (2023) <sup>67</sup>     | *                      | *               | *                   | **                 | *             | *              | ?               | *              | 8                     |
| Gharaei Nejad et al. (2023) <sup>98</sup> | *                      | *               | *                   | **                 | *             | *              | ?               | *              | 8                     |
| Fahim et al. (2023) <sup>65</sup>         | ?                      | *               | *                   | **                 | *             | -              | ?               | *              | 6                     |
| Arslan et al. (2023) <sup>96</sup>        | *                      | *               | *                   | **                 | *             | -              | ?               | *              | 7                     |
| Arasu et al. (2022) <sup>70</sup>         | ?                      | *               | *                   | ?                  | *             | *              | ?               | *              | 5                     |
| Chen et al. (2022) <sup>24</sup>          | *                      | *               | *                   | *                  | *             | *              | ?               | *              | 7                     |
| Collins et al. (2022) <sup>99</sup>       | *                      | -               | *                   | **                 | -             | *              | ?               | *              | 6                     |
| Goksin (2022) <sup>29</sup>               | *                      | *               | *                   | *                  | *             | -              | ?               | *              | 6                     |
| Lim et al. (2022) <sup>30</sup>           | *                      | *               | *                   | *                  | *             | *              | ?               | *              | 7                     |
| Oner and Akdeniz (2022) <sup>31</sup>     | *                      | *               | *                   | **                 | *             | -              | **              | *              | 9                     |
| Yorulmaz et al. (2022) <sup>87</sup>      | *                      | *               | *                   | **                 | *             | -              | ?               | *              | 7                     |
| Alamoudi et al. (2021) <sup>33</sup>      | *                      | *               | *                   | *                  | *             | -              | ?               | *              | 6                     |
| Conic et al. (2021) <sup>34</sup>         | *                      | *               | *                   | *                  | *             | *              | ?               | *              | 7                     |
| Danane et al. (2021) <sup>72</sup>        | ?                      | *               | *                   | **                 | *             | -              | ?               | -              | 5                     |
| Kerkemeyer et al. (2021) <sup>75</sup>    | *                      | *               | *                   | **                 | *             | *              | ?               | *              | 8                     |
| Sokmen (2020) <sup>91</sup>               | *                      | *               | *                   | **                 | *             | -              | ?               | *              | 7                     |
| Conic et al. (2019) <sup>37</sup>         | *                      | *               | *                   | **                 | *             | *              | ?               | *              | 8                     |
| Narang et al. (2017) <sup>52</sup>        | *                      | -               | *                   | *                  | *             | -              | ?               | *              | 5                     |
| Cheung et al. (2016) <sup>94</sup>        | *                      | *               | *                   | **                 | -             | *              | ?               | *              | 7                     |

**Supplementary Table 4.** Characteristics and main findings of studies included in the meta-analysis

|                             |                                                                                                                                                                                                                                                                                                                                                                                                                                                                                                                                                                                                                                                                                                                                                                                           |                                                                                                                                                                                                                                                                                                                                                                                                                                                                                                                                                                                                                                                                                                                                                                                               |
|-----------------------------|-------------------------------------------------------------------------------------------------------------------------------------------------------------------------------------------------------------------------------------------------------------------------------------------------------------------------------------------------------------------------------------------------------------------------------------------------------------------------------------------------------------------------------------------------------------------------------------------------------------------------------------------------------------------------------------------------------------------------------------------------------------------------------------------|-----------------------------------------------------------------------------------------------------------------------------------------------------------------------------------------------------------------------------------------------------------------------------------------------------------------------------------------------------------------------------------------------------------------------------------------------------------------------------------------------------------------------------------------------------------------------------------------------------------------------------------------------------------------------------------------------------------------------------------------------------------------------------------------------|
| Wang et al. (2024)          |                                                                                                                                                                                                                                                                                                                                                                                                                                                                                                                                                                                                                                                                                                                                                                                           |                                                                                                                                                                                                                                                                                                                                                                                                                                                                                                                                                                                                                                                                                                                                                                                               |
| Study characteristics       | <ul style="list-style-type: none"> <li>• Study type: case-control, single-center study</li> <li>• Study duration: N/A</li> <li>• Country: China</li> </ul>                                                                                                                                                                                                                                                                                                                                                                                                                                                                                                                                                                                                                                |                                                                                                                                                                                                                                                                                                                                                                                                                                                                                                                                                                                                                                                                                                                                                                                               |
| Participant characteristics | <ul style="list-style-type: none"> <li>• No. of subjects: 40 MAGA</li> <li>• Age: <math>27.3 \pm 5.3</math> years</li> <li>• Gender: Male 40 (100%)</li> <li>• Ethnicity: N/A</li> <li>• BMI: <math>25.55 \pm 3.45</math> kg/cm<sup>2</sup></li> <li>• Comorbidity: N/A</li> <li>• Smoking: N/A</li> <li>• Alcohol: N/A</li> <li>• Skin type: N/A</li> <li>• Diet: N/A</li> <li>• Sun-exposure/ sunscreen usage: N/A</li> <li>• Disease duration: N/A</li> <li>• Disease severity score/ grading: N/A</li> <li>• Alopecia pattern: N/A</li> <li>• FH of alopecia: N/A</li> <li>• Nail involvement: N/A</li> <li>• First/ recurrent episode: N/A</li> <li>• Stable/ active disease: N/A</li> <li>• Treatment information: N/A</li> <li>• Diagnosis and severity assessment: N/A</li> </ul> | <ul style="list-style-type: none"> <li>• No. of subjects: 45 controls</li> <li>• Age: <math>28.3 \pm 4.2</math> years</li> <li>• Gender: Male 40 (100%)</li> <li>• Ethnicity: N/A</li> <li>• BMI: <math>24.67 \pm 2.78</math> kg/cm<sup>2</sup></li> <li>• Comorbidity: N/A</li> <li>• Smoking: N/A</li> <li>• Alcohol: N/A</li> <li>• Skin type: N/A</li> <li>• Diet: N/A</li> <li>• Sun-exposure/ sunscreen usage: N/A</li> <li>• Disease duration: N/A</li> <li>• Disease severity score/ grading: N/A</li> <li>• Alopecia pattern: N/A</li> <li>• FH of alopecia: N/A</li> <li>• Nail involvement: N/A</li> <li>• First/ recurrent episode: N/A</li> <li>• Stable/ active disease: N/A</li> <li>• Treatment information: N/A</li> <li>• Diagnosis and severity assessment: N/A</li> </ul> |
| Vitamin D data              | <ul style="list-style-type: none"> <li>• VDD: N/A</li> <li>• Level: <math>21.08 \pm 9.18</math> ng/mL</li> <li>• Correlation: N/A</li> </ul>                                                                                                                                                                                                                                                                                                                                                                                                                                                                                                                                                                                                                                              | <ul style="list-style-type: none"> <li>• VDD: N/A</li> <li>• Level: <math>26.67 \pm 8.51</math> ng/mL</li> <li>• Correlation: N/A</li> </ul>                                                                                                                                                                                                                                                                                                                                                                                                                                                                                                                                                                                                                                                  |
| Vitamin D measurement       | <ul style="list-style-type: none"> <li>• Definition: N/A</li> <li>• Measurement method: Chemiluminescence immunoassay method using ADVIA Chemistry XPT system (Siemens, Japan)</li> </ul>                                                                                                                                                                                                                                                                                                                                                                                                                                                                                                                                                                                                 |                                                                                                                                                                                                                                                                                                                                                                                                                                                                                                                                                                                                                                                                                                                                                                                               |
| Other                       |                                                                                                                                                                                                                                                                                                                                                                                                                                                                                                                                                                                                                                                                                                                                                                                           |                                                                                                                                                                                                                                                                                                                                                                                                                                                                                                                                                                                                                                                                                                                                                                                               |

| Losoya-Jaquez et al. (2024) |                                                                                                                                                                                                                                                                                                                                                                                                                                                                                                                                                                                                                                                                                                                                                                                                                                                                                                                                                                                                                               |
|-----------------------------|-------------------------------------------------------------------------------------------------------------------------------------------------------------------------------------------------------------------------------------------------------------------------------------------------------------------------------------------------------------------------------------------------------------------------------------------------------------------------------------------------------------------------------------------------------------------------------------------------------------------------------------------------------------------------------------------------------------------------------------------------------------------------------------------------------------------------------------------------------------------------------------------------------------------------------------------------------------------------------------------------------------------------------|
| Study characteristics       | <ul style="list-style-type: none"> <li>• Study type: retrospective, descriptive, multi-center study</li> <li>• Study duration: January 2008 to January 2023</li> <li>• Country: Mexico</li> </ul>                                                                                                                                                                                                                                                                                                                                                                                                                                                                                                                                                                                                                                                                                                                                                                                                                             |
| Participant characteristics | <ul style="list-style-type: none"> <li>• No. of subjects: 145 pediatric AGA (13 with vitamin D results)</li> <li>• Age: <math>16.08 \pm 1.30</math> years</li> <li>• Gender: 103 males and 42 females (71 and 21%, respectively)</li> <li>• Ethnicity: N/A</li> <li>• BMI: N/A</li> <li>• Comorbidity: 17 (50%) acne, 8 (23.3%) seborrheic dermatitis, 6 (17.5%) IR, 2 (6%) obesity, 1 (3%) atopic dermatitis</li> <li>• Smoking: N/A</li> <li>• Alcohol: N/A</li> <li>• Skin type: N/A</li> <li>• Diet: N/A</li> <li>• Sun-exposure/ sunscreen usage: N/A</li> <li>• Disease duration: N/A</li> <li>• Disease severity score/ grading: N/A</li> <li>• Alopecia pattern: N/A</li> <li>• FH of alopecia: N/A</li> <li>• Nail involvement: N/A</li> <li>• First/ recurrent episode: N/A</li> <li>• Stable/ active disease: N/A</li> <li>• Treatment information: 34 (23.4%) topical minoxidil, 3 (2.0%) finasteride, 2 (1.3%) dutasteride, 2 (1.3%) spironolactone</li> <li>• Diagnosis and severity assessment: N/A</li> </ul> |
| Vitamin D data              | <ul style="list-style-type: none"> <li>• VDD: 11/13 (84%)</li> <li>• Level: N/A</li> <li>• Correlation: N/A</li> </ul>                                                                                                                                                                                                                                                                                                                                                                                                                                                                                                                                                                                                                                                                                                                                                                                                                                                                                                        |
| Vitamin D measurement       | <ul style="list-style-type: none"> <li>• Definition: N/A</li> <li>• Measurement method: N/A</li> </ul>                                                                                                                                                                                                                                                                                                                                                                                                                                                                                                                                                                                                                                                                                                                                                                                                                                                                                                                        |
| Other                       |                                                                                                                                                                                                                                                                                                                                                                                                                                                                                                                                                                                                                                                                                                                                                                                                                                                                                                                                                                                                                               |

| Hasanbeyzade and Tunca (2024) |                                                                                                                                                                                                                                                                                                                                                                                                                                                                                                                                                                                                                                                                                                                                                                                                                                                                              |                                                                                                                                                                                                                                                                                                                                                                                                                                                                                                                                                                                                                                                                                                                                                                                                      |
|-------------------------------|------------------------------------------------------------------------------------------------------------------------------------------------------------------------------------------------------------------------------------------------------------------------------------------------------------------------------------------------------------------------------------------------------------------------------------------------------------------------------------------------------------------------------------------------------------------------------------------------------------------------------------------------------------------------------------------------------------------------------------------------------------------------------------------------------------------------------------------------------------------------------|------------------------------------------------------------------------------------------------------------------------------------------------------------------------------------------------------------------------------------------------------------------------------------------------------------------------------------------------------------------------------------------------------------------------------------------------------------------------------------------------------------------------------------------------------------------------------------------------------------------------------------------------------------------------------------------------------------------------------------------------------------------------------------------------------|
| Study characteristics         | <ul style="list-style-type: none"> <li>• Study type: prospective, case-control, single-center study</li> <li>• Study duration: 8 March 2016 and 31 May 2016</li> <li>• Country: Turkey</li> </ul>                                                                                                                                                                                                                                                                                                                                                                                                                                                                                                                                                                                                                                                                            |                                                                                                                                                                                                                                                                                                                                                                                                                                                                                                                                                                                                                                                                                                                                                                                                      |
| Participant characteristics   | <ul style="list-style-type: none"> <li>• No. of subjects: 41 AA</li> <li>• Age: <math>26.8 \pm 7</math> years</li> <li>• Gender: 6 (14.6%) female and 35 (85.4%) males</li> <li>• Ethnicity: N/A</li> <li>• BMI: N/A</li> <li>• Comorbidity: 8 (19.5%) additional autoimmune diseases</li> <li>• Smoking: N/A</li> <li>• Alcohol: N/A</li> <li>• Skin type: N/A</li> <li>• Diet: N/A</li> <li>• Sun-exposure/ sunscreen usage: N/A</li> <li>• Disease duration: N/A</li> <li>• Disease severity score/ grading: N/A</li> <li>• Alopecia pattern: AT 10 (24.4%), AU 9 (22.0%), patchy AA 11 (26.8%), diffuse AA 11 (26.8%)</li> <li>• FH of alopecia: N/A</li> <li>• Nail involvement: N/A</li> <li>• First/ recurrent episode: N/A</li> <li>• Stable/ active disease: N/A</li> <li>• Treatment information: N/A</li> <li>• Diagnosis and severity assessment: N/A</li> </ul> | <ul style="list-style-type: none"> <li>• No. of subjects: 41 controls (age- and gender-matched)</li> <li>• Age: <math>26.9 \pm 6.9</math> years</li> <li>• Gender: 5 (12.2%) female and 36 (87.8%) males</li> <li>• Ethnicity: N/A</li> <li>• BMI: N/A</li> <li>• Comorbidity: N/A</li> <li>• Smoking: N/A</li> <li>• Alcohol: N/A</li> <li>• Skin type: N/A</li> <li>• Diet: N/A</li> <li>• Sun-exposure/ sunscreen usage: N/A</li> <li>• Disease duration: N/A</li> <li>• Disease severity score/ grading: N/A</li> <li>• Alopecia pattern: N/A</li> <li>• FH of alopecia: N/A</li> <li>• Nail involvement: N/A</li> <li>• First/ recurrent episode: N/A</li> <li>• Stable/ active disease: N/A</li> <li>• Treatment information: N/A</li> <li>• Diagnosis and severity assessment: N/A</li> </ul> |
| Vitamin D data                | <ul style="list-style-type: none"> <li>• VDD: 10 (24.4%)</li> <li>• Level: <math>32.1 \pm 19.5</math> ng/ml</li> <li>• Correlation: N/A</li> </ul>                                                                                                                                                                                                                                                                                                                                                                                                                                                                                                                                                                                                                                                                                                                           | <ul style="list-style-type: none"> <li>• VDD: 4 (9.8%)</li> <li>• Level: <math>39.6 \pm 15.7</math> ng/ml</li> <li>• Correlation: N/A</li> </ul>                                                                                                                                                                                                                                                                                                                                                                                                                                                                                                                                                                                                                                                     |
| Vitamin D measurement         | <ul style="list-style-type: none"> <li>• Definition: VDD &lt; 20 ng/ml</li> <li>• Measurement method: vitamin D measurement was made by liquid chromatography mass spectrometry (Liquid Chromatography Mass Spectrometry/ Mass Spectrometry: LC-MS/MS) method</li> </ul>                                                                                                                                                                                                                                                                                                                                                                                                                                                                                                                                                                                                     |                                                                                                                                                                                                                                                                                                                                                                                                                                                                                                                                                                                                                                                                                                                                                                                                      |
| Other                         |                                                                                                                                                                                                                                                                                                                                                                                                                                                                                                                                                                                                                                                                                                                                                                                                                                                                              |                                                                                                                                                                                                                                                                                                                                                                                                                                                                                                                                                                                                                                                                                                                                                                                                      |



|                             |                                                                                                                                                                                                                                                                                                                                                                                                                                                                                                                                                                                                                                                                                                                                                                                                                         |                                                                                                                                                                                                                                                                                                                                                                                                                                                                                                                                                                                                                                                                                                                                                               |
|-----------------------------|-------------------------------------------------------------------------------------------------------------------------------------------------------------------------------------------------------------------------------------------------------------------------------------------------------------------------------------------------------------------------------------------------------------------------------------------------------------------------------------------------------------------------------------------------------------------------------------------------------------------------------------------------------------------------------------------------------------------------------------------------------------------------------------------------------------------------|---------------------------------------------------------------------------------------------------------------------------------------------------------------------------------------------------------------------------------------------------------------------------------------------------------------------------------------------------------------------------------------------------------------------------------------------------------------------------------------------------------------------------------------------------------------------------------------------------------------------------------------------------------------------------------------------------------------------------------------------------------------|
| AbdElneam et al. (2024)     |                                                                                                                                                                                                                                                                                                                                                                                                                                                                                                                                                                                                                                                                                                                                                                                                                         |                                                                                                                                                                                                                                                                                                                                                                                                                                                                                                                                                                                                                                                                                                                                                               |
| Study characteristics       | <ul style="list-style-type: none"> <li>• Study type: retrospective, case-control, single-center study</li> <li>• Study duration: N/A</li> <li>• Country: Saudi Arabia</li> </ul>                                                                                                                                                                                                                                                                                                                                                                                                                                                                                                                                                                                                                                        |                                                                                                                                                                                                                                                                                                                                                                                                                                                                                                                                                                                                                                                                                                                                                               |
| Participant characteristics | <ul style="list-style-type: none"> <li>• No. of subjects: 82 AA</li> <li>• Age: <math>25 \pm 3.9</math> years</li> <li>• Gender: Female 40 (48.8%)</li> <li>• Ethnicity: N/A</li> <li>• BMI: N/A</li> <li>• Comorbidity: N/A</li> <li>• Smoking: N/A</li> <li>• Alcohol: N/A</li> <li>• Skin type: N/A</li> <li>• Diet: N/A</li> <li>• Sun-exposure/ sunscreen usage: N/A</li> <li>• Disease duration: N/A</li> <li>• Disease severity score/ grading: Localized patchy 38 (46.4%), Multiple patchy 31 (37.8%), Ophiasis 13 (15.8%)</li> <li>• Alopecia pattern: N/A</li> <li>• FH of alopecia: N/A</li> <li>• Nail involvement: N/A</li> <li>• First/ recurrent episode: N/A</li> <li>• Stable/ active disease: N/A</li> <li>• Treatment information: N/A</li> <li>• Diagnosis and severity assessment: N/A</li> </ul> | <ul style="list-style-type: none"> <li>• No. of subjects: 81 controls (age-matched)</li> <li>• Age: <math>23.8 \pm 2.8</math> years</li> <li>• Gender: 45 (55.6%)</li> <li>• Ethnicity: N/A</li> <li>• BMI: N/A</li> <li>• Comorbidity: N/A</li> <li>• Smoking: N/A</li> <li>• Alcohol: N/A</li> <li>• Skin type: N/A</li> <li>• Diet: N/A</li> <li>• Sun-exposure/ sunscreen usage: N/A</li> <li>• Disease duration: N/A</li> <li>• Disease severity score/ grading: N/A</li> <li>• Alopecia pattern: N/A</li> <li>• FH of alopecia: N/A</li> <li>• Nail involvement: N/A</li> <li>• First/ recurrent episode: N/A</li> <li>• Stable/ active disease: N/A</li> <li>• Treatment information: N/A</li> <li>• Diagnosis and severity assessment: N/A</li> </ul> |
| Vitamin D data              | <ul style="list-style-type: none"> <li>• VDD: N/A</li> <li>• Level: <math>12.9 \pm 3.9</math> ng/mL</li> <li>• Correlation: N/A</li> </ul>                                                                                                                                                                                                                                                                                                                                                                                                                                                                                                                                                                                                                                                                              | <ul style="list-style-type: none"> <li>• VDD: N/A</li> <li>• Level: <math>20 \pm 2.7</math> ng/mL</li> <li>• Correlation: N/A</li> </ul>                                                                                                                                                                                                                                                                                                                                                                                                                                                                                                                                                                                                                      |
| Vitamin D measurement       | <ul style="list-style-type: none"> <li>• Definition: N/A</li> <li>• Measurement method: Roche Cobas e411 system from Roche Diagnostics, Switzerland</li> </ul>                                                                                                                                                                                                                                                                                                                                                                                                                                                                                                                                                                                                                                                          |                                                                                                                                                                                                                                                                                                                                                                                                                                                                                                                                                                                                                                                                                                                                                               |
| Other                       |                                                                                                                                                                                                                                                                                                                                                                                                                                                                                                                                                                                                                                                                                                                                                                                                                         |                                                                                                                                                                                                                                                                                                                                                                                                                                                                                                                                                                                                                                                                                                                                                               |

|                             |                                                                                                                                                                                                                                                                                                                                                                                                                                                                                                                                                                                                                                                                                                                                                                                                                                                                        |                                                                                                                                                                                                                                                                                                                                                                                                                                                                                                                                                                                                                                                                                                                                                                                                                                |
|-----------------------------|------------------------------------------------------------------------------------------------------------------------------------------------------------------------------------------------------------------------------------------------------------------------------------------------------------------------------------------------------------------------------------------------------------------------------------------------------------------------------------------------------------------------------------------------------------------------------------------------------------------------------------------------------------------------------------------------------------------------------------------------------------------------------------------------------------------------------------------------------------------------|--------------------------------------------------------------------------------------------------------------------------------------------------------------------------------------------------------------------------------------------------------------------------------------------------------------------------------------------------------------------------------------------------------------------------------------------------------------------------------------------------------------------------------------------------------------------------------------------------------------------------------------------------------------------------------------------------------------------------------------------------------------------------------------------------------------------------------|
| Wu et al. (2023)            |                                                                                                                                                                                                                                                                                                                                                                                                                                                                                                                                                                                                                                                                                                                                                                                                                                                                        |                                                                                                                                                                                                                                                                                                                                                                                                                                                                                                                                                                                                                                                                                                                                                                                                                                |
| Study characteristics       | <ul style="list-style-type: none"> <li>• Study type: retrospective, case-control, single-center study</li> <li>• Study duration: N/A</li> <li>• Country: China</li> </ul>                                                                                                                                                                                                                                                                                                                                                                                                                                                                                                                                                                                                                                                                                              |                                                                                                                                                                                                                                                                                                                                                                                                                                                                                                                                                                                                                                                                                                                                                                                                                                |
| Participant characteristics | <ul style="list-style-type: none"> <li>• No. of subjects: 80 MAGA</li> <li>• Age: <math>36.28 \pm 10.49</math> years</li> <li>• Gender: Male 80 (100%)</li> <li>• Ethnicity: N/A</li> <li>• BMI: <math>4.29 \pm 2.41</math> kg/m<sup>2</sup></li> <li>• Comorbidity: N/A</li> <li>• Smoking: N/A</li> <li>• Alcohol: N/A</li> <li>• Skin type: N/A</li> <li>• Diet: N/A</li> <li>• Sun-exposure/ sunscreen usage: N/A</li> <li>• Disease duration: N/A</li> <li>• Disease severity score/ grading: Mild 36 (45%), moderate alopecia 37 (46.3%), severe alopecia 7 (0.09%) patients</li> <li>• Alopecia pattern: N/A</li> <li>• FH of alopecia: N/A</li> <li>• Nail involvement: N/A</li> <li>• First/ recurrent episode: N/A</li> <li>• Stable/ active disease: N/A</li> <li>• Treatment information: N/A</li> <li>• Diagnosis and severity assessment: N/A</li> </ul> | <ul style="list-style-type: none"> <li>• No. of subjects: 60 controls (age-, gender- and BMI-matched)</li> <li>• Age: <math>36.28 \pm 10.98</math> years</li> <li>• Gender: male 60 (100%)</li> <li>• Ethnicity: N/A</li> <li>• BMI: <math>3.59 \pm 2.42</math> kg/m<sup>2</sup></li> <li>• Comorbidity: N/A</li> <li>• Smoking: N/A</li> <li>• Alcohol: N/A</li> <li>• Skin type: N/A</li> <li>• Diet: N/A</li> <li>• Sun-exposure/ sunscreen usage: N/A</li> <li>• Disease duration: N/A</li> <li>• Disease severity score/ grading: N/A</li> <li>• Alopecia pattern: N/A</li> <li>• FH of alopecia: N/A</li> <li>• Nail involvement: N/A</li> <li>• First/ recurrent episode: N/A</li> <li>• Stable/ active disease: N/A</li> <li>• Treatment information: N/A</li> <li>• Diagnosis and severity assessment: N/A</li> </ul> |
| Vitamin D data              | <ul style="list-style-type: none"> <li>• VDD: 19 (23.75%)</li> <li>• Level: <math>23.64 \pm 5.12</math> ng/mL</li> <li>• Correlation: N/A</li> </ul>                                                                                                                                                                                                                                                                                                                                                                                                                                                                                                                                                                                                                                                                                                                   | <ul style="list-style-type: none"> <li>• VDD: 10 (16.67%)</li> <li>• Level: <math>25.76 \pm 6.37</math> ng/mL</li> <li>• Correlation: N/A</li> </ul>                                                                                                                                                                                                                                                                                                                                                                                                                                                                                                                                                                                                                                                                           |
| Vitamin D measurement       | <ul style="list-style-type: none"> <li>• Definition: VDD &lt; 20 ng/mL, VDI 20-30 ng/mL</li> <li>• Measurement method: by the laboratories of Jinling hospital (unspecified)</li> </ul>                                                                                                                                                                                                                                                                                                                                                                                                                                                                                                                                                                                                                                                                                |                                                                                                                                                                                                                                                                                                                                                                                                                                                                                                                                                                                                                                                                                                                                                                                                                                |
| Other                       |                                                                                                                                                                                                                                                                                                                                                                                                                                                                                                                                                                                                                                                                                                                                                                                                                                                                        |                                                                                                                                                                                                                                                                                                                                                                                                                                                                                                                                                                                                                                                                                                                                                                                                                                |

|                             |                                                                                                                                                                                                                                                                                                                                                                                                                                                                                                                                                                                                                                                                                                                                                   |                                                                                                                                                                                                                                                                                                                                                                                                                                                                                                                                                                                                                                                                                                                                   |
|-----------------------------|---------------------------------------------------------------------------------------------------------------------------------------------------------------------------------------------------------------------------------------------------------------------------------------------------------------------------------------------------------------------------------------------------------------------------------------------------------------------------------------------------------------------------------------------------------------------------------------------------------------------------------------------------------------------------------------------------------------------------------------------------|-----------------------------------------------------------------------------------------------------------------------------------------------------------------------------------------------------------------------------------------------------------------------------------------------------------------------------------------------------------------------------------------------------------------------------------------------------------------------------------------------------------------------------------------------------------------------------------------------------------------------------------------------------------------------------------------------------------------------------------|
| Vandana et al. (2023)       |                                                                                                                                                                                                                                                                                                                                                                                                                                                                                                                                                                                                                                                                                                                                                   |                                                                                                                                                                                                                                                                                                                                                                                                                                                                                                                                                                                                                                                                                                                                   |
| Study characteristics       | <ul style="list-style-type: none"> <li>• Study type: Cross-sectional, descriptive, single-center study</li> <li>• Study duration: March 2013 and February 2020</li> <li>• Country: India</li> </ul>                                                                                                                                                                                                                                                                                                                                                                                                                                                                                                                                               |                                                                                                                                                                                                                                                                                                                                                                                                                                                                                                                                                                                                                                                                                                                                   |
| Participant characteristics | <ul style="list-style-type: none"> <li>• No. of subjects: 76 acute and chronic TE</li> <li>• Age: mean 24.4 years</li> <li>• Gender: Female 76 (100%)</li> <li>• Ethnicity: N/A</li> <li>• BMI: N/A</li> <li>• Comorbidity: N/A</li> <li>• Smoking: N/A</li> <li>• Alcohol: N/A</li> <li>• Skin type: N/A</li> <li>• Diet: N/A</li> <li>• Sun-exposure/ sunscreen usage: N/A</li> <li>• Disease duration: N/A</li> <li>• Disease severity score/ grading: N/A</li> <li>• Alopecia pattern: N/A</li> <li>• FH of alopecia: N/A</li> <li>• Nail involvement: N/A</li> <li>• First/ recurrent episode: N/A</li> <li>• Stable/ active disease: N/A</li> <li>• Treatment information: N/A</li> <li>• Diagnosis and severity assessment: N/A</li> </ul> | <ul style="list-style-type: none"> <li>• No. of subjects: 24 FPHL</li> <li>• Age: mean 28.9 years</li> <li>• Gender: Female 24 (100%)</li> <li>• Ethnicity: N/A</li> <li>• BMI: N/A</li> <li>• Comorbidity: N/A</li> <li>• Smoking: N/A</li> <li>• Alcohol: N/A</li> <li>• Skin type: N/A</li> <li>• Diet: N/A</li> <li>• Sun-exposure/ sunscreen usage: N/A</li> <li>• Disease duration: N/A</li> <li>• Disease severity score/ grading: N/A</li> <li>• Alopecia pattern: N/A</li> <li>• FH of alopecia: N/A</li> <li>• Nail involvement: N/A</li> <li>• First/ recurrent episode: N/A</li> <li>• Stable/ active disease: N/A</li> <li>• Treatment information: N/A</li> <li>• Diagnosis and severity assessment: N/A</li> </ul> |
| Vitamin D data              | <ul style="list-style-type: none"> <li>• VDD: 52 (68.4%)</li> <li>• Level: N/A</li> <li>• Correlation: N/A</li> </ul>                                                                                                                                                                                                                                                                                                                                                                                                                                                                                                                                                                                                                             | <ul style="list-style-type: none"> <li>• VDD: 18 (75%)</li> <li>• Level: N/A</li> <li>• Correlation: N/A</li> </ul>                                                                                                                                                                                                                                                                                                                                                                                                                                                                                                                                                                                                               |
| Vitamin D measurement       | <ul style="list-style-type: none"> <li>• Definition: VDD &lt; 20 ng/ml</li> <li>• Measurement method: N/A</li> </ul>                                                                                                                                                                                                                                                                                                                                                                                                                                                                                                                                                                                                                              |                                                                                                                                                                                                                                                                                                                                                                                                                                                                                                                                                                                                                                                                                                                                   |
| Other                       |                                                                                                                                                                                                                                                                                                                                                                                                                                                                                                                                                                                                                                                                                                                                                   |                                                                                                                                                                                                                                                                                                                                                                                                                                                                                                                                                                                                                                                                                                                                   |

|                             |                                                                                                                                                                                                                                                                                                                                                                                                                                                                                                                                                                                                                                                                                                                                                                                                                                        |                                                                                                                                                                                                                                                                                                                                                                                                                                                                                                                                                                                                                                                                                                                                                                                                   |
|-----------------------------|----------------------------------------------------------------------------------------------------------------------------------------------------------------------------------------------------------------------------------------------------------------------------------------------------------------------------------------------------------------------------------------------------------------------------------------------------------------------------------------------------------------------------------------------------------------------------------------------------------------------------------------------------------------------------------------------------------------------------------------------------------------------------------------------------------------------------------------|---------------------------------------------------------------------------------------------------------------------------------------------------------------------------------------------------------------------------------------------------------------------------------------------------------------------------------------------------------------------------------------------------------------------------------------------------------------------------------------------------------------------------------------------------------------------------------------------------------------------------------------------------------------------------------------------------------------------------------------------------------------------------------------------------|
| Saleem et al. (2023)        |                                                                                                                                                                                                                                                                                                                                                                                                                                                                                                                                                                                                                                                                                                                                                                                                                                        |                                                                                                                                                                                                                                                                                                                                                                                                                                                                                                                                                                                                                                                                                                                                                                                                   |
| Study characteristics       | <ul style="list-style-type: none"> <li>• Study type: case-control, single-center study</li> <li>• Study duration: October 2022 to July 2023</li> <li>• Country: Pakistan</li> </ul>                                                                                                                                                                                                                                                                                                                                                                                                                                                                                                                                                                                                                                                    |                                                                                                                                                                                                                                                                                                                                                                                                                                                                                                                                                                                                                                                                                                                                                                                                   |
| Participant characteristics | <ul style="list-style-type: none"> <li>• No. of subjects: 45 AA</li> <li>• Age: <math>22.94 \pm 7.92</math> years</li> <li>• Gender: male 27 (60%), female 18 (40%)</li> <li>• Ethnicity: N/A</li> <li>• BMI: N/A</li> <li>• Comorbidity: N/A</li> <li>• Smoking: N/A</li> <li>• Alcohol: N/A</li> <li>• Skin type: N/A</li> <li>• Diet: N/A</li> <li>• Sun-exposure/ sunscreen usage: N/A</li> <li>• Disease duration: N/A</li> <li>• Disease severity score/ grading: S1 7 (15.6%), S2 10 (22.2%), S3 18 (40%), S4 3 (6.7%), S5 7 (15.6%)</li> <li>• Alopecia pattern: N/A</li> <li>• FH of alopecia: 13 (28.9%)</li> <li>• Nail involvement: N/A</li> <li>• First/ recurrent episode: N/A</li> <li>• Stable/ active disease: N/A</li> <li>• Treatment information: N/A</li> <li>• Diagnosis and severity assessment: N/A</li> </ul> | <ul style="list-style-type: none"> <li>• No. of subjects: 45 controls (age- and sex-matched)</li> <li>• Age: <math>23.84 \pm 8.46</math> years</li> <li>• Gender: male 27 (60%), female 18 (40%)</li> <li>• Ethnicity: N/A</li> <li>• BMI: N/A</li> <li>• Comorbidity: N/A</li> <li>• Smoking: N/A</li> <li>• Alcohol: N/A</li> <li>• Skin type: N/A</li> <li>• Diet: N/A</li> <li>• Sun-exposure/ sunscreen usage: N/A</li> <li>• Disease duration: N/A</li> <li>• Disease severity score/ grading: N/A</li> <li>• Alopecia pattern: N/A</li> <li>• FH of alopecia: 4 (8.9%)</li> <li>• Nail involvement: N/A</li> <li>• First/ recurrent episode: N/A</li> <li>• Stable/ active disease: N/A</li> <li>• Treatment information: N/A</li> <li>• Diagnosis and severity assessment: N/A</li> </ul> |
| Vitamin D data              | <ul style="list-style-type: none"> <li>• VDD: N/A</li> <li>• Level: <math>14.6 \pm 17.9</math> ng/mL</li> <li>• Correlation: N/A</li> </ul>                                                                                                                                                                                                                                                                                                                                                                                                                                                                                                                                                                                                                                                                                            | <ul style="list-style-type: none"> <li>• VDD: N/A</li> <li>• Level: <math>23.2 \pm 15.32</math> ng/mL</li> <li>• Correlation: N/A</li> </ul>                                                                                                                                                                                                                                                                                                                                                                                                                                                                                                                                                                                                                                                      |
| Vitamin D measurement       | <ul style="list-style-type: none"> <li>• Definition: N/A</li> <li>• Measurement method: enzyme immunoassay for vitamin D on a chemical analyzer</li> </ul>                                                                                                                                                                                                                                                                                                                                                                                                                                                                                                                                                                                                                                                                             |                                                                                                                                                                                                                                                                                                                                                                                                                                                                                                                                                                                                                                                                                                                                                                                                   |
| Other                       |                                                                                                                                                                                                                                                                                                                                                                                                                                                                                                                                                                                                                                                                                                                                                                                                                                        |                                                                                                                                                                                                                                                                                                                                                                                                                                                                                                                                                                                                                                                                                                                                                                                                   |

|                             |                                                                                                                                                                                                                                                                                                                                                                                                                                                                                                                                                                                                                                                                                                                                                                                                                                                                 |
|-----------------------------|-----------------------------------------------------------------------------------------------------------------------------------------------------------------------------------------------------------------------------------------------------------------------------------------------------------------------------------------------------------------------------------------------------------------------------------------------------------------------------------------------------------------------------------------------------------------------------------------------------------------------------------------------------------------------------------------------------------------------------------------------------------------------------------------------------------------------------------------------------------------|
| Okhovat et al. (2023)       |                                                                                                                                                                                                                                                                                                                                                                                                                                                                                                                                                                                                                                                                                                                                                                                                                                                                 |
| Study characteristics       | <ul style="list-style-type: none"> <li>• Study type: retrospective, descriptive, single-center study</li> <li>• Study duration: October 2015 to February 2019</li> <li>• Country: USA</li> </ul>                                                                                                                                                                                                                                                                                                                                                                                                                                                                                                                                                                                                                                                                |
| Participant characteristics | <ul style="list-style-type: none"> <li>• No. of subjects: 367 FPHL (54 had vitamin D results at baseline)</li> <li>• Age: 50.04 ± 16.40 years</li> <li>• Gender: Female 367 (100%)</li> <li>• Ethnicity: N/A</li> <li>• BMI: N/A</li> <li>• Comorbidity: polycystic ovary syndrome 13 (3.54%), thyroid disorder 81 (22.1%), anemia 30 (8.17%)</li> <li>• Smoking: N/A</li> <li>• Alcohol: N/A</li> <li>• Skin type: N/A</li> <li>• Diet: N/A</li> <li>• Sun-exposure/ sunscreen usage: N/A</li> <li>• Disease duration: N/A</li> <li>• Disease severity score/ grading: N/A</li> <li>• Alopecia pattern: N/A</li> <li>• FH of alopecia: N/A</li> <li>• Nail involvement: N/A</li> <li>• First/ recurrent episode: N/A</li> <li>• Stable/ active disease: N/A</li> <li>• Treatment information: N/A</li> <li>• Diagnosis and severity assessment: N/A</li> </ul> |
| Vitamin D data              | <ul style="list-style-type: none"> <li>• VDD: 14 (25.9%)</li> <li>• Level: N/A</li> <li>• Correlation: N/A</li> </ul>                                                                                                                                                                                                                                                                                                                                                                                                                                                                                                                                                                                                                                                                                                                                           |
| Vitamin D measurement       | <ul style="list-style-type: none"> <li>• Definition: VDD &lt; 20 ng/ml</li> <li>• Measurement method: N/A</li> </ul>                                                                                                                                                                                                                                                                                                                                                                                                                                                                                                                                                                                                                                                                                                                                            |
| Other                       |                                                                                                                                                                                                                                                                                                                                                                                                                                                                                                                                                                                                                                                                                                                                                                                                                                                                 |

|                             |                                                                                                                                                                                                                                                                                                                                                                                                                                                                                                                                                                                                                                                                                                                                                                 |                                                                                                                                                                                                                                                                                                                                                                                                                                                                                                                                                                                                                                                                                                                                                                                                  |
|-----------------------------|-----------------------------------------------------------------------------------------------------------------------------------------------------------------------------------------------------------------------------------------------------------------------------------------------------------------------------------------------------------------------------------------------------------------------------------------------------------------------------------------------------------------------------------------------------------------------------------------------------------------------------------------------------------------------------------------------------------------------------------------------------------------|--------------------------------------------------------------------------------------------------------------------------------------------------------------------------------------------------------------------------------------------------------------------------------------------------------------------------------------------------------------------------------------------------------------------------------------------------------------------------------------------------------------------------------------------------------------------------------------------------------------------------------------------------------------------------------------------------------------------------------------------------------------------------------------------------|
| Leung et al. (2023)         |                                                                                                                                                                                                                                                                                                                                                                                                                                                                                                                                                                                                                                                                                                                                                                 |                                                                                                                                                                                                                                                                                                                                                                                                                                                                                                                                                                                                                                                                                                                                                                                                  |
| Study characteristics       | <ul style="list-style-type: none"> <li>• Study type: population-based, case-control study</li> <li>• Study duration: January 2015 to January 2020</li> <li>• Country: USA</li> </ul>                                                                                                                                                                                                                                                                                                                                                                                                                                                                                                                                                                            |                                                                                                                                                                                                                                                                                                                                                                                                                                                                                                                                                                                                                                                                                                                                                                                                  |
| Participant characteristics | <ul style="list-style-type: none"> <li>• No. of subjects: 53 CCCA</li> <li>• Age: 51.3 ± 9.6 years</li> <li>• Gender: Female 53 (100%)</li> <li>• Ethnicity: N/A</li> <li>• BMI: N/A</li> <li>• Comorbidity: African American/black 53 (100%)</li> <li>• Smoking: N/A</li> <li>• Alcohol: N/A</li> <li>• Skin type: N/A</li> <li>• Diet: N/A</li> <li>• Sun-exposure/ sunscreen usage: N/A</li> <li>• Disease duration: N/A</li> <li>• Disease severity score/ grading: N/A</li> <li>• Alopecia pattern: N/A</li> <li>• FH of alopecia: N/A</li> <li>• Nail involvement: N/A</li> <li>• First/ recurrent episode: N/A</li> <li>• Stable/ active disease: N/A</li> <li>• Treatment information: N/A</li> <li>• Diagnosis and severity assessment: N/A</li> </ul> | <ul style="list-style-type: none"> <li>• No. of subjects: 212 controls (age- and gender-matched)</li> <li>• Age: 50.3 ± 9.5 years</li> <li>• Gender: Female 212 (100%)</li> <li>• Ethnicity: N/A</li> <li>• BMI: N/A</li> <li>• Comorbidity: African American/black 212 (100%)</li> <li>• Smoking: N/A</li> <li>• Alcohol: N/A</li> <li>• Skin type: N/A</li> <li>• Diet: N/A</li> <li>• Sun-exposure/ sunscreen usage: N/A</li> <li>• Disease duration: N/A</li> <li>• Disease severity score/ grading: N/A</li> <li>• Alopecia pattern: N/A</li> <li>• FH of alopecia: N/A</li> <li>• Nail involvement: N/A</li> <li>• First/ recurrent episode: N/A</li> <li>• Stable/ active disease: N/A</li> <li>• Treatment information: N/A</li> <li>• Diagnosis and severity assessment: N/A</li> </ul> |
| Vitamin D data              | <ul style="list-style-type: none"> <li>• VDD: 5 (9.4%)</li> <li>• Level: N/A</li> <li>• Correlation: N/A</li> </ul>                                                                                                                                                                                                                                                                                                                                                                                                                                                                                                                                                                                                                                             | <ul style="list-style-type: none"> <li>• VDD: 0</li> <li>• Level: N/A</li> <li>• Correlation: N/A</li> </ul>                                                                                                                                                                                                                                                                                                                                                                                                                                                                                                                                                                                                                                                                                     |
| Vitamin D measurement       | <ul style="list-style-type: none"> <li>• Definition: VDD &lt; 20 ng/ml</li> <li>• Measurement method: N/A</li> </ul>                                                                                                                                                                                                                                                                                                                                                                                                                                                                                                                                                                                                                                            |                                                                                                                                                                                                                                                                                                                                                                                                                                                                                                                                                                                                                                                                                                                                                                                                  |
| Other                       |                                                                                                                                                                                                                                                                                                                                                                                                                                                                                                                                                                                                                                                                                                                                                                 |                                                                                                                                                                                                                                                                                                                                                                                                                                                                                                                                                                                                                                                                                                                                                                                                  |

|                             |                                                                                                                                                                                                                                                                                                                                                                                                                                                                                                                                                                                                                                                                                                                                                                                                                                                                                                                                                                                                                             |
|-----------------------------|-----------------------------------------------------------------------------------------------------------------------------------------------------------------------------------------------------------------------------------------------------------------------------------------------------------------------------------------------------------------------------------------------------------------------------------------------------------------------------------------------------------------------------------------------------------------------------------------------------------------------------------------------------------------------------------------------------------------------------------------------------------------------------------------------------------------------------------------------------------------------------------------------------------------------------------------------------------------------------------------------------------------------------|
| Hamidpour et al. (2023)     |                                                                                                                                                                                                                                                                                                                                                                                                                                                                                                                                                                                                                                                                                                                                                                                                                                                                                                                                                                                                                             |
| Study characteristics       | <ul style="list-style-type: none"> <li>• Study type: cross-sectional, descriptive, single-center study</li> <li>• Study duration: April 2018 and September 2021</li> <li>• Country: Iran</li> </ul>                                                                                                                                                                                                                                                                                                                                                                                                                                                                                                                                                                                                                                                                                                                                                                                                                         |
| Participant characteristics | <ul style="list-style-type: none"> <li>• No. of subjects: 402 AA</li> <li>• Age: <math>27.2 \pm 13.4</math> years</li> <li>• Gender: females 192 (47.8%) and males 210 (52.2%)</li> <li>• Ethnicity: N/A</li> <li>• BMI: N/A</li> <li>• Comorbidity: 145 (36%) anxiety, dermatitis 119 (30%)</li> <li>• Smoking: N/A</li> <li>• Alcohol: N/A</li> <li>• Skin type: N/A</li> <li>• Diet: N/A</li> <li>• Sun-exposure/ sunscreen usage: N/A</li> <li>• Disease duration: mean <math>1.93 \pm 2.15</math> years</li> <li>• Disease severity score/ grading: median SALT (p25-p75) 68 (40–100)</li> <li>• Alopecia pattern: 21 (39.6%) AU, 21 (39.6%) AT, 21 (39.6%) patchy AA, 2 (3.77%) ophiasis</li> <li>• FH of alopecia: 38 (9.5%) had a history of AA in their first-degree relatives</li> <li>• Nail involvement: 53 patients (13.2%)</li> <li>• First/ recurrent episode: N/A</li> <li>• Stable/ active disease: N/A</li> <li>• Treatment information: N/A</li> <li>• Diagnosis and severity assessment: N/A</li> </ul> |
| Vitamin D data              | <ul style="list-style-type: none"> <li>• VDD: 16 (4%)</li> <li>• Level: N/A</li> <li>• Correlation: N/A</li> </ul>                                                                                                                                                                                                                                                                                                                                                                                                                                                                                                                                                                                                                                                                                                                                                                                                                                                                                                          |
| Vitamin D measurement       | <ul style="list-style-type: none"> <li>• Definition: N/A</li> <li>• Measurement method: N/A</li> </ul>                                                                                                                                                                                                                                                                                                                                                                                                                                                                                                                                                                                                                                                                                                                                                                                                                                                                                                                      |
| Other                       |                                                                                                                                                                                                                                                                                                                                                                                                                                                                                                                                                                                                                                                                                                                                                                                                                                                                                                                                                                                                                             |

|                             |                                                                                                                                                                                                                                                                                                                                                                                                                                                                                                                                                                                                                                                                                                                                                   |                                                                                                                                                                                                                                                                                                                                                                                                                                                                                                                                                                                                                                                                                                                                         |
|-----------------------------|---------------------------------------------------------------------------------------------------------------------------------------------------------------------------------------------------------------------------------------------------------------------------------------------------------------------------------------------------------------------------------------------------------------------------------------------------------------------------------------------------------------------------------------------------------------------------------------------------------------------------------------------------------------------------------------------------------------------------------------------------|-----------------------------------------------------------------------------------------------------------------------------------------------------------------------------------------------------------------------------------------------------------------------------------------------------------------------------------------------------------------------------------------------------------------------------------------------------------------------------------------------------------------------------------------------------------------------------------------------------------------------------------------------------------------------------------------------------------------------------------------|
| Hailat et al. (2023)        |                                                                                                                                                                                                                                                                                                                                                                                                                                                                                                                                                                                                                                                                                                                                                   |                                                                                                                                                                                                                                                                                                                                                                                                                                                                                                                                                                                                                                                                                                                                         |
| Study characteristics       | <ul style="list-style-type: none"> <li>• Study type: retrospective, case-control, single-center study</li> <li>• Study duration: November 2021 to October 2022</li> <li>• Country: Pakistan</li> </ul>                                                                                                                                                                                                                                                                                                                                                                                                                                                                                                                                            |                                                                                                                                                                                                                                                                                                                                                                                                                                                                                                                                                                                                                                                                                                                                         |
| Participant characteristics | <ul style="list-style-type: none"> <li>• No. of subjects: 72 FPHL</li> <li>• Age: <math>28.6 \pm 2.4</math> years</li> <li>• Gender: Female 72 (100%)</li> <li>• Ethnicity: N/A</li> <li>• BMI: N/A</li> <li>• Comorbidity: N/A</li> <li>• Smoking: N/A</li> <li>• Alcohol: N/A</li> <li>• Skin type: N/A</li> <li>• Diet: N/A</li> <li>• Sun-exposure/ sunscreen usage: N/A</li> <li>• Disease duration: N/A</li> <li>• Disease severity score/ grading: N/A</li> <li>• Alopecia pattern: N/A</li> <li>• FH of alopecia: N/A</li> <li>• Nail involvement: N/A</li> <li>• First/ recurrent episode: N/A</li> <li>• Stable/ active disease: N/A</li> <li>• Treatment information: N/A</li> <li>• Diagnosis and severity assessment: N/A</li> </ul> | <ul style="list-style-type: none"> <li>• No. of subjects: 72 controls (sex-matched)</li> <li>• Age: N/A</li> <li>• Gender: Female 72 (100%)</li> <li>• Ethnicity: N/A</li> <li>• BMI: N/A</li> <li>• Comorbidity: N/A</li> <li>• Smoking: N/A</li> <li>• Alcohol: N/A</li> <li>• Skin type: N/A</li> <li>• Diet: N/A</li> <li>• Sun-exposure/ sunscreen usage: N/A</li> <li>• Disease duration: N/A</li> <li>• Disease severity score/ grading: N/A</li> <li>• Alopecia pattern: N/A</li> <li>• FH of alopecia: N/A</li> <li>• Nail involvement: N/A</li> <li>• First/ recurrent episode: N/A</li> <li>• Stable/ active disease: N/A</li> <li>• Treatment information: N/A</li> <li>• Diagnosis and severity assessment: N/A</li> </ul> |
| Vitamin D data              | <ul style="list-style-type: none"> <li>• VDD: N/A</li> <li>• Level: <math>15.4 \pm 8.25</math> ng/mL</li> <li>• Correlation: N/A</li> </ul>                                                                                                                                                                                                                                                                                                                                                                                                                                                                                                                                                                                                       | <ul style="list-style-type: none"> <li>• VDD: N/A</li> <li>• Level: <math>46.42 \pm 19.92</math> ng/mL</li> <li>• Correlation: N/A</li> </ul>                                                                                                                                                                                                                                                                                                                                                                                                                                                                                                                                                                                           |
| Vitamin D measurement       | <ul style="list-style-type: none"> <li>• Definition: N/A</li> <li>• Measurement method: N/A</li> </ul>                                                                                                                                                                                                                                                                                                                                                                                                                                                                                                                                                                                                                                            |                                                                                                                                                                                                                                                                                                                                                                                                                                                                                                                                                                                                                                                                                                                                         |
| Other                       |                                                                                                                                                                                                                                                                                                                                                                                                                                                                                                                                                                                                                                                                                                                                                   |                                                                                                                                                                                                                                                                                                                                                                                                                                                                                                                                                                                                                                                                                                                                         |



|                             |                                                                                                                                                                                                                                                                                                                                                                                                                                                                                                                                                                                                                                                                                                                                                                                                                                                                                                |                                                                                                                                                                                                                                                                                                                                                                                                                                                                                                                                                                                                                                                                                                                                                                                                                           |
|-----------------------------|------------------------------------------------------------------------------------------------------------------------------------------------------------------------------------------------------------------------------------------------------------------------------------------------------------------------------------------------------------------------------------------------------------------------------------------------------------------------------------------------------------------------------------------------------------------------------------------------------------------------------------------------------------------------------------------------------------------------------------------------------------------------------------------------------------------------------------------------------------------------------------------------|---------------------------------------------------------------------------------------------------------------------------------------------------------------------------------------------------------------------------------------------------------------------------------------------------------------------------------------------------------------------------------------------------------------------------------------------------------------------------------------------------------------------------------------------------------------------------------------------------------------------------------------------------------------------------------------------------------------------------------------------------------------------------------------------------------------------------|
| Gupta et al. (2023)         |                                                                                                                                                                                                                                                                                                                                                                                                                                                                                                                                                                                                                                                                                                                                                                                                                                                                                                |                                                                                                                                                                                                                                                                                                                                                                                                                                                                                                                                                                                                                                                                                                                                                                                                                           |
| Study characteristics       | <ul style="list-style-type: none"> <li>• Study type: prospective, case-control, single-center study</li> <li>• Study duration: June 2018 to April 2019</li> <li>• Country: India</li> </ul>                                                                                                                                                                                                                                                                                                                                                                                                                                                                                                                                                                                                                                                                                                    |                                                                                                                                                                                                                                                                                                                                                                                                                                                                                                                                                                                                                                                                                                                                                                                                                           |
| Participant characteristics | <ul style="list-style-type: none"> <li>• No. of subjects: 25 AA</li> <li>• Age: <math>27.64 \pm 9.83</math> years</li> <li>• Gender: female 8 (32 %)</li> <li>• Ethnicity: N/A</li> <li>• BMI: <math>22.63 \pm 1.35</math> kg/m<sup>2</sup></li> <li>• Comorbidity: N/A</li> <li>• Smoking: N/A</li> <li>• Alcohol: N/A</li> <li>• Skin type: N/A</li> <li>• Diet: N/A</li> <li>• Sun-exposure/ sunscreen usage: N/A</li> <li>• Disease duration: mean <math>9.51 \pm 8.89</math> months</li> <li>• Disease severity score/ grading: S1 20 (80%), S2 2 (8%), S3-5 3 (12%)</li> <li>• Alopecia pattern: AT 1 (4%), AU 2 (8%)</li> <li>• FH of alopecia: N/A</li> <li>• Nail involvement: N/A</li> <li>• First/ recurrent episode: recurrence 17 (68%)</li> <li>• Stable/ active disease: N/A</li> <li>• Treatment information: N/A</li> <li>• Diagnosis and severity assessment: N/A</li> </ul> | <ul style="list-style-type: none"> <li>• No. of subjects: 25 controls (Age- and gender-matched)</li> <li>• Age: <math>28.56 \pm 7.95</math> years</li> <li>• Gender: female 8 (32 %)</li> <li>• Ethnicity: N/A</li> <li>• BMI: <math>22.45 \pm 1.56</math> kg/m<sup>2</sup></li> <li>• Comorbidity: N/A</li> <li>• Smoking: N/A</li> <li>• Alcohol: N/A</li> <li>• Skin type: N/A</li> <li>• Diet: N/A</li> <li>• Sun-exposure/ sunscreen usage: N/A</li> <li>• Disease duration: N/A</li> <li>• Disease severity score/ grading: N/A</li> <li>• Alopecia pattern: N/A</li> <li>• FH of alopecia: N/A</li> <li>• Nail involvement: N/A</li> <li>• First/ recurrent episode: N/A</li> <li>• Stable/ active disease: N/A</li> <li>• Treatment information: N/A</li> <li>• Diagnosis and severity assessment: N/A</li> </ul> |
| Vitamin D data              | <ul style="list-style-type: none"> <li>• VDD: N/A</li> <li>• Level: <math>17.15 \pm 5.01</math> ng/ml</li> <li>• Correlation: N/A</li> </ul>                                                                                                                                                                                                                                                                                                                                                                                                                                                                                                                                                                                                                                                                                                                                                   | <ul style="list-style-type: none"> <li>• VDD: N/A</li> <li>• Level: <math>34.58 \pm 20.83</math> ng/ml</li> <li>• Correlation: N/A</li> </ul>                                                                                                                                                                                                                                                                                                                                                                                                                                                                                                                                                                                                                                                                             |
| Vitamin D measurement       | <ul style="list-style-type: none"> <li>• Definition: VDD &lt; 10 ng/ml</li> <li>• Measurement method: Siemens ADVIA Centaur Analyzer</li> </ul>                                                                                                                                                                                                                                                                                                                                                                                                                                                                                                                                                                                                                                                                                                                                                |                                                                                                                                                                                                                                                                                                                                                                                                                                                                                                                                                                                                                                                                                                                                                                                                                           |
| Other                       |                                                                                                                                                                                                                                                                                                                                                                                                                                                                                                                                                                                                                                                                                                                                                                                                                                                                                                |                                                                                                                                                                                                                                                                                                                                                                                                                                                                                                                                                                                                                                                                                                                                                                                                                           |

| Gharaei Nejad et al. (2023) |                                                                                                                                                                                                                                                                                                                                                                                                                                                                                                                                                                                                                                                                                                                                                                                                                                                                                                                                                               |
|-----------------------------|---------------------------------------------------------------------------------------------------------------------------------------------------------------------------------------------------------------------------------------------------------------------------------------------------------------------------------------------------------------------------------------------------------------------------------------------------------------------------------------------------------------------------------------------------------------------------------------------------------------------------------------------------------------------------------------------------------------------------------------------------------------------------------------------------------------------------------------------------------------------------------------------------------------------------------------------------------------|
| Study characteristics       | <ul style="list-style-type: none"> <li>• Study type: cross-sectional, descriptive, single-center study</li> <li>• Study duration: March 2016 to March 2019</li> <li>• Country: Iran</li> </ul>                                                                                                                                                                                                                                                                                                                                                                                                                                                                                                                                                                                                                                                                                                                                                                |
| Participant characteristics | <ul style="list-style-type: none"> <li>• No. of subjects: 60 LPP</li> <li>• Age: <math>43.60 \pm 10.17</math> years</li> <li>• Gender: 44 (73.3%) female, 16 (36.7%) male</li> <li>• Ethnicity: N/A</li> <li>• BMI: <math>26.52 \pm 3.41</math> kg/m<sup>2</sup></li> <li>• Comorbidity: 5.0%, 18.3%, 27.7%, 11.7%, 16.7%, and 20.0% had vitiligo, asthma and/ or allergy, hypothyroidism, diabetes, hypertension, and anemia, respectively</li> <li>• Smoking: N/A</li> <li>• Alcohol: N/A</li> <li>• Skin type: N/A</li> <li>• Diet: N/A</li> <li>• Sun-exposure/ sunscreen usage: N/A</li> <li>• Disease duration: N/A</li> <li>• Disease severity score/ grading: N/A</li> <li>• Alopecia pattern: N/A</li> <li>• FH of alopecia: N/A</li> <li>• Nail involvement: N/A</li> <li>• First/ recurrent episode: N/A</li> <li>• Stable/ active disease: N/A</li> <li>• Treatment information: N/A</li> <li>• Diagnosis and severity assessment: N/A</li> </ul> |
| Vitamin D data              | <ul style="list-style-type: none"> <li>• VDD: 18 (30%)</li> <li>• Level: N/A</li> <li>• Correlation: N/A</li> </ul>                                                                                                                                                                                                                                                                                                                                                                                                                                                                                                                                                                                                                                                                                                                                                                                                                                           |
| Vitamin D measurement       | <ul style="list-style-type: none"> <li>• Definition: VDD &lt; 20 ng/ml</li> <li>• Measurement method: N/A</li> </ul>                                                                                                                                                                                                                                                                                                                                                                                                                                                                                                                                                                                                                                                                                                                                                                                                                                          |
| Other                       |                                                                                                                                                                                                                                                                                                                                                                                                                                                                                                                                                                                                                                                                                                                                                                                                                                                                                                                                                               |

|                             |                                                                                                                                                                                                                                                                                                                                                                                                                                                                                                                                                                                                                                                                                                                                                                                                           |
|-----------------------------|-----------------------------------------------------------------------------------------------------------------------------------------------------------------------------------------------------------------------------------------------------------------------------------------------------------------------------------------------------------------------------------------------------------------------------------------------------------------------------------------------------------------------------------------------------------------------------------------------------------------------------------------------------------------------------------------------------------------------------------------------------------------------------------------------------------|
| Fahim et al. (2023)         |                                                                                                                                                                                                                                                                                                                                                                                                                                                                                                                                                                                                                                                                                                                                                                                                           |
| Study characteristics       | <ul style="list-style-type: none"> <li>• Study type: prospective, descriptive, single-center study</li> <li>• Study duration: N/A</li> <li>• Country: Pakistan</li> </ul>                                                                                                                                                                                                                                                                                                                                                                                                                                                                                                                                                                                                                                 |
| Participant characteristics | <ul style="list-style-type: none"> <li>• No. of subjects: 100 AA</li> <li>• Age: <math>30.5 \pm 8.4</math> years</li> <li>• Gender: Female 58 (58%)</li> <li>• Ethnicity: N/A</li> <li>• BMI: N/A</li> <li>• Comorbidity: N/A</li> <li>• Smoking: N/A</li> <li>• Alcohol: N/A</li> <li>• Skin type: N/A</li> <li>• Diet: N/A</li> <li>• Sun-exposure/ sunscreen usage: N/A</li> <li>• Disease duration: <math>6 \pm 3.8</math> months</li> <li>• Disease severity score/ grading: mean SALT <math>20.7 \pm 5.4</math></li> <li>• Alopecia pattern: N/A</li> <li>• FH of alopecia: N/A</li> <li>• Nail involvement: N/A</li> <li>• First/ recurrent episode: N/A</li> <li>• Stable/ active disease: N/A</li> <li>• Treatment information: N/A</li> <li>• Diagnosis and severity assessment: N/A</li> </ul> |
| Vitamin D data              | <ul style="list-style-type: none"> <li>• VDD: 69 (69%)</li> <li>• Level: N/A</li> <li>• Correlation: N/A</li> </ul>                                                                                                                                                                                                                                                                                                                                                                                                                                                                                                                                                                                                                                                                                       |
| Vitamin D measurement       | <ul style="list-style-type: none"> <li>• Definition: VDD &lt; 20 ng/ml</li> <li>• Measurement method: N/A</li> </ul>                                                                                                                                                                                                                                                                                                                                                                                                                                                                                                                                                                                                                                                                                      |
| Other                       |                                                                                                                                                                                                                                                                                                                                                                                                                                                                                                                                                                                                                                                                                                                                                                                                           |

|                             |                                                                                                                                                                                                                                                                                                                                                                                                                                                                                                                                                                                                                                                                                                                                                                                                    |
|-----------------------------|----------------------------------------------------------------------------------------------------------------------------------------------------------------------------------------------------------------------------------------------------------------------------------------------------------------------------------------------------------------------------------------------------------------------------------------------------------------------------------------------------------------------------------------------------------------------------------------------------------------------------------------------------------------------------------------------------------------------------------------------------------------------------------------------------|
| Arslan et al. (2023)        |                                                                                                                                                                                                                                                                                                                                                                                                                                                                                                                                                                                                                                                                                                                                                                                                    |
| Study characteristics       | <ul style="list-style-type: none"> <li>• Study type: retrospective, descriptive, single-center study</li> <li>• Study duration: March 2015 to March 2018</li> <li>• Country: Turkey</li> </ul>                                                                                                                                                                                                                                                                                                                                                                                                                                                                                                                                                                                                     |
| Participant characteristics | <ul style="list-style-type: none"> <li>• No. of subjects: 973 TE (58 with vitamin D results)</li> <li>• Age: <math>27.54 \pm 9.42</math> years</li> <li>• Gender: female 840 (86.3%), male 133 (13.7%)</li> <li>• Ethnicity: N/A</li> <li>• BMI: N/A</li> <li>• Comorbidity: N/A</li> <li>• Smoking: N/A</li> <li>• Alcohol: N/A</li> <li>• Skin type: N/A</li> <li>• Diet: N/A</li> <li>• Sun-exposure/ sunscreen usage: N/A</li> <li>• Disease duration: N/A</li> <li>• Disease severity score/ grading: N/A</li> <li>• Alopecia pattern: N/A</li> <li>• FH of alopecia: N/A</li> <li>• Nail involvement: N/A</li> <li>• First/ recurrent episode: N/A</li> <li>• Stable/ active disease: N/A</li> <li>• Treatment information: N/A</li> <li>• Diagnosis and severity assessment: N/A</li> </ul> |
| Vitamin D data              | <ul style="list-style-type: none"> <li>• VDD: 51 (87.9%)</li> <li>• Level: N/A</li> <li>• Correlation: N/A</li> </ul>                                                                                                                                                                                                                                                                                                                                                                                                                                                                                                                                                                                                                                                                              |
| Vitamin D measurement       | <ul style="list-style-type: none"> <li>• Definition: VDD &lt; 25 ng/ml</li> <li>• Measurement method: N/A</li> </ul>                                                                                                                                                                                                                                                                                                                                                                                                                                                                                                                                                                                                                                                                               |
| Other                       |                                                                                                                                                                                                                                                                                                                                                                                                                                                                                                                                                                                                                                                                                                                                                                                                    |

|                             |                                                                                                                                                                                                                                                                                                                                                                                                                                                                                                                                                                                                                                                                                                                                                                                                                                                                                                                                                                                                            |                                                                                                                                                                                                                                                                                                                                                                                                                                                                                                                                                                                                                                                                                                                                                      |
|-----------------------------|------------------------------------------------------------------------------------------------------------------------------------------------------------------------------------------------------------------------------------------------------------------------------------------------------------------------------------------------------------------------------------------------------------------------------------------------------------------------------------------------------------------------------------------------------------------------------------------------------------------------------------------------------------------------------------------------------------------------------------------------------------------------------------------------------------------------------------------------------------------------------------------------------------------------------------------------------------------------------------------------------------|------------------------------------------------------------------------------------------------------------------------------------------------------------------------------------------------------------------------------------------------------------------------------------------------------------------------------------------------------------------------------------------------------------------------------------------------------------------------------------------------------------------------------------------------------------------------------------------------------------------------------------------------------------------------------------------------------------------------------------------------------|
| Alsenaid et al. (2023)      |                                                                                                                                                                                                                                                                                                                                                                                                                                                                                                                                                                                                                                                                                                                                                                                                                                                                                                                                                                                                            |                                                                                                                                                                                                                                                                                                                                                                                                                                                                                                                                                                                                                                                                                                                                                      |
| Study characteristics       | <ul style="list-style-type: none"> <li>• Study type: case-control, single-center study</li> <li>• Study duration: June 2021 to October 2022</li> <li>• Country: Saudi Arabia</li> </ul>                                                                                                                                                                                                                                                                                                                                                                                                                                                                                                                                                                                                                                                                                                                                                                                                                    |                                                                                                                                                                                                                                                                                                                                                                                                                                                                                                                                                                                                                                                                                                                                                      |
| Participant characteristics | <ul style="list-style-type: none"> <li>• No. of subjects: 59 AA</li> <li>• Age: <math>27.1 \pm 9.1</math> years</li> <li>• Gender: Female 6 (10.2%)</li> <li>• Ethnicity: N/A</li> <li>• BMI: N/A</li> <li>• Comorbidity: AGA 9 (15.3%), T1DM 1 (1.7%)</li> <li>• Smoking: N/A</li> <li>• Alcohol: N/A</li> <li>• Skin type: N/A</li> <li>• Diet: N/A</li> <li>• Sun-exposure/ sunscreen usage: N/A</li> <li>• Disease duration: 22 (37.3%) &gt; 6 months</li> <li>• Disease severity score/ grading: moderate 6 (10.2%), severe 9 (15.3%)</li> <li>• Alopecia pattern: N/A</li> <li>• FH of alopecia: AGA 17 (28.8%), AA 7 (11.9%)</li> <li>• Nail involvement: N/A</li> <li>• First/ recurrent episode: N/A</li> <li>• Stable/ active disease: N/A</li> <li>• Treatment information: no treatment 28 (47.5%), topical steroid 9 (15.3%), minoxidil 11 (18.6%), intralesional steroids 10 (16.9%), traditional 9 (15.3%), and other 3 (5.1%)</li> <li>• Diagnosis and severity assessment: N/A</li> </ul> | <ul style="list-style-type: none"> <li>• No. of subjects: 60 controls</li> <li>• Age: <math>27.4 \pm 10.3</math> years</li> <li>• Gender: Female 9 (15%)</li> <li>• Ethnicity: N/A</li> <li>• BMI: N/A</li> <li>• Comorbidity: N/A</li> <li>• Smoking: N/A</li> <li>• Alcohol: N/A</li> <li>• Skin type: N/A</li> <li>• Diet: N/A</li> <li>• Sun-exposure/ sunscreen usage: N/A</li> <li>• Disease duration: N/A</li> <li>• Disease severity score/ grading: N/A</li> <li>• Alopecia pattern: N/A</li> <li>• FH of alopecia: N/A</li> <li>• Nail involvement: N/A</li> <li>• First/ recurrent episode: N/A</li> <li>• Stable/ active disease: N/A</li> <li>• Treatment information: N/A</li> <li>• Diagnosis and severity assessment: N/A</li> </ul> |
| Vitamin D data              | <ul style="list-style-type: none"> <li>• VDD: N/A</li> <li>• Level: <math>20 \pm 8.9</math> ng/mL</li> <li>• Correlation: N/A</li> </ul>                                                                                                                                                                                                                                                                                                                                                                                                                                                                                                                                                                                                                                                                                                                                                                                                                                                                   | <ul style="list-style-type: none"> <li>• VDD: N/A</li> <li>• Level: <math>27.6 \pm 10</math> ng/mL</li> <li>• Correlation: N/A</li> </ul>                                                                                                                                                                                                                                                                                                                                                                                                                                                                                                                                                                                                            |
| Vitamin D measurement       | <ul style="list-style-type: none"> <li>• Definition: VDD &lt; 20 ng/ml</li> <li>• Measurement method: Roche Cobase411 system (Roche Diagnostics System, Switzerland)</li> </ul>                                                                                                                                                                                                                                                                                                                                                                                                                                                                                                                                                                                                                                                                                                                                                                                                                            |                                                                                                                                                                                                                                                                                                                                                                                                                                                                                                                                                                                                                                                                                                                                                      |
| Other                       |                                                                                                                                                                                                                                                                                                                                                                                                                                                                                                                                                                                                                                                                                                                                                                                                                                                                                                                                                                                                            |                                                                                                                                                                                                                                                                                                                                                                                                                                                                                                                                                                                                                                                                                                                                                      |

|                             |                                                                                                                                                                                                                                                                                                                                                                                                                                                                                                                                                                                                                                                                                                                                                                                                                                             |                                                                                                                                                                                                                                                                                                                                                                                                                                                                                                                                                                                                                                                                                                                                                                                                                                                |
|-----------------------------|---------------------------------------------------------------------------------------------------------------------------------------------------------------------------------------------------------------------------------------------------------------------------------------------------------------------------------------------------------------------------------------------------------------------------------------------------------------------------------------------------------------------------------------------------------------------------------------------------------------------------------------------------------------------------------------------------------------------------------------------------------------------------------------------------------------------------------------------|------------------------------------------------------------------------------------------------------------------------------------------------------------------------------------------------------------------------------------------------------------------------------------------------------------------------------------------------------------------------------------------------------------------------------------------------------------------------------------------------------------------------------------------------------------------------------------------------------------------------------------------------------------------------------------------------------------------------------------------------------------------------------------------------------------------------------------------------|
| Arasu et al. (2022)         |                                                                                                                                                                                                                                                                                                                                                                                                                                                                                                                                                                                                                                                                                                                                                                                                                                             |                                                                                                                                                                                                                                                                                                                                                                                                                                                                                                                                                                                                                                                                                                                                                                                                                                                |
| Study characteristics       | <ul style="list-style-type: none"> <li>• Study type: retrospective, case-control, single-center study</li> <li>• Study duration: March 2013 and February 2020</li> <li>• Country: Australia</li> </ul>                                                                                                                                                                                                                                                                                                                                                                                                                                                                                                                                                                                                                                      |                                                                                                                                                                                                                                                                                                                                                                                                                                                                                                                                                                                                                                                                                                                                                                                                                                                |
| Participant characteristics | <ul style="list-style-type: none"> <li>• No. of subjects: 100 FFA</li> <li>• Age: mean 63 years</li> <li>• Gender: Female 100 (100%)</li> <li>• Ethnicity: Caucasian 97 (97%), Asian 2 (2%), African 1 (1%)</li> <li>• BMI: N/A</li> <li>• Comorbidity: At least 1 additional comorbidity 63 (63%)</li> <li>• Smoking: 2 (1%) of the whole cohort</li> <li>• Alcohol: N/A</li> <li>• Skin type: N/A</li> <li>• Diet: N/A</li> <li>• Sun-exposure/ sunscreen usage: N/A</li> <li>• Disease duration: N/A</li> <li>• Disease severity score/ grading: N/A</li> <li>• Alopecia pattern: N/A</li> <li>• FH of alopecia: N/A</li> <li>• Nail involvement: N/A</li> <li>• First/ recurrent episode: N/A</li> <li>• Stable/ active disease: N/A</li> <li>• Treatment information: N/A</li> <li>• Diagnosis and severity assessment: N/A</li> </ul> | <ul style="list-style-type: none"> <li>• No. of subjects: 100 FPHL</li> <li>• Age: mean 51 years</li> <li>• Gender: Female 100 (100%)</li> <li>• Ethnicity: Caucasian 83 (83%), Asian 16 (16%), African 1 (1%)</li> <li>• BMI: N/A</li> <li>• Comorbidity: At least 1 additional comorbidity 52 (52%)</li> <li>• Smoking: 2 (1%) of the whole cohort</li> <li>• Alcohol: N/A</li> <li>• Skin type: N/A</li> <li>• Diet: N/A</li> <li>• Sun-exposure/ sunscreen usage: N/A</li> <li>• Disease duration: N/A</li> <li>• Disease severity score/ grading: N/A</li> <li>• Alopecia pattern: N/A</li> <li>• FH of alopecia: N/A</li> <li>• Nail involvement: N/A</li> <li>• First/ recurrent episode: N/A</li> <li>• Stable/ active disease: N/A</li> <li>• Treatment information: N/A</li> <li>• Diagnosis and severity assessment: N/A</li> </ul> |
| Vitamin D data              | <ul style="list-style-type: none"> <li>• VDD: 20 (20%)</li> <li>• Level: N/A</li> <li>• Correlation: N/A</li> </ul>                                                                                                                                                                                                                                                                                                                                                                                                                                                                                                                                                                                                                                                                                                                         | <ul style="list-style-type: none"> <li>• VDD: 20 (20%)</li> <li>• Level: N/A</li> <li>• Correlation: N/A</li> </ul>                                                                                                                                                                                                                                                                                                                                                                                                                                                                                                                                                                                                                                                                                                                            |
| Vitamin D measurement       | <ul style="list-style-type: none"> <li>• Definition: VDD &lt; 20 ng/ml (cutoffs 50 nmol/L, 30-49 nmol/L, 12.5-29 nmol/L and 12.5 nmol/L were used)</li> <li>• Measurement method: N/A</li> </ul>                                                                                                                                                                                                                                                                                                                                                                                                                                                                                                                                                                                                                                            |                                                                                                                                                                                                                                                                                                                                                                                                                                                                                                                                                                                                                                                                                                                                                                                                                                                |
| Other                       | <ul style="list-style-type: none"> <li>• Exclusion criteria: Vitamin D supplementation were excluded</li> </ul>                                                                                                                                                                                                                                                                                                                                                                                                                                                                                                                                                                                                                                                                                                                             |                                                                                                                                                                                                                                                                                                                                                                                                                                                                                                                                                                                                                                                                                                                                                                                                                                                |

|                             |                                                                                                                                                                                                                                                                                                                                                                                                                                                                                                                                                                                                                                                                                                                                                                                                                                                                                                                                                                             |
|-----------------------------|-----------------------------------------------------------------------------------------------------------------------------------------------------------------------------------------------------------------------------------------------------------------------------------------------------------------------------------------------------------------------------------------------------------------------------------------------------------------------------------------------------------------------------------------------------------------------------------------------------------------------------------------------------------------------------------------------------------------------------------------------------------------------------------------------------------------------------------------------------------------------------------------------------------------------------------------------------------------------------|
| Chen et al. (2022)          |                                                                                                                                                                                                                                                                                                                                                                                                                                                                                                                                                                                                                                                                                                                                                                                                                                                                                                                                                                             |
| Study characteristics       | <ul style="list-style-type: none"> <li>• Study type: retrospective, descriptive cross-sectional, single-center study</li> <li>• Study duration: January 1, 2009 to February 2, 2021</li> <li>• Country: USA</li> </ul>                                                                                                                                                                                                                                                                                                                                                                                                                                                                                                                                                                                                                                                                                                                                                      |
| Participant characteristics | <ul style="list-style-type: none"> <li>• No. of subjects: 76 TE (68 with vitamin D results: 45 ATE and 23 CTE)</li> <li>• Age: mean disease onset 12.3 years (pediatric)</li> <li>• Gender: Female 67/76 (88%), Male 9/76 (12%)</li> <li>• Ethnicity: African-American/Black (3%), Asian (3%), Hispanic or Latino (62%), multi-race (3%), and White (28%).</li> <li>• BMI: N/A</li> <li>• Comorbidity: Additional non-dermatologic conditions 32% (24/76)</li> <li>• Smoking: N/A</li> <li>• Alcohol: N/A</li> <li>• Skin type: N/A</li> <li>• Diet: N/A</li> <li>• Sun-exposure/ sunscreen usage: N/A</li> <li>• Disease duration: N/A</li> <li>• Disease severity score/ grading: N/A</li> <li>• Alopecia pattern: N/A</li> <li>• FH of alopecia: N/A</li> <li>• Nail involvement: N/A</li> <li>• First/ recurrent episode: N/A</li> <li>• Stable/ active disease: N/A</li> <li>• Treatment information: N/A</li> <li>• Diagnosis and severity assessment: N/A</li> </ul> |
| Vitamin D data              | <ul style="list-style-type: none"> <li>• TE: VDD 13 (19.1%)</li> <li>• ATE: VDD 7 (15.6 %)</li> <li>• CTE: VDD 6 (26.1 %)</li> <li>• Level: N/A</li> <li>• Correlation: N/A</li> </ul>                                                                                                                                                                                                                                                                                                                                                                                                                                                                                                                                                                                                                                                                                                                                                                                      |
| Vitamin D measurement       | <ul style="list-style-type: none"> <li>• Definition: N/A</li> <li>• Measurement method: N/A</li> </ul>                                                                                                                                                                                                                                                                                                                                                                                                                                                                                                                                                                                                                                                                                                                                                                                                                                                                      |
| Other                       | <ul style="list-style-type: none"> <li>• Exclusion criteria: Records without TE diagnosis, with unclear documentation, with a co-existing disease of the scalp or hair, or duplicate records were excluded</li> </ul>                                                                                                                                                                                                                                                                                                                                                                                                                                                                                                                                                                                                                                                                                                                                                       |

|                             |                                                                                                                                                                                                                                                                                                                                                                                                                                                                                                                                                                                                                                                                                                                                            |
|-----------------------------|--------------------------------------------------------------------------------------------------------------------------------------------------------------------------------------------------------------------------------------------------------------------------------------------------------------------------------------------------------------------------------------------------------------------------------------------------------------------------------------------------------------------------------------------------------------------------------------------------------------------------------------------------------------------------------------------------------------------------------------------|
| Collins et al. (2022)       |                                                                                                                                                                                                                                                                                                                                                                                                                                                                                                                                                                                                                                                                                                                                            |
| Study characteristics       | <ul style="list-style-type: none"> <li>• Study type: retrospective, descriptive cross-sectional, single center study</li> <li>• Study duration: N/A</li> <li>• Country: USA</li> </ul>                                                                                                                                                                                                                                                                                                                                                                                                                                                                                                                                                     |
| Participant characteristics | <ul style="list-style-type: none"> <li>• No. of subjects: 27 CCCA</li> <li>• Age: N/A</li> <li>• Gender: N/A</li> <li>• Ethnicity: Black 27 (100%)</li> <li>• BMI: N/A</li> <li>• Comorbidity: N/A</li> <li>• Smoking: N/A</li> <li>• Alcohol: N/A</li> <li>• Skin type: N/A</li> <li>• Diet: N/A</li> <li>• Sun-exposure/ sunscreen usage: N/A</li> <li>• Disease duration: N/A</li> <li>• Disease severity score/ grading: N/A</li> <li>• Alopecia pattern: N/A</li> <li>• FH of alopecia: N/A</li> <li>• Nail involvement: N/A</li> <li>• First/ recurrent episode: N/A</li> <li>• Stable/ active disease: N/A</li> <li>• Treatment information: N/A</li> <li>• Diagnosis and severity assessment: specialty alopecia clinic</li> </ul> |
| Vitamin D data              | <ul style="list-style-type: none"> <li>• VDD: 25 (92.5%)</li> <li>• Level: N/A</li> <li>• Correlation: N/A</li> </ul>                                                                                                                                                                                                                                                                                                                                                                                                                                                                                                                                                                                                                      |
| Vitamin D measurement       | <ul style="list-style-type: none"> <li>• Definition: VDD &lt;20 ng/mL, VDI 21 and 29 ng/mL</li> <li>• Measurement method: N/A</li> </ul>                                                                                                                                                                                                                                                                                                                                                                                                                                                                                                                                                                                                   |
| Other                       | <ul style="list-style-type: none"> <li>• Exclusion criteria: Patients were excluded if they did not have a serum vitamin D level documented or if multivitamin or vitamin D supplementation was recorded in the medical record.</li> </ul>                                                                                                                                                                                                                                                                                                                                                                                                                                                                                                 |



| Das (2022)                  |                                                                                                                                                                                                                                                                                                                                                                                                                                                                                                                                                                                                                                                                                                                                                                                                                                                                                                  |                                                                                                                                                                                                                                                                                                                                                                                                                     |
|-----------------------------|--------------------------------------------------------------------------------------------------------------------------------------------------------------------------------------------------------------------------------------------------------------------------------------------------------------------------------------------------------------------------------------------------------------------------------------------------------------------------------------------------------------------------------------------------------------------------------------------------------------------------------------------------------------------------------------------------------------------------------------------------------------------------------------------------------------------------------------------------------------------------------------------------|---------------------------------------------------------------------------------------------------------------------------------------------------------------------------------------------------------------------------------------------------------------------------------------------------------------------------------------------------------------------------------------------------------------------|
| Study characteristics       | <ul style="list-style-type: none"> <li>• Study type: case-control, single-center study</li> <li>• Study duration: N/A</li> <li>• Country: India</li> </ul>                                                                                                                                                                                                                                                                                                                                                                                                                                                                                                                                                                                                                                                                                                                                       |                                                                                                                                                                                                                                                                                                                                                                                                                     |
| Participant characteristics | <ul style="list-style-type: none"> <li>• No. of subjects: 50 AA</li> <li>• Age: <math>25.07 \pm 7.40</math> years</li> <li>• Gender: Male 32 (64%), female 18 (36%)</li> <li>• Ethnicity: N/A</li> <li>• BMI: N/A</li> <li>• Comorbidity: N/A</li> <li>• Smoking: N/A</li> <li>• Alcohol: N/A</li> <li>• Skin type: N/A</li> <li>• Diet: N/A</li> <li>• Sun-exposure/ sunscreen usage: N/A</li> <li>• Disease duration: N/A</li> <li>• Disease severity score/ grading: SALT class; S1 = 35 (70%), S2 = 10 (20%), S3 = 5 (10%), mean SALT score 22.3 (calculated)</li> <li>• Alopecia pattern: N/A</li> <li>• FH of alopecia: FH of AA 48 (96%)</li> <li>• Nail involvement: N/A</li> <li>• First/ recurrent episode: N/A</li> <li>• Stable/ active disease: N/A</li> <li>• Treatment information: N/A</li> <li>• <u>Diagnosis and severity assessment: department of Skin and VD</u></li> </ul> | <ul style="list-style-type: none"> <li>• No. of subjects: 50 control subjects</li> <li>• Age: <math>24.48 \pm 6.30</math> years</li> <li>• Gender: Male 30 (60%), female 20 (40%)</li> <li>• Ethnicity: N/A</li> <li>• BMI: N/A</li> <li>• Comorbidity: N/A</li> <li>• Smoking: N/A</li> <li>• Alcohol: N/A</li> <li>• Skin type: N/A</li> <li>• Diet: N/A</li> <li>• Sun-exposure/ sunscreen usage: N/A</li> </ul> |
| Vitamin D data              | <ul style="list-style-type: none"> <li>• VDD: 15 (30 %)</li> <li>• VDI: 35 (70 %)</li> <li>• Normal: 0</li> <li>• Level: <math>12.45 \pm 4.80</math> ng/ml</li> <li>• Correlation: Vitamin D level and SALT score; <math>r = -0.32</math>, <math>p=0.04626</math></li> </ul>                                                                                                                                                                                                                                                                                                                                                                                                                                                                                                                                                                                                                     | <ul style="list-style-type: none"> <li>• VDD: 0</li> <li>• VDI: 20 (40 %)</li> <li>• Normal: 30 (60%)</li> <li>• Level: <math>33.73 \pm 10.02</math> ng/ml</li> </ul>                                                                                                                                                                                                                                               |
| Vitamin D measurement       | <ul style="list-style-type: none"> <li>• Definition: VDD &lt; 10 ng/ml, VDI 10-30 ng/ml, Normal 30-60 ng/ml</li> <li>• Measurement method: Enhanced chemiluminescence method (ECI) was used</li> </ul>                                                                                                                                                                                                                                                                                                                                                                                                                                                                                                                                                                                                                                                                                           |                                                                                                                                                                                                                                                                                                                                                                                                                     |
| Other                       | <ul style="list-style-type: none"> <li>• Exclusion criteria: patients with following criteria were excluded (a) AA of extra-scalp sites only; (b) with other causes of alopecia i.e.; tinea capitis, androgenic alopecia (male or female pattern), scarring alopecia, traction alopecia, and telogen effluvium; (c) on any topical or oral steroid, immunosuppressive drugs, calcium or vitamin D supplementation, or using any photo- protective measures; (d) with history of any autoimmune or systemic diseases; and (e) with Body mass index <math>\geq 25</math>.</li> </ul>                                                                                                                                                                                                                                                                                                               |                                                                                                                                                                                                                                                                                                                                                                                                                     |

| deQueiroz et al. (2022)     |                                                                                                                                                                                                                                                                                                                                                                                                                                                                                                                                                                                                                                                                                                                                                                                                                                       |                                                                                                                                                                                                                                                                                                                                                                                                                                                                                                                                                                                                                                                                                                                                                                                                                                        |                                                                                                                                                                                                                                                                                                                                                                                                                                                                                                                                                                                                                                                                                                                                                             |                                                                                                                                                                                                                                                                                                                                                                                                                                                                                 |
|-----------------------------|---------------------------------------------------------------------------------------------------------------------------------------------------------------------------------------------------------------------------------------------------------------------------------------------------------------------------------------------------------------------------------------------------------------------------------------------------------------------------------------------------------------------------------------------------------------------------------------------------------------------------------------------------------------------------------------------------------------------------------------------------------------------------------------------------------------------------------------|----------------------------------------------------------------------------------------------------------------------------------------------------------------------------------------------------------------------------------------------------------------------------------------------------------------------------------------------------------------------------------------------------------------------------------------------------------------------------------------------------------------------------------------------------------------------------------------------------------------------------------------------------------------------------------------------------------------------------------------------------------------------------------------------------------------------------------------|-------------------------------------------------------------------------------------------------------------------------------------------------------------------------------------------------------------------------------------------------------------------------------------------------------------------------------------------------------------------------------------------------------------------------------------------------------------------------------------------------------------------------------------------------------------------------------------------------------------------------------------------------------------------------------------------------------------------------------------------------------------|---------------------------------------------------------------------------------------------------------------------------------------------------------------------------------------------------------------------------------------------------------------------------------------------------------------------------------------------------------------------------------------------------------------------------------------------------------------------------------|
| Study characteristics       | <ul style="list-style-type: none"> <li>• Study type: case-control study, single-center</li> <li>• Study duration: N/A</li> <li>• Country: Brazil</li> </ul>                                                                                                                                                                                                                                                                                                                                                                                                                                                                                                                                                                                                                                                                           |                                                                                                                                                                                                                                                                                                                                                                                                                                                                                                                                                                                                                                                                                                                                                                                                                                        |                                                                                                                                                                                                                                                                                                                                                                                                                                                                                                                                                                                                                                                                                                                                                             |                                                                                                                                                                                                                                                                                                                                                                                                                                                                                 |
| Participant characteristics | <ul style="list-style-type: none"> <li>• No. of subjects: 7 AA</li> <li>• Age: <math>44.2 \pm 14.9</math> years</li> <li>• Gender: Female 7 (100%)</li> <li>• Ethnicity: N/A</li> <li>• BMI: N/A</li> <li>• Comorbidity: N/A</li> <li>• Smoking: N/A</li> <li>• Alcohol: N/A</li> <li>• Skin type: Phototype III 42 %</li> <li>• Diet: Dietary restrictions 0 (0 %)</li> <li>• Sun-exposure/ sunscreen usage: Sunscreen use 5 (71.5 %)</li> <li>• Disease duration: N/A</li> <li>• Disease severity score/ grading: N/A</li> <li>• Alopecia pattern: N/A</li> <li>• FH of alopecia: N/A</li> <li>• Nail involvement: N/A</li> <li>• First/ recurrent episode: N/A</li> <li>• Stable/ active disease: N/A</li> <li>• Treatment information: N/A</li> <li>• Diagnosis and severity assessment: outpatient dermatology clinic</li> </ul> | <ul style="list-style-type: none"> <li>• No. of subjects: 37 FPHL</li> <li>• Age: <math>54.8 \pm 15.0</math> years</li> <li>• Gender: Female 37 (100%)</li> <li>• Ethnicity: N/A</li> <li>• BMI: N/A</li> <li>• Comorbidity: N/A</li> <li>• Smoking: N/A</li> <li>• Alcohol: N/A</li> <li>• Skin type: Phototype III 43%</li> <li>• Diet: Dietary restrictions 5 (13%)</li> <li>• Sun-exposure/ sunscreen usage: Sunscreen use 26 (70%)</li> <li>• Disease duration: N/A</li> <li>• Disease severity score/ grading: N/A</li> <li>• Alopecia pattern: N/A</li> <li>• FH of alopecia: N/A</li> <li>• Nail involvement: N/A</li> <li>• First/ recurrent episode: N/A</li> <li>• Stable/ active disease: N/A</li> <li>• Treatment information: N/A</li> <li>• Diagnosis and severity assessment: outpatient dermatology clinic</li> </ul> | <ul style="list-style-type: none"> <li>• No. of subjects: 17 TE</li> <li>• Age: <math>42.8 \pm 14.55</math> years</li> <li>• Gender: Female 17 (100%)</li> <li>• Ethnicity: N/A</li> <li>• BMI: N/A</li> <li>• Comorbidity: N/A</li> <li>• Smoking: N/A</li> <li>• Alcohol: N/A</li> <li>• Skin type: Phototype III 52 %</li> <li>• Diet: Dietary restrictions 3 (17 %)</li> <li>• Sun-exposure/ sunscreen usage: Sunscreen use 14 (82%)</li> <li>• Disease duration: N/A</li> <li>• Disease severity score/ grading: N/A</li> <li>• Alopecia pattern: N/A</li> <li>• FH of alopecia: N/A</li> <li>• Nail involvement: N/A</li> <li>• First/ recurrent episode: N/A</li> <li>• Stable/ active disease: N/A</li> <li>• Treatment information: N/A</li> </ul> | <ul style="list-style-type: none"> <li>• No. of subjects: 33 control with other skin conditions</li> <li>• Age: <math>38.8 \pm 16.0</math> years</li> <li>• Gender: Female 37 (100%)</li> <li>• Ethnicity: N/A</li> <li>• BMI: N/A</li> <li>• Comorbidity: N/A</li> <li>• Smoking: N/A</li> <li>• Alcohol: N/A</li> <li>• Skin type: Phototype III 30%</li> <li>• Diet: Dietary restrictions 3 (9%)</li> <li>• Sun-exposure/ sunscreen usage: Sunscreen use 32 (96%)</li> </ul> |

|                       |                                                                                                                                                                                                                                                                                                                                               |                                                                                                                                                    |                                                                                                                                                   |                                                                                                                        |
|-----------------------|-----------------------------------------------------------------------------------------------------------------------------------------------------------------------------------------------------------------------------------------------------------------------------------------------------------------------------------------------|----------------------------------------------------------------------------------------------------------------------------------------------------|---------------------------------------------------------------------------------------------------------------------------------------------------|------------------------------------------------------------------------------------------------------------------------|
|                       |                                                                                                                                                                                                                                                                                                                                               |                                                                                                                                                    | <ul style="list-style-type: none"> <li>• Diagnosis and severity assessment: outpatient dermatology clinic</li> </ul>                              |                                                                                                                        |
| Vitamin D data        | <ul style="list-style-type: none"> <li>• VDD: 3 (42.9 %)</li> <li>• Level: <math>20.4 \pm 3.9</math> ng/ml</li> <li>• Correlation: N/A</li> </ul>                                                                                                                                                                                             | <ul style="list-style-type: none"> <li>• VDD: 22 (59.5 %)</li> <li>• Level: <math>18.0 \pm 6.7</math> ng/ml</li> <li>• Correlation: N/A</li> </ul> | <ul style="list-style-type: none"> <li>• VDD: 9 (52.9 %)</li> <li>• Level: <math>18.8 \pm 6.6</math> ng/ml</li> <li>• Correlation: N/A</li> </ul> | <ul style="list-style-type: none"> <li>• VDD: 12 (36.4 %)</li> <li>• Level: <math>22.9 \pm 7.6</math> ng/ml</li> </ul> |
| Vitamin D measurement | <ul style="list-style-type: none"> <li>• Definition: No VDD: definition</li> <li>• Measurement method: N/A</li> </ul>                                                                                                                                                                                                                         |                                                                                                                                                    |                                                                                                                                                   |                                                                                                                        |
| Other                 | <ul style="list-style-type: none"> <li>• Exclusion criteria: Use of oral vitamin D or iron supplements, topical vitamin D analogs, thyroid disorders, elevated erythrocyte sedimentation rate, recent phototherapy history (in the past 12 months), renal or hepatic insufficiency, malignancies or diagnose of scarring alopecia.</li> </ul> |                                                                                                                                                    |                                                                                                                                                   |                                                                                                                        |

|                             |                                                                                                                                                                                                                                                                                                                                                                                                                                                                                                                                                                                                                                                                                                                                                                                                                                                                |                                                                                                                                                                                                                                                                                                                                                                                                                               |
|-----------------------------|----------------------------------------------------------------------------------------------------------------------------------------------------------------------------------------------------------------------------------------------------------------------------------------------------------------------------------------------------------------------------------------------------------------------------------------------------------------------------------------------------------------------------------------------------------------------------------------------------------------------------------------------------------------------------------------------------------------------------------------------------------------------------------------------------------------------------------------------------------------|-------------------------------------------------------------------------------------------------------------------------------------------------------------------------------------------------------------------------------------------------------------------------------------------------------------------------------------------------------------------------------------------------------------------------------|
| Gao et al. (2022)           |                                                                                                                                                                                                                                                                                                                                                                                                                                                                                                                                                                                                                                                                                                                                                                                                                                                                |                                                                                                                                                                                                                                                                                                                                                                                                                               |
| Study characteristics       | <ul style="list-style-type: none"> <li>Study type: retrospective, case-control, single-center study</li> <li>Study duration: January 2016 to May 2020</li> <li>Country: China</li> </ul>                                                                                                                                                                                                                                                                                                                                                                                                                                                                                                                                                                                                                                                                       |                                                                                                                                                                                                                                                                                                                                                                                                                               |
| Participant characteristics | <ul style="list-style-type: none"> <li>No. of subjects: 672 AA</li> <li>Age: <math>31.28 \pm 14.42</math> years</li> <li>Gender: Male 396 (58.92%), female 276 (41.08%)</li> <li>Ethnicity: N/A</li> <li>BMI: N/A</li> <li>Comorbidity: N/A</li> <li>Smoking: N/A</li> <li>Alcohol: N/A</li> <li>Skin type: N/A</li> <li>Diet: N/A</li> <li>Sun-exposure/ sunscreen usage: N/A</li> <li>Disease duration: N/A</li> <li>Disease severity score/ grading: N/A</li> <li>Alopecia pattern: N/A</li> <li>FH of alopecia: N/A</li> <li>Nail involvement: N/A</li> <li>First/ recurrent episode: N/A</li> <li>Stable/ active disease: N/A</li> <li>Treatment information: N/A</li> <li>Diagnosis and severity assessment: diagnosed according to the revised standards of the American Journal of Dermatology (AAD), which was established by Olsen et al.</li> </ul> | <ul style="list-style-type: none"> <li>No. of subjects: 580 healthy subjects (age- and sex-matched)</li> <li>Age: <math>30.89 \pm 13.0</math> years</li> <li>Gender: Male 342 (58.97%), female 238 (41.03%)</li> <li>Ethnicity: N/A</li> <li>BMI: N/A</li> <li>Comorbidity: N/A</li> <li>Smoking: N/A</li> <li>Alcohol: N/A</li> <li>Skin type: N/A</li> <li>Diet: N/A</li> <li>Sun-exposure/ sunscreen usage: N/A</li> </ul> |
| Vitamin D data              | <ul style="list-style-type: none"> <li>VDD: 102 (15.18%)</li> <li>VDI: 479 (71.28%)</li> <li>Normal 91 (13.54%)</li> <li>Level: <math>15.73 \pm 2.38</math> ng/ml</li> <li>Correlation: N/A</li> </ul>                                                                                                                                                                                                                                                                                                                                                                                                                                                                                                                                                                                                                                                         | <ul style="list-style-type: none"> <li>VDD: 37 (6.38%)</li> <li>VDI: 485 (83.62%)</li> <li>Normal 58 (10.00%)</li> <li>Level: <math>23.63 \pm 6.54</math> ng/ml</li> </ul>                                                                                                                                                                                                                                                    |
| Vitamin D measurement       | <ul style="list-style-type: none"> <li>Definition: VDD: <math>&lt; 8</math> ng/ml, VDI: <math>8-30.5</math> ng/ml, normal <math>&gt; 30.5</math> ng/ml</li> <li>Measurement method: enzyme-linked immunosorbent assay method with a Rayto RT-6100 automatic enzyme-labeled instrument and a chemiluminescence immunoassay device (Siemens Centaur XP).</li> </ul>                                                                                                                                                                                                                                                                                                                                                                                                                                                                                              |                                                                                                                                                                                                                                                                                                                                                                                                                               |
| Other                       | <ul style="list-style-type: none"> <li>Exclusion criteria: Patients who were pregnant or lactating, had other immune diseases, or had incomplete clinical information were excluded</li> </ul>                                                                                                                                                                                                                                                                                                                                                                                                                                                                                                                                                                                                                                                                 |                                                                                                                                                                                                                                                                                                                                                                                                                               |

| Goksin (2022)               |                                                                                                                                                                                                                                                                                                                                                                                                                                                                                                                                                                                                                                                                                                                                                                                                                                                                                                                                                  |
|-----------------------------|--------------------------------------------------------------------------------------------------------------------------------------------------------------------------------------------------------------------------------------------------------------------------------------------------------------------------------------------------------------------------------------------------------------------------------------------------------------------------------------------------------------------------------------------------------------------------------------------------------------------------------------------------------------------------------------------------------------------------------------------------------------------------------------------------------------------------------------------------------------------------------------------------------------------------------------------------|
| Study characteristics       | <ul style="list-style-type: none"> <li>• Study type: retrospective, descriptive cross-sectional, single-center study</li> <li>• Study duration: January 1, 2016 to August 31, 2020</li> <li>• Country: Turkey</li> </ul>                                                                                                                                                                                                                                                                                                                                                                                                                                                                                                                                                                                                                                                                                                                         |
| Participant characteristics | <ul style="list-style-type: none"> <li>• No. of subjects: 218 AA</li> <li>• Age: <math>27.8 \pm 12.3</math> years</li> <li>• Gender: Male 134 (61.5%), Female 84 (38.5%)</li> <li>• Ethnicity: N/A</li> <li>• BMI: N/A</li> <li>• Comorbidity: Comorbid diseases 51.8%</li> <li>• Smoking: N/A</li> <li>• Alcohol: N/A</li> <li>• Skin type: N/A</li> <li>• Diet: N/A</li> <li>• Sun-exposure/ sunscreen usage: N/A</li> <li>• Disease duration: mean 18.1 months (range 1-240 months)</li> <li>• Disease severity score/ grading: N/A</li> <li>• Alopecia pattern: AA 96.3%, AU 3.2%, AT 0.5%, unifocal involvement was more frequent, number of patch was 1 in most of the patients with AA</li> <li>• FH of alopecia: N/A</li> <li>• Nail involvement: N/A</li> <li>• First/ recurrent episode: N/A</li> <li>• Stable/ active disease: N/A</li> <li>• Treatment information: N/A</li> <li>• Diagnosis and severity assessment: N/A</li> </ul> |
| Vitamin D data              | <ul style="list-style-type: none"> <li>• VDD: 85 (38.9 %)</li> <li>• Level: <math>15.97 \pm 6.52</math> ng/ml</li> <li>• Correlation: N/A</li> </ul>                                                                                                                                                                                                                                                                                                                                                                                                                                                                                                                                                                                                                                                                                                                                                                                             |
| Vitamin D measurement       | <ul style="list-style-type: none"> <li>• Definition: No VDD: definition</li> <li>• Measurement method: N/A</li> </ul>                                                                                                                                                                                                                                                                                                                                                                                                                                                                                                                                                                                                                                                                                                                                                                                                                            |
| Other                       | <ul style="list-style-type: none"> <li>• Exclusion criteria: N/A</li> </ul>                                                                                                                                                                                                                                                                                                                                                                                                                                                                                                                                                                                                                                                                                                                                                                                                                                                                      |

| Krysiak et al. (2022)       |                                                                                                                                                                                                                                                                                                                                                                                                                                                                                                                                                                                                                                                                                                                                                                                                                                                                                              |                                                                                                                                                                                                                                                                                                                                                                                                                                                                                                                                                                             |
|-----------------------------|----------------------------------------------------------------------------------------------------------------------------------------------------------------------------------------------------------------------------------------------------------------------------------------------------------------------------------------------------------------------------------------------------------------------------------------------------------------------------------------------------------------------------------------------------------------------------------------------------------------------------------------------------------------------------------------------------------------------------------------------------------------------------------------------------------------------------------------------------------------------------------------------|-----------------------------------------------------------------------------------------------------------------------------------------------------------------------------------------------------------------------------------------------------------------------------------------------------------------------------------------------------------------------------------------------------------------------------------------------------------------------------------------------------------------------------------------------------------------------------|
| Study characteristics       | <ul style="list-style-type: none"> <li>• Study type: prospective, case-control, single-center study</li> <li>• Study duration: N/A</li> <li>• Country: Poland</li> </ul>                                                                                                                                                                                                                                                                                                                                                                                                                                                                                                                                                                                                                                                                                                                     |                                                                                                                                                                                                                                                                                                                                                                                                                                                                                                                                                                             |
| Participant characteristics | <ul style="list-style-type: none"> <li>• No. of subjects: 72 MAGA patients</li> <li>• Age: <math>37 \pm 6</math> years</li> <li>• Gender: Male 72 (100%)</li> <li>• Ethnicity: N/A</li> <li>• Smoking 35%</li> <li>• BMI: <math>32.9 \pm 5.3</math> kg/m<sup>2</sup></li> <li>• Comorbidity: N/A</li> <li>• Smoking: N/A</li> <li>• Alcohol: N/A</li> <li>• Skin type: N/A</li> <li>• Diet: N/A</li> <li>• Sun-exposure/ sunscreen usage: N/A</li> <li>• Disease duration: N/A</li> <li>• Disease severity score/ grading: Norwood modification of Hamilton Classification Scale for androgenic alopecia</li> <li>• Alopecia pattern: N/A</li> <li>• FH of alopecia: N/A</li> <li>• Nail involvement: N/A</li> <li>• First/ recurrent episode: N/A</li> <li>• Stable/ active disease: N/A</li> <li>• Treatment information: N/A</li> <li>• Diagnosis and severity assessment: N/A</li> </ul> | <ul style="list-style-type: none"> <li>• No. of subjects: 75 subjects with normal hair growth (age, gender, BMI, blood pressure, plasma lipid levels and glucose homeostasis markers-matched)</li> <li>• Age: <math>38 \pm 6</math> years</li> <li>• Gender: Male 75 (100%)</li> <li>• Ethnicity: N/A</li> <li>• Smoking 34%</li> <li>• BMI: <math>32.4 \pm 5.1</math> kg/m<sup>2</sup></li> <li>• Comorbidity: N/A</li> <li>• Smoking: N/A</li> <li>• Alcohol: N/A</li> <li>• Skin type: N/A</li> <li>• Diet: N/A</li> <li>• Sun-exposure/ sunscreen usage: N/A</li> </ul> |
| Vitamin D data              | <ul style="list-style-type: none"> <li>• VDD: N/A</li> <li>• Level: <math>59.0 \pm 12.8</math> nmol/l → <math>23.6 \pm 5.12</math> ng/ml</li> <li>• Correlation: N/A</li> </ul>                                                                                                                                                                                                                                                                                                                                                                                                                                                                                                                                                                                                                                                                                                              | <ul style="list-style-type: none"> <li>• VDD: N/A</li> <li>• Level: <math>69.4 \pm 14.5</math> nmol/l → <math>27.76 \pm 5.8</math> ng/ml</li> </ul>                                                                                                                                                                                                                                                                                                                                                                                                                         |
| Vitamin D measurement       | <ul style="list-style-type: none"> <li>• Definition: N/A</li> <li>• Measurement method: Electrochemiluminescent analyzer (Cobas e411, Roche Diagnostics, Mannheim, Germany).</li> </ul>                                                                                                                                                                                                                                                                                                                                                                                                                                                                                                                                                                                                                                                                                                      |                                                                                                                                                                                                                                                                                                                                                                                                                                                                                                                                                                             |
| Other                       | <ul style="list-style-type: none"> <li>• Inclusion criteria: men (25–50 years old) with: (a) body mass index (BMI) at least 24 kg/m<sup>2</sup>, (b) plasma glucose concentration 2 h after 75-g glucose challenge in the range between 140 and 200 mg/dL, and (c) fasting plasma glucose levels in the range between 95 and 125 mg/dL</li> <li>• The exclusion criteria were as follows: diabetes, thyroid disorders or other endocrine disorders; kidney or liver insufficiency; chronic inflammatory or autoimmune disorders; malabsorption syndromes; cardiovascular disease (with the exception of mild arterial hypertension) and other serious disorders. We also excluded individuals treated within 6 months preceding the study with any prescription or over-the-counter drug for more than a week.</li> </ul>                                                                    |                                                                                                                                                                                                                                                                                                                                                                                                                                                                                                                                                                             |

|  |                                                                                               |
|--|-----------------------------------------------------------------------------------------------|
|  | <ul style="list-style-type: none"><li>• Vitamin D levels were converted from nmol/L</li></ul> |
|--|-----------------------------------------------------------------------------------------------|

|                             |                                                                                                                                                                                                                                                                                                                                                                                                                                                                                                                                                                                                                                                                                                                                                              |
|-----------------------------|--------------------------------------------------------------------------------------------------------------------------------------------------------------------------------------------------------------------------------------------------------------------------------------------------------------------------------------------------------------------------------------------------------------------------------------------------------------------------------------------------------------------------------------------------------------------------------------------------------------------------------------------------------------------------------------------------------------------------------------------------------------|
| Lim et al. (2022)           |                                                                                                                                                                                                                                                                                                                                                                                                                                                                                                                                                                                                                                                                                                                                                              |
| Study characteristics       | <ul style="list-style-type: none"> <li>• Study type: descriptive cross-sectional, single-center study</li> <li>• Study duration: January 2015 and December 2017</li> <li>• Country: USA</li> </ul>                                                                                                                                                                                                                                                                                                                                                                                                                                                                                                                                                           |
| Participant characteristics | <ul style="list-style-type: none"> <li>• No. of patients: 96 AA (pediatric)</li> <li>• Age: <math>9 \pm 4.4</math> years</li> <li>• Gender: Female (64%)</li> <li>• Ethnicity: White (48%)</li> <li>• BMI: N/A</li> <li>• Comorbidity: N/A</li> <li>• Smoking: N/A</li> <li>• Alcohol: N/A</li> <li>• Skin type: N/A</li> <li>• Diet: N/A</li> <li>• Sun-exposure/ sunscreen usage: N/A</li> <li>• Disease duration: N/A</li> <li>• Disease severity score/ grading: N/A</li> <li>• Alopecia pattern: N/A</li> <li>• FH of alopecia: N/A</li> <li>• Nail involvement: N/A</li> <li>• First/ recurrent episode: N/A</li> <li>• Stable/ active disease: N/A</li> <li>• Treatment information: N/A</li> <li>• Diagnosis and severity assessment: N/A</li> </ul> |
| Vitamin D data              | <ul style="list-style-type: none"> <li>• VDD: 37 (38.2%)</li> <li>• VDI: 58 (60.4%)</li> <li>• Level: <math>26.7 \pm 7.6</math> ng/ml</li> <li>• Correlation: N/A</li> </ul>                                                                                                                                                                                                                                                                                                                                                                                                                                                                                                                                                                                 |
| Vitamin D measurement       | <ul style="list-style-type: none"> <li>• Defintion: VDD: &lt;20 ng/ml, VDI: 21-29 ng/ml</li> <li>• Measurement method: N/A</li> </ul>                                                                                                                                                                                                                                                                                                                                                                                                                                                                                                                                                                                                                        |
| Other                       | <ul style="list-style-type: none"> <li>• Exclusion criteria: documented vitamin supplementation, chronic illness, or other autoimmune comorbidities other than AA</li> <li>• Cited reference (J Clin Endocrinol Metab, July 2011, 96(7):1911–1930) was explored for VDD and VDI definitions</li> </ul>                                                                                                                                                                                                                                                                                                                                                                                                                                                       |



| Oner and Akdeniz (2022)     |                                                                                                                                                                                                                                                                                                                                                                                                                                                                                                                                                                                                                                                                                                                                                                       |                                                                                                                                                                                                                                                                                                                                                                                                                                                                                                                                                                                                                                                                                                                                                          |                                                                                                                                                                                                                                                                                                                                                                                                                                                                                                                                                                                                         |  |
|-----------------------------|-----------------------------------------------------------------------------------------------------------------------------------------------------------------------------------------------------------------------------------------------------------------------------------------------------------------------------------------------------------------------------------------------------------------------------------------------------------------------------------------------------------------------------------------------------------------------------------------------------------------------------------------------------------------------------------------------------------------------------------------------------------------------|----------------------------------------------------------------------------------------------------------------------------------------------------------------------------------------------------------------------------------------------------------------------------------------------------------------------------------------------------------------------------------------------------------------------------------------------------------------------------------------------------------------------------------------------------------------------------------------------------------------------------------------------------------------------------------------------------------------------------------------------------------|---------------------------------------------------------------------------------------------------------------------------------------------------------------------------------------------------------------------------------------------------------------------------------------------------------------------------------------------------------------------------------------------------------------------------------------------------------------------------------------------------------------------------------------------------------------------------------------------------------|--|
| Study characteristics       | <ul style="list-style-type: none"> <li>Study type: retrospective, descriptive cross-sectional, single-center study</li> <li>Study duration: November 2018 and January 2021</li> <li>Country: Turkey</li> </ul>                                                                                                                                                                                                                                                                                                                                                                                                                                                                                                                                                        |                                                                                                                                                                                                                                                                                                                                                                                                                                                                                                                                                                                                                                                                                                                                                          |                                                                                                                                                                                                                                                                                                                                                                                                                                                                                                                                                                                                         |  |
| Participant characteristics | <ul style="list-style-type: none"> <li>No. of patients: 99 AA</li> <li>Age: <math>26.1 \pm 12.3</math> years</li> <li>Gender: Female 25 (25.3 %), male 74 (74.7 %)</li> <li>Ethnicity: N/A</li> <li>BMI: N/A</li> <li>Comorbidity: N/A</li> <li>Smoking: N/A</li> <li>Alcohol: N/A</li> <li>Skin type: N/A</li> <li>Diet: N/A</li> <li>Sun-exposure/ sunscreen usage: N/A</li> <li>Disease duration: N/A</li> <li>Disease severity score/ grading: N/A</li> <li>Alopecia pattern: N/A</li> <li>FH of alopecia: N/A</li> <li>Nail involvement: N/A</li> <li>First/ recurrent episode: N/A</li> <li>Stable/ active disease: N/A</li> <li>Treatment information: N/A</li> <li>Diagnosis and severity assessment: dermatology outpatient clinics and inpatient</li> </ul> | <ul style="list-style-type: none"> <li>No. of patients: 101 AGA</li> <li>Age: <math>25.6 \pm 7.3</math> years</li> <li>Gender: Female 25 (24.8 %), male 76 (75.2 %)</li> <li>Ethnicity: N/A</li> <li>BMI: N/A</li> <li>Comorbidity: N/A</li> <li>Smoking: N/A</li> <li>Alcohol: N/A</li> <li>Skin type: N/A</li> <li>Diet: N/A</li> <li>Sun-exposure/ sunscreen usage: N/A</li> <li>Disease duration: N/A</li> <li>Disease severity score/ grading: N/A</li> <li>Alopecia pattern: N/A</li> <li>FH of alopecia: N/A</li> <li>Nail involvement: N/A</li> <li>First/ recurrent episode: N/A</li> <li>Stable/ active disease: N/A</li> <li>Treatment information: N/A</li> <li>Diagnosis and severity assessment: dermatology outpatient clinics</li> </ul> | <ul style="list-style-type: none"> <li>No. of patients: 160 TE</li> <li>Age: <math>27.7 \pm 8.8</math> years</li> <li>Gender: Female 156 (97.5 %), male 4 (2.5 %)</li> <li>Ethnicity: N/A</li> <li>BMI: N/A</li> <li>Comorbidity: N/A</li> <li>Smoking: N/A</li> <li>Alcohol: N/A</li> <li>Skin type: N/A</li> <li>Diet: N/A</li> <li>Sun-exposure/ sunscreen usage: N/A</li> <li>Disease duration: N/A</li> <li>Disease severity score/ grading: N/A</li> <li>Alopecia pattern: N/A</li> <li>FH of alopecia: N/A</li> <li>Diagnosis and severity assessment: dermatology outpatient clinics</li> </ul> |  |
| Vitamin D data              | <ul style="list-style-type: none"> <li>VDD: 70 (70.7 %)</li> <li>Level: <math>15.7 \pm 9.6</math> ng/ml</li> <li>Correlation: N/A</li> </ul>                                                                                                                                                                                                                                                                                                                                                                                                                                                                                                                                                                                                                          | <ul style="list-style-type: none"> <li>VDD: 79 (78.2 %)</li> <li>Level: <math>16.2 \pm 8.4</math> ng/ml</li> <li>Correlation: N/A</li> </ul>                                                                                                                                                                                                                                                                                                                                                                                                                                                                                                                                                                                                             | <ul style="list-style-type: none"> <li>VDD: 127 (79.4 %)</li> <li>Level: <math>14.6 \pm 11.1</math> ng/ml</li> <li>Correlation: N/A</li> </ul>                                                                                                                                                                                                                                                                                                                                                                                                                                                          |  |
| Vitamin D measurement       | <ul style="list-style-type: none"> <li>Definition: VDD: <math>&lt; 20</math> ng/ml</li> <li>Measurement method: Atellica Solution Immunoassay, Siemens, USA.</li> </ul>                                                                                                                                                                                                                                                                                                                                                                                                                                                                                                                                                                                               |                                                                                                                                                                                                                                                                                                                                                                                                                                                                                                                                                                                                                                                                                                                                                          |                                                                                                                                                                                                                                                                                                                                                                                                                                                                                                                                                                                                         |  |
| Other                       | <ul style="list-style-type: none"> <li>Selection criteria: N/A</li> </ul>                                                                                                                                                                                                                                                                                                                                                                                                                                                                                                                                                                                                                                                                                             |                                                                                                                                                                                                                                                                                                                                                                                                                                                                                                                                                                                                                                                                                                                                                          |                                                                                                                                                                                                                                                                                                                                                                                                                                                                                                                                                                                                         |  |

|                             |                                                                                                                                                                                                                                                                                                                                                                                                                                                                                                                                                                                                                                                                                                                                                                                                |                                                                                                                                                                                                                                                                                                                                                                                                                                                                                                                                                                                                                                                                  |                                                                                                                                                                                                                                                                                                                                                                                                                                                                                                       |  |
|-----------------------------|------------------------------------------------------------------------------------------------------------------------------------------------------------------------------------------------------------------------------------------------------------------------------------------------------------------------------------------------------------------------------------------------------------------------------------------------------------------------------------------------------------------------------------------------------------------------------------------------------------------------------------------------------------------------------------------------------------------------------------------------------------------------------------------------|------------------------------------------------------------------------------------------------------------------------------------------------------------------------------------------------------------------------------------------------------------------------------------------------------------------------------------------------------------------------------------------------------------------------------------------------------------------------------------------------------------------------------------------------------------------------------------------------------------------------------------------------------------------|-------------------------------------------------------------------------------------------------------------------------------------------------------------------------------------------------------------------------------------------------------------------------------------------------------------------------------------------------------------------------------------------------------------------------------------------------------------------------------------------------------|--|
| Tran et al. (2022)          |                                                                                                                                                                                                                                                                                                                                                                                                                                                                                                                                                                                                                                                                                                                                                                                                |                                                                                                                                                                                                                                                                                                                                                                                                                                                                                                                                                                                                                                                                  |                                                                                                                                                                                                                                                                                                                                                                                                                                                                                                       |  |
| Study characteristics       | <ul style="list-style-type: none"> <li>Study type: retrospective, case-control study, University of California, Los Angeles Health System</li> <li>Study duration: 2013 to 2017</li> <li>Country: USA</li> </ul>                                                                                                                                                                                                                                                                                                                                                                                                                                                                                                                                                                               |                                                                                                                                                                                                                                                                                                                                                                                                                                                                                                                                                                                                                                                                  |                                                                                                                                                                                                                                                                                                                                                                                                                                                                                                       |  |
| Participant characteristics | <ul style="list-style-type: none"> <li>No. of subjects: 417 AA</li> <li>Age: mean 45.7 years</li> <li>Gender: Female 561 (61.6%), male 349 (38.4 %)</li> <li>Ethnicity: White 378 (41.5 %), asian 124 (13.6 %), black 60 (6.5 %), other/unknown 348 (38.2 %)</li> <li>BMI: N/A</li> <li>Comorbidity: N/A</li> <li>Smoking: N/A</li> <li>Alcohol: N/A</li> <li>Skin type: N/A</li> <li>Diet: N/A</li> <li>Sun-exposure/ sunscreen usage: N/A</li> <li>Disease duration: N/A</li> <li>Disease severity score/ grading: N/A</li> <li>Alopecia pattern: N/A</li> <li>FH of alopecia: N/A</li> <li>Nail involvement: N/A</li> <li>First/ recurrent episode: N/A</li> <li>Stable/ active disease: N/A</li> <li>Treatment information: N/A</li> <li>Diagnosis and severity assessment: N/A</li> </ul> | <ul style="list-style-type: none"> <li>No. of subjects: 404 AGA</li> <li>Age: N/A</li> <li>Gender: N/A</li> <li>Ethnicity: N/A</li> <li>BMI: N/A</li> <li>Comorbidity: N/A</li> <li>Smoking: N/A</li> <li>Alcohol: N/A</li> <li>Skin type: N/A</li> <li>Diet: N/A</li> <li>Sun-exposure/ sunscreen usage: N/A</li> <li>Disease duration: N/A</li> <li>Disease severity score/ grading: N/A</li> <li>Alopecia pattern: N/A</li> <li>FH of alopecia: N/A</li> <li>Nail involvement: N/A</li> <li>First/ recurrent episode: N/A</li> <li>Stable/ active disease: N/A</li> <li>Treatment information: N/A</li> <li>Diagnosis and severity assessment: N/A</li> </ul> | <ul style="list-style-type: none"> <li>No. of subjects: 3127 controls (age-, gender-, and race-matched)</li> <li>Age: mean 49.4 years</li> <li>Gender: Female 3685 (74.5 %), male 1260 (25.5 %)</li> <li>Ethnicity: White 2862 (57.9 %), asian 373 (7.5 %), black 506 (10.2 %), other/unknown 1204 (24.3 %)</li> <li>BMI: N/A</li> <li>Comorbidity: N/A</li> <li>Smoking: N/A</li> <li>Alcohol: N/A</li> <li>Skin type: N/A</li> <li>Diet: N/A</li> <li>Sun-exposure/ sunscreen usage: N/A</li> </ul> |  |
| Vitamin D data              | <ul style="list-style-type: none"> <li>VDD: 115 (27.6%)</li> <li>VDI: 138 (33.1 %)</li> <li>Normal: 164 (39.3 %)</li> <li>Level: 28.7 ± 12.1 ng/ml</li> <li>Correlation: N/A</li> </ul>                                                                                                                                                                                                                                                                                                                                                                                                                                                                                                                                                                                                        | <ul style="list-style-type: none"> <li>VDD: 63 (15.6 %)</li> <li>VDI: 138 (34.2 %)</li> <li>Normal 203 (50.2 %)</li> <li>Level: 31.6 ± 12.8 ng/ml</li> <li>Correlation: N/A</li> </ul>                                                                                                                                                                                                                                                                                                                                                                                                                                                                           | <ul style="list-style-type: none"> <li>VDD: 924 (29.5%)</li> <li>VDI: 1294 (41.4 %)</li> <li>Normal 909 (29.1 %)</li> <li>Level: 25.8 ± 10.9 ng/ml</li> <li>Correlation: N/A</li> </ul>                                                                                                                                                                                                                                                                                                               |  |
| Vitamin D measurement       | <ul style="list-style-type: none"> <li>Definition: 0-10 ng/ml, 11-20 ng/ml, 21-30 ng/ml, &gt;30 ng/ml were used as cutoffs, and data were grouped and re-defined as VDD &lt; 20 ng/ml, VDI 21-30 ng/ml, normal &gt; 30 ng/ml</li> <li>Measurement method: N/A</li> </ul>                                                                                                                                                                                                                                                                                                                                                                                                                                                                                                                       |                                                                                                                                                                                                                                                                                                                                                                                                                                                                                                                                                                                                                                                                  |                                                                                                                                                                                                                                                                                                                                                                                                                                                                                                       |  |

|       |                                                                                                      |
|-------|------------------------------------------------------------------------------------------------------|
| Other | <ul style="list-style-type: none"><li>• Exclusion criteria: active Vitamin D prescriptions</li></ul> |
|-------|------------------------------------------------------------------------------------------------------|

|                             |                                                                                                                                                                                                                                                                                                                                                                                                                                                                                                                                                                                                                                                                                                                                                                                                                                                                                                                       |
|-----------------------------|-----------------------------------------------------------------------------------------------------------------------------------------------------------------------------------------------------------------------------------------------------------------------------------------------------------------------------------------------------------------------------------------------------------------------------------------------------------------------------------------------------------------------------------------------------------------------------------------------------------------------------------------------------------------------------------------------------------------------------------------------------------------------------------------------------------------------------------------------------------------------------------------------------------------------|
| Yorulmaz et al. (2022)      |                                                                                                                                                                                                                                                                                                                                                                                                                                                                                                                                                                                                                                                                                                                                                                                                                                                                                                                       |
| Study characteristics       | <ul style="list-style-type: none"> <li>• Study type: retrospective descriptive, single-center study</li> <li>• Study duration: July 2014 and July 2018</li> <li>• Country: Turkey</li> </ul>                                                                                                                                                                                                                                                                                                                                                                                                                                                                                                                                                                                                                                                                                                                          |
| Participant characteristics | <ul style="list-style-type: none"> <li>• No. of subjects: 3028 acute and chronic TE (1688 with vitamin D results)</li> <li>• Age: median 26 years (IQR 20–37)</li> <li>• Gender: Female 2794 (92.3 %), male 234 (7.7 %)</li> <li>• Ethnicity: N/A</li> <li>• BMI: N/A</li> <li>• Comorbidity: N/A</li> <li>• Smoking: N/A</li> <li>• Alcohol: N/A</li> <li>• Skin type: N/A</li> <li>• Diet: N/A</li> <li>• Sun-exposure/ sunscreen usage: N/A</li> <li>• Disease duration: N/A</li> <li>• Disease severity score/ grading: N/A</li> <li>• Alopecia pattern: N/A</li> <li>• FH of alopecia: N/A</li> <li>• Nail involvement: N/A</li> <li>• First/ recurrent episode: N/A</li> <li>• Stable/ active disease: N/A</li> <li>• Treatment information: N/A</li> <li>• Diagnosis and severity assessment: medical electronic database of Dermatology department of Ankara Numune Research and Training hospital</li> </ul> |
| Vitamin D data              | <ul style="list-style-type: none"> <li>• VDD: 1219 (72.2 %)</li> <li>• Level: median 14 (IQR 9.77–20.39) ng/ml → <math>14.72 \pm 7.87</math> ng/ml</li> <li>• Correlation: N/A</li> </ul>                                                                                                                                                                                                                                                                                                                                                                                                                                                                                                                                                                                                                                                                                                                             |
| Vitamin D measurement       | <ul style="list-style-type: none"> <li>• Definition: VDD &lt; 20 ng/ml</li> <li>• Measurement method: N/A</li> </ul>                                                                                                                                                                                                                                                                                                                                                                                                                                                                                                                                                                                                                                                                                                                                                                                                  |
| Other                       | <ul style="list-style-type: none"> <li>• Inclusion criteria: included patients with acute and chronic TE, of whom diagnosis was confirmed by pull test, trichogram, and trichoscopy</li> </ul>                                                                                                                                                                                                                                                                                                                                                                                                                                                                                                                                                                                                                                                                                                                        |

|                             |                                                                                                                                                                                                                                                                                                                                                                                                                                                                                                                                                                                                                                                                                                                                                                                                                                                                                                                                                                                                                                       |                                                                                                                                                                                                                                                                                                                                                                                                                                                                           |
|-----------------------------|---------------------------------------------------------------------------------------------------------------------------------------------------------------------------------------------------------------------------------------------------------------------------------------------------------------------------------------------------------------------------------------------------------------------------------------------------------------------------------------------------------------------------------------------------------------------------------------------------------------------------------------------------------------------------------------------------------------------------------------------------------------------------------------------------------------------------------------------------------------------------------------------------------------------------------------------------------------------------------------------------------------------------------------|---------------------------------------------------------------------------------------------------------------------------------------------------------------------------------------------------------------------------------------------------------------------------------------------------------------------------------------------------------------------------------------------------------------------------------------------------------------------------|
| Abedini et al. (2021)       |                                                                                                                                                                                                                                                                                                                                                                                                                                                                                                                                                                                                                                                                                                                                                                                                                                                                                                                                                                                                                                       |                                                                                                                                                                                                                                                                                                                                                                                                                                                                           |
| Study characteristics       | <ul style="list-style-type: none"> <li>Study type: case-control, single-center study</li> <li>Study duration: October 2016 to December 2017</li> <li>Country: Iran</li> </ul>                                                                                                                                                                                                                                                                                                                                                                                                                                                                                                                                                                                                                                                                                                                                                                                                                                                         |                                                                                                                                                                                                                                                                                                                                                                                                                                                                           |
| Participant characteristics | <ul style="list-style-type: none"> <li>No. of subjects: 50 AA patients</li> <li>Age: <math>32.48 \pm 12.61</math> years</li> <li>Gender: Female 23 (46 %), male 27 (54 %)</li> <li>Ethnicity: N/A</li> <li>BMI: <math>25.75 \pm 4.58</math> kg/m<sup>2</sup></li> <li>Comorbidity: history of atopy 15 (30 %)</li> <li>Smoking: 0</li> <li>Alcohol: N/A</li> <li>Skin type: N/A</li> <li>Diet: N/A</li> <li>Sun-exposure/ sunscreen usage: N/A</li> <li>Disease duration: <math>76.32 \pm 94.13</math> months</li> <li>Disease severity score/ grading: mean SALT score of patients was <math>67.9 \pm 35.47</math> % (range 3-100 %)</li> <li>Alopecia pattern: Patchy 17, Ophiasis 6 (12 %), AT 9 (18 %), AU 18 (36 %), Eyebrow 35, eyelash 25, beard 20</li> <li>FH of alopecia: FH of AA 8</li> <li>Nail involvement: 28</li> <li>First/ recurrent episode: N/A</li> <li>Stable/ active disease: Pull test positive 16</li> <li>Treatment information: N/A</li> <li>Diagnosis and severity assessment: alopecia clinic</li> </ul> | <ul style="list-style-type: none"> <li>No. of subjects: 50 controls (age, sex, BMI - matched)</li> <li>Age: <math>32.26 \pm 12.32</math> years</li> <li>Gender: Female 23 (46 %), male 27 (54 %)</li> <li>Ethnicity: N/A</li> <li>BMI: <math>25.79 \pm 4.35</math> kg/m<sup>2</sup></li> <li>Comorbidity: history of atopy 28</li> <li>Smoking: 0</li> <li>Alcohol: N/A</li> <li>Skin type: N/A</li> <li>Diet: N/A</li> <li>Sun-exposure/ sunscreen usage: N/A</li> </ul> |
| Vitamin D data              | <ul style="list-style-type: none"> <li>VDD: 28 (56 %)</li> <li>VDI: 16 (32 %)</li> <li>Normal 6 (12 %)</li> <li>Level: <math>18.32 \pm 8.55</math> ng/ml</li> <li>Correlation: Vitamin D depletion was not correlated with the severity, duration, or activity phase of the disease or the type of hair loss.</li> </ul>                                                                                                                                                                                                                                                                                                                                                                                                                                                                                                                                                                                                                                                                                                              | <ul style="list-style-type: none"> <li>VDD: 23 (46 %)</li> <li>VDI: 14 (28 %)</li> <li>Normal 13 (26 %)</li> <li>Level: <math>23.21 \pm 8.71</math> ng/ml</li> </ul>                                                                                                                                                                                                                                                                                                      |
| Vitamin D measurement       | <ul style="list-style-type: none"> <li>Definitions: VDD: &lt; 20 ng/ml, VDI: 20 to 30 ng/ml</li> <li>Measurement method: Commercial Enzyme-Linked Immunosorbent Assay (ELISA) kits (LIAISON, Italy), which quantitatively determine the 25-(OH)-D3 level via chemiluminescent immunoassay (CLIA) technology.</li> </ul>                                                                                                                                                                                                                                                                                                                                                                                                                                                                                                                                                                                                                                                                                                               |                                                                                                                                                                                                                                                                                                                                                                                                                                                                           |
| Other                       | <ul style="list-style-type: none"> <li>Exclusion criteria: a history of intralesional steroids' injection within the last month; use of systemic corticosteroids within the last year; use of immunosuppressive drugs within the last three months; calcium and vitamin D supplementation; consumption of</li> </ul>                                                                                                                                                                                                                                                                                                                                                                                                                                                                                                                                                                                                                                                                                                                  |                                                                                                                                                                                                                                                                                                                                                                                                                                                                           |

|  |                                                                                                                                                                             |
|--|-----------------------------------------------------------------------------------------------------------------------------------------------------------------------------|
|  | bisphosphonates or cholesterol-lowering drugs; phototherapy treatment; pregnancy or lactation; and any coexisting inflammatory disease other than AA, diabetes, or smoking. |
|--|-----------------------------------------------------------------------------------------------------------------------------------------------------------------------------|

| Alamoudi et al. (2021)      |                                                                                                                                                                                                                                                                                                                                                                                                                                                                                                                                                                                                                                                                                                                                                                                                                                                                                                                                              |
|-----------------------------|----------------------------------------------------------------------------------------------------------------------------------------------------------------------------------------------------------------------------------------------------------------------------------------------------------------------------------------------------------------------------------------------------------------------------------------------------------------------------------------------------------------------------------------------------------------------------------------------------------------------------------------------------------------------------------------------------------------------------------------------------------------------------------------------------------------------------------------------------------------------------------------------------------------------------------------------|
| Study characteristics       | <ul style="list-style-type: none"> <li>• Study type: retrospective descriptive, single-center study</li> <li>• Study duration: N/A</li> <li>• Country: Saudi Arabia</li> </ul>                                                                                                                                                                                                                                                                                                                                                                                                                                                                                                                                                                                                                                                                                                                                                               |
| Participant characteristics | <ul style="list-style-type: none"> <li>• No. of subjects: 177 AA patients</li> <li>• Age: <math>28.37 \pm 12.68</math> years</li> <li>• Gender: Male 85 (48%), female 92 (52%)</li> <li>• Ethnicity: N/A</li> <li>• BMI: <math>26.44 \pm 7.5</math> kg/m<sup>2</sup></li> <li>• Comorbidity: At least 1 comorbidity 92 (52.0 %)</li> <li>• Smoking: N/A</li> <li>• Alcohol: N/A</li> <li>• Skin type: N/A</li> <li>• Diet: N/A</li> <li>• Sun-exposure/ sunscreen usage: N/A</li> <li>• Disease duration: N/A</li> <li>• Disease severity score/ grading: N/A</li> <li>• Alopecia pattern: Patchy (60.45%), AU (9%), AT (7%)</li> <li>• FH of alopecia: N/A</li> <li>• Nail involvement: N/A</li> <li>• First/ recurrent episode: N/A</li> <li>• Stable/ active disease: active disease 67 (37.8%), stable 49 (27.7%), unknown 61 (34.5%)</li> <li>• Treatment information: N/A</li> <li>• Diagnosis and severity assessment: N/A</li> </ul> |
| Vitamin D data              | <ul style="list-style-type: none"> <li>• VDD: 110 (62%)</li> <li>• Level: <math>49.14 \pm 29.09</math> nmol/L ➔ <math>19.69 \pm 11.65</math> ng/mL</li> <li>• Correlation: N/A</li> </ul>                                                                                                                                                                                                                                                                                                                                                                                                                                                                                                                                                                                                                                                                                                                                                    |
| Vitamin D measurement       | <ul style="list-style-type: none"> <li>• Definition: VDD &lt; 50 nmol/L (20 ng/ml)</li> <li>• Measurement method: N/A</li> </ul>                                                                                                                                                                                                                                                                                                                                                                                                                                                                                                                                                                                                                                                                                                                                                                                                             |
| Other                       | <ul style="list-style-type: none"> <li>• Selection criteria: N/A</li> </ul>                                                                                                                                                                                                                                                                                                                                                                                                                                                                                                                                                                                                                                                                                                                                                                                                                                                                  |

|                             |                                                                                                                                                                                                                                                                                                                                                                                                                                                                                                                                                                                                                                                                                                                                                                                                                            |                                                                                                                                                                                                                                                                                                                                               |
|-----------------------------|----------------------------------------------------------------------------------------------------------------------------------------------------------------------------------------------------------------------------------------------------------------------------------------------------------------------------------------------------------------------------------------------------------------------------------------------------------------------------------------------------------------------------------------------------------------------------------------------------------------------------------------------------------------------------------------------------------------------------------------------------------------------------------------------------------------------------|-----------------------------------------------------------------------------------------------------------------------------------------------------------------------------------------------------------------------------------------------------------------------------------------------------------------------------------------------|
| Alizadeh et al. (2021)      |                                                                                                                                                                                                                                                                                                                                                                                                                                                                                                                                                                                                                                                                                                                                                                                                                            |                                                                                                                                                                                                                                                                                                                                               |
| Study characteristics       | <ul style="list-style-type: none"> <li>• Study type: case-control, single-center study</li> <li>• Study duration: October 2018–March 2019 (Autumn and winter)</li> <li>• Country: Iran</li> </ul>                                                                                                                                                                                                                                                                                                                                                                                                                                                                                                                                                                                                                          |                                                                                                                                                                                                                                                                                                                                               |
| Participant characteristics | <ul style="list-style-type: none"> <li>• No. of subjects: 83 CTE patients</li> <li>• Age: median 35 years</li> <li>• Gender: Female 83 (100 %)</li> <li>• Ethnicity: N/A</li> <li>• BMI: N/A</li> <li>• Comorbidity: N/A</li> <li>• Smoking: N/A</li> <li>• Alcohol: N/A</li> <li>• Skin type: Skin type III-IV</li> <li>• Diet: N/A</li> <li>• Sun-exposure/ sunscreen usage: N/A</li> <li>• Disease duration: N/A</li> <li>• Disease severity score/ grading: N/A</li> <li>• Alopecia pattern: N/A</li> <li>• FH of alopecia: N/A</li> <li>• Nail involvement: N/A</li> <li>• First/ recurrent episode: N/A</li> <li>• Stable/ active disease: N/A</li> <li>• Treatment information: N/A</li> <li>• Diagnosis and severity assessment: Dermatology Outpatient Clinic</li> </ul>                                          | <ul style="list-style-type: none"> <li>• No. of subjects: 83 healthy controls (age- and gender-matched)</li> <li>• Age: median 35 years</li> <li>• Gender: Female 83 (100 %)</li> <li>• Ethnicity: N/A</li> <li>• BMI: N/A</li> <li>• Skin type III-IV</li> <li>• Comorbidity: N/A</li> <li>• Smoking: N/A</li> <li>• Alcohol: N/A</li> </ul> |
| Vitamin D data              | <ul style="list-style-type: none"> <li>• VDD: 29 (34.9 %)</li> <li>• Level: <math>23.83 \pm 10.12</math> ng/ml</li> <li>• Correlation: Hair loss duration and vitamin D level: <math>r=-0.047</math>, <math>p=0.673</math></li> </ul>                                                                                                                                                                                                                                                                                                                                                                                                                                                                                                                                                                                      | <ul style="list-style-type: none"> <li>• VDD: 32 (38.6 %)</li> <li>• Level: <math>28.53 \pm 12.25</math> ng/ml</li> </ul>                                                                                                                                                                                                                     |
| Vitamin D measurement       | <ul style="list-style-type: none"> <li>• Definition: VDD: <math>&lt;20</math> ng/ml</li> <li>• Measurement method: chemiluminescence method with LIASON system (Diasorin Deutschland GmbH, Dietzenbach, Germany).</li> </ul>                                                                                                                                                                                                                                                                                                                                                                                                                                                                                                                                                                                               |                                                                                                                                                                                                                                                                                                                                               |
| Other                       | <ul style="list-style-type: none"> <li>• Exclusion criteria: farmers or villagers due to more sun exposure, very light-skin or dark-skin phototypes, pregnant and menopause women, unusual diets (such as vegetarian, ketogenic, etc.), and history of the following items during the last 6 months: febrile illnesses, severe physical or emotional stresses, surgery, supplement therapy, drugs incriminated in hair loss (e.g. chemotherapeutic agents, anticonvulsants, retinoids, anticoagulants, antidepressants, and antihypertensive medications), liver, kidney, thyroid, gastrointestinal, or any inflammatory disease associated with elevated erythrocyte-sedimentation rate or C-reactive protein.</li> <li>• Median and range of vitamin D levels were converted to mean and standard deviations.</li> </ul> |                                                                                                                                                                                                                                                                                                                                               |



| Conic et al. (2021)         |                                                                                                                                                                                                                                                                                                                                                                                                                                                                                                                                                                                                                                                                                                 |                                                                                                                                                                                                                                                                                                                                                                                                                                                                                                                                                                                                                                                                                                                                      |                                                                                                                                                                                                                                                                                                                                                                                                                                                                                                                                                                                                                                                                    |                                                                                                                                                                                                                                                                                                                                                                                                                                                                                                                                                                                                                                                                                                                                |                                                                                                                                                                                                                                                                                                                                                                                                                                                                                                                                                                                            |  |
|-----------------------------|-------------------------------------------------------------------------------------------------------------------------------------------------------------------------------------------------------------------------------------------------------------------------------------------------------------------------------------------------------------------------------------------------------------------------------------------------------------------------------------------------------------------------------------------------------------------------------------------------------------------------------------------------------------------------------------------------|--------------------------------------------------------------------------------------------------------------------------------------------------------------------------------------------------------------------------------------------------------------------------------------------------------------------------------------------------------------------------------------------------------------------------------------------------------------------------------------------------------------------------------------------------------------------------------------------------------------------------------------------------------------------------------------------------------------------------------------|--------------------------------------------------------------------------------------------------------------------------------------------------------------------------------------------------------------------------------------------------------------------------------------------------------------------------------------------------------------------------------------------------------------------------------------------------------------------------------------------------------------------------------------------------------------------------------------------------------------------------------------------------------------------|--------------------------------------------------------------------------------------------------------------------------------------------------------------------------------------------------------------------------------------------------------------------------------------------------------------------------------------------------------------------------------------------------------------------------------------------------------------------------------------------------------------------------------------------------------------------------------------------------------------------------------------------------------------------------------------------------------------------------------|--------------------------------------------------------------------------------------------------------------------------------------------------------------------------------------------------------------------------------------------------------------------------------------------------------------------------------------------------------------------------------------------------------------------------------------------------------------------------------------------------------------------------------------------------------------------------------------------|--|
| Study characteristics       | <ul style="list-style-type: none"><li>Study type: retrospective, descriptive cross-sectional, single-center study</li><li>Study duration: May 2009 to April 2010</li><li>Country: USA</li></ul>                                                                                                                                                                                                                                                                                                                                                                                                                                                                                                 |                                                                                                                                                                                                                                                                                                                                                                                                                                                                                                                                                                                                                                                                                                                                      |                                                                                                                                                                                                                                                                                                                                                                                                                                                                                                                                                                                                                                                                    |                                                                                                                                                                                                                                                                                                                                                                                                                                                                                                                                                                                                                                                                                                                                |                                                                                                                                                                                                                                                                                                                                                                                                                                                                                                                                                                                            |  |
| Participant characteristics | <ul style="list-style-type: none"><li>No. of subjects: 77 AA</li><li>Age: median 37.2 years</li><li>Gender: Male 23 (29.9 %), female 54 (70.1 %)</li><li>Ethnicity: White and middle eastern 54 (70 %), Black 13 (17 %), Hispanic 0, Asian and other 3 (3.9 %)</li><li>BMI: N/A</li><li>Comorbidity: N/A</li><li>Smoking: N/A</li><li>Alcohol: N/A</li><li>Skin type: N/A</li><li>Diet: N/A</li><li>Sun-exposure/ sunscreen usage: N/A</li><li>Disease duration: N/A</li><li>Disease severity score/ grading: N/A</li><li>Alopecia pattern: N/A</li><li>FH of alopecia: N/A</li><li>Nail involvement: N/A</li><li>First/ recurrent episode: N/A</li><li>First/ recurrent episode: N/A</li></ul> | <ul style="list-style-type: none"><li>No. of subjects: 73 AGA</li><li>Age: median 53.2 years</li><li>Gender: Male 8 (11 %), female 65 (89 %)</li><li>Ethnicity: White and middle eastern 65 (90 %), Black 4 (5.6 %), Hispanic 1 (1.4 %), Asian and other 1 (1.4 %)</li><li>BMI: N/A</li><li>Comorbidity: N/A</li><li>Smoking: N/A</li><li>Alcohol: N/A</li><li>Skin type: N/A</li><li>Diet: N/A</li><li>Sun-exposure/ sunscreen usage: N/A</li><li>Disease duration: N/A</li><li>Disease severity score/ grading: N/A</li><li>Alopecia pattern: N/A</li><li>FH of alopecia: N/A</li><li>Nail involvement: N/A</li><li>First/ recurrent episode: N/A</li><li>Stable/ active disease: N/A</li><li>Treatment information: N/A</li></ul> | <ul style="list-style-type: none"><li>No. of subjects: 121 TE</li><li>Age: median 46.9 years</li><li>Gender: Male 1 (0.83 %), female 120 (99.2 %)</li><li>Ethnicity: White and middle eastern 92 (77 %), Black 13 (11 %), Hispanic 3 (2.5 %), Asian and other 9 (7.5 %)</li><li>BMI: N/A</li><li>Comorbidity: N/A</li><li>Smoking: N/A</li><li>Alcohol: N/A</li><li>Skin type: N/A</li><li>Diet: N/A</li><li>Sun-exposure/ sunscreen usage: N/A</li><li>Disease duration: N/A</li><li>Disease severity score/ grading: N/A</li><li>Alopecia pattern: N/A</li><li>FH of alopecia: N/A</li><li>Nail involvement: N/A</li><li>First/ recurrent episode: N/A</li></ul> | <ul style="list-style-type: none"><li>No. of subjects: 58 LPP</li><li>Age: median 56.6 years</li><li>Gender: Male 3 (5.2 %), female 55 (94.8 %)</li><li>Ethnicity: White and middle eastern 47 (82 %), Black 6 (11 %), Hispanic 0, Asian and other 1 (1.8 %)</li><li>BMI: N/A</li><li>Comorbidity: N/A</li><li>Smoking: N/A</li><li>Alcohol: N/A</li><li>Skin type: N/A</li><li>Diet: N/A</li><li>Sun-exposure/ sunscreen usage: N/A</li><li>Disease duration: N/A</li><li>Disease severity score/ grading: N/A</li><li>Alopecia pattern: N/A</li><li>FH of alopecia: N/A</li><li>Nail involvement: N/A</li><li>First/ recurrent episode: N/A</li><li>Stable/ active disease: N/A</li><li>Treatment information: N/A</li></ul> | <ul style="list-style-type: none"><li>No. of subjects: 29 CCCA</li><li>Age: median 55.2 years</li><li>Gender: Male 0, female 29 (100 %)</li><li>Ethnicity: White and middle eastern 0, Black 27 (96 %), Hispanic 0, Asian and other 0</li><li>BMI: N/A</li><li>Comorbidity: N/A</li><li>Smoking: N/A</li><li>Alcohol: N/A</li><li>Skin type: N/A</li><li>Diet: N/A</li><li>Sun-exposure/ sunscreen usage: N/A</li><li>Disease duration: N/A</li><li>Disease severity score/ grading: N/A</li><li>Alopecia pattern: N/A</li><li>FH of alopecia: N/A</li><li>Nail involvement: N/A</li></ul> |  |

|                       |                                                                                                                                                                                                                                                                                                                                                                                               |                                                                                                                                                                                      |                                                                                                                                                                                      |                                                                                                                                                                                      |                                                                                                                                                                                                          |
|-----------------------|-----------------------------------------------------------------------------------------------------------------------------------------------------------------------------------------------------------------------------------------------------------------------------------------------------------------------------------------------------------------------------------------------|--------------------------------------------------------------------------------------------------------------------------------------------------------------------------------------|--------------------------------------------------------------------------------------------------------------------------------------------------------------------------------------|--------------------------------------------------------------------------------------------------------------------------------------------------------------------------------------|----------------------------------------------------------------------------------------------------------------------------------------------------------------------------------------------------------|
|                       | <ul style="list-style-type: none"> <li>Stable/ active disease: N/A</li> <li>Treatment information: N/A</li> <li>Diagnosis and severity assessment: N/A</li> </ul>                                                                                                                                                                                                                             | <ul style="list-style-type: none"> <li>Diagnosis and severity assessment: N/A</li> </ul>                                                                                             | <ul style="list-style-type: none"> <li>Stable/ active disease: N/A</li> <li>Treatment information: N/A</li> <li>Diagnosis and severity assessment: N/A</li> </ul>                    | <ul style="list-style-type: none"> <li>Diagnosis and severity assessment: N/A</li> </ul>                                                                                             | <ul style="list-style-type: none"> <li>First/ recurrent episode: N/A</li> <li>Stable/ active disease: N/A</li> <li>Treatment information: N/A</li> <li>Diagnosis and severity assessment: N/A</li> </ul> |
| Vitamin D data        | <ul style="list-style-type: none"> <li>VDD: 22 (28.6 %)</li> <li>VDI: 26 (33.8 %)</li> <li>Normal 29 (37.7 %)</li> <li>Level: median 27.7 ng/ml</li> <li>Correlation: N/A</li> </ul>                                                                                                                                                                                                          | <ul style="list-style-type: none"> <li>VDD: 18 (24.7 %)</li> <li>VDI: 23 (31.5 %)</li> <li>Normal 32 (43.8 %)</li> <li>Level: median 28.5 ng/ml</li> <li>Correlation: N/A</li> </ul> | <ul style="list-style-type: none"> <li>VDD: 38 (31.4 %)</li> <li>VDI: 41 (33.9 %)</li> <li>Normal 42 (34.7 %)</li> <li>Level: median 25.2 ng/ml</li> <li>Correlation: N/A</li> </ul> | <ul style="list-style-type: none"> <li>VDD: 20 (34.5 %)</li> <li>VDI: 21 (36.2 %)</li> <li>Normal 17 (29.3 %)</li> <li>Level: median 24.6 ng/ml</li> <li>Correlation: N/A</li> </ul> | <ul style="list-style-type: none"> <li>VDD: 16 (55.2 %)</li> <li>VDI: 7 (24.1 %)</li> <li>Normal 6 (20.7 %)</li> <li>Level: median 18.7 ng/ml</li> <li>Correlation: N/A</li> </ul>                       |
| Vitamin D measurement | <ul style="list-style-type: none"> <li>Definition: Cutoffs of <math>\leq 12</math> ng/mL, <math>&gt; 12</math>-20 ng/mL, <math>&gt; 21</math>-29 ng/mL, and <math>&gt; 30</math> ng/mL were used, and we grouped and re-defined as follow: VDD: <math>\leq 20</math> ng/mL, VDI: <math>&gt; 21</math>-29 ng/mL, normal <math>&gt; 30</math> ng/mL</li> <li>Measurement method: N/A</li> </ul> |                                                                                                                                                                                      |                                                                                                                                                                                      |                                                                                                                                                                                      |                                                                                                                                                                                                          |
| Other                 | <ul style="list-style-type: none"> <li>Exclusion criteria: patients taking vitamin D supplements at the time of their visit were excluded.</li> </ul>                                                                                                                                                                                                                                         |                                                                                                                                                                                      |                                                                                                                                                                                      |                                                                                                                                                                                      |                                                                                                                                                                                                          |

|                             |                                                                                                                                                                                                                                                                                                                                                                                                                                                                                                                                                                                                                                                                                                                                           |
|-----------------------------|-------------------------------------------------------------------------------------------------------------------------------------------------------------------------------------------------------------------------------------------------------------------------------------------------------------------------------------------------------------------------------------------------------------------------------------------------------------------------------------------------------------------------------------------------------------------------------------------------------------------------------------------------------------------------------------------------------------------------------------------|
| Danane et al. (2021)        |                                                                                                                                                                                                                                                                                                                                                                                                                                                                                                                                                                                                                                                                                                                                           |
| Study characteristics       | <ul style="list-style-type: none"> <li>• Study type: prospective, descriptive, single-center study</li> <li>• Study duration: December 2020 to June 2021</li> <li>• Country: India</li> </ul>                                                                                                                                                                                                                                                                                                                                                                                                                                                                                                                                             |
| Participant characteristics | <ul style="list-style-type: none"> <li>• No. of subjects: 50 AGA</li> <li>• Age: mean 24 years</li> <li>• Gender: Male 50 (100 %)</li> <li>• Ethnicity: N/A</li> <li>• BMI: N/A</li> <li>• Comorbidity: N/A</li> <li>• Smoking: N/A</li> <li>• Alcohol: N/A</li> <li>• Skin type: N/A</li> <li>• Diet: N/A</li> <li>• Sun-exposure/ sunscreen usage: N/A</li> <li>• Disease duration: N/A</li> <li>• Disease severity score/ grading: N/A</li> <li>• Alopecia pattern: N/A</li> <li>• FH of alopecia: N/A</li> <li>• Nail involvement: N/A</li> <li>• First/ recurrent episode: N/A</li> <li>• Stable/ active disease: N/A</li> <li>• Treatment information: N/A</li> <li>• Diagnosis and severity assessment: dermatology OPD</li> </ul> |
| Vitamin D data              | <ul style="list-style-type: none"> <li>• VDD: 41 (82%)</li> <li>• VDI: 7 (14%)</li> <li>• Level: N/A</li> <li>• Correlation: N/A</li> </ul>                                                                                                                                                                                                                                                                                                                                                                                                                                                                                                                                                                                               |
| Vitamin D measurement       | <ul style="list-style-type: none"> <li>• Definition: Normal levels of serum vitamin D is &gt;30 ng/ml. Vitamin D deficiency is defined as 25(OH)D of &lt;20 ng/ml. vitamin D insufficiency is recognized as 25(OH)D of 21-29 ng/ml.</li> <li>• Measurement method: N/A</li> </ul>                                                                                                                                                                                                                                                                                                                                                                                                                                                         |
| Other                       | <ul style="list-style-type: none"> <li>• Exclusion criteria: drug induced alopecia, chemotherapy induced alopecia, and alopecia due to other causes.</li> </ul>                                                                                                                                                                                                                                                                                                                                                                                                                                                                                                                                                                           |

|                             |                                                                                                                                                                                                                                                                                                                                                                                                                                                                                                                                                                                                                                                                                                 |                                                                                                                                                                                                                                                                                                                                                                       |
|-----------------------------|-------------------------------------------------------------------------------------------------------------------------------------------------------------------------------------------------------------------------------------------------------------------------------------------------------------------------------------------------------------------------------------------------------------------------------------------------------------------------------------------------------------------------------------------------------------------------------------------------------------------------------------------------------------------------------------------------|-----------------------------------------------------------------------------------------------------------------------------------------------------------------------------------------------------------------------------------------------------------------------------------------------------------------------------------------------------------------------|
| El-Tahlawy et al. (2021)    |                                                                                                                                                                                                                                                                                                                                                                                                                                                                                                                                                                                                                                                                                                 |                                                                                                                                                                                                                                                                                                                                                                       |
| Study characteristics       | <ul style="list-style-type: none"> <li>Study type: case-control, single-center study</li> <li>Study duration: N/A</li> <li>Country: Egypt</li> </ul>                                                                                                                                                                                                                                                                                                                                                                                                                                                                                                                                            |                                                                                                                                                                                                                                                                                                                                                                       |
| Participant characteristics | <ul style="list-style-type: none"> <li>No. of subjects: 30 MAGA</li> <li>Age: N/A</li> <li>Gender: Male 30 (100 %)</li> <li>Ethnicity: N/A</li> <li>BMI: N/A</li> <li>Comorbidity: N/A</li> <li>Smoking: N/A</li> <li>Alcohol: N/A</li> <li>Skin type: N/A</li> <li>Diet: N/A</li> <li>Sun-exposure/ sunscreen usage: N/A</li> <li>Disease duration: N/A</li> <li>Disease severity score/ grading: N/A</li> <li>Alopecia pattern: N/A</li> <li>FH of alopecia: N/A</li> <li>Nail involvement: N/A</li> <li>First/ recurrent episode: N/A</li> <li>Stable/ active disease: N/A</li> <li>Treatment information: N/A</li> <li>Diagnosis and severity assessment: dermatology department</li> </ul> | <ul style="list-style-type: none"> <li>No. of subjects: 30 healthy men (age- and gender-matched)</li> <li>Age: N/A</li> <li>Gender: Male 30 (100 %)</li> <li>Ethnicity: N/A</li> <li>BMI: N/A</li> <li>Comorbidity: N/A</li> <li>Smoking: N/A</li> <li>Alcohol: N/A</li> <li>Skin type: N/A</li> <li>Diet: N/A</li> <li>Sun-exposure/ sunscreen usage: N/A</li> </ul> |
| Vitamin D data              | <ul style="list-style-type: none"> <li>VDD: N/A</li> <li>Level: <math>37.1 \pm 11.9</math> ng/ml</li> <li>Correlation: no correlation between vitamin D level and degree of hair loss</li> </ul>                                                                                                                                                                                                                                                                                                                                                                                                                                                                                                | <ul style="list-style-type: none"> <li>VDD: N/A</li> <li>Level: <math>44.2 \pm 9.6</math> ng/ml</li> </ul>                                                                                                                                                                                                                                                            |
| Vitamin D measurement       | <ul style="list-style-type: none"> <li>Definition: N/A</li> <li>Measurement method: N/A</li> </ul>                                                                                                                                                                                                                                                                                                                                                                                                                                                                                                                                                                                              |                                                                                                                                                                                                                                                                                                                                                                       |
| Other                       | <ul style="list-style-type: none"> <li>Selection criteria: N/A</li> </ul>                                                                                                                                                                                                                                                                                                                                                                                                                                                                                                                                                                                                                       |                                                                                                                                                                                                                                                                                                                                                                       |

|                             |                                                                                                                                                                                                                                                                                                                                                                                                                                                                                                                                                                                                                                                                                                                                                                                                                                      |                                                                                                                                                                                                                                                                                                                                                                          |
|-----------------------------|--------------------------------------------------------------------------------------------------------------------------------------------------------------------------------------------------------------------------------------------------------------------------------------------------------------------------------------------------------------------------------------------------------------------------------------------------------------------------------------------------------------------------------------------------------------------------------------------------------------------------------------------------------------------------------------------------------------------------------------------------------------------------------------------------------------------------------------|--------------------------------------------------------------------------------------------------------------------------------------------------------------------------------------------------------------------------------------------------------------------------------------------------------------------------------------------------------------------------|
| Jasim et al. (2021)         |                                                                                                                                                                                                                                                                                                                                                                                                                                                                                                                                                                                                                                                                                                                                                                                                                                      |                                                                                                                                                                                                                                                                                                                                                                          |
| Study characteristics       | <ul style="list-style-type: none"> <li>• Study type: prospective, case-control, single-center study</li> <li>• Study duration: January 1, 2019 to December 31, 2019</li> <li>• Country: Iraq</li> </ul>                                                                                                                                                                                                                                                                                                                                                                                                                                                                                                                                                                                                                              |                                                                                                                                                                                                                                                                                                                                                                          |
| Participant characteristics | <ul style="list-style-type: none"> <li>• No. of subjects: 50 FPHL</li> <li>• Age: N/A</li> <li>• Gender: Female 50 (100 %)</li> <li>• Ethnicity: N/A</li> <li>• BMI: N/A</li> <li>• Comorbidity: N/A</li> <li>• Smoking: N/A</li> <li>• Alcohol: N/A</li> <li>• Skin type: N/A</li> <li>• Diet: N/A</li> <li>• Sun-exposure/ sunscreen usage: N/A</li> <li>• Disease duration: N/A</li> <li>• Disease severity score/ grading: Ludwig's classification grade I 19 (38.0%), grade II 22 (44.0%), grade III 9 (18.0%)</li> <li>• Alopecia pattern: N/A</li> <li>• FH of alopecia: N/A</li> <li>• Nail involvement: N/A</li> <li>• First/ recurrent episode: N/A</li> <li>• Stable/ active disease: N/A</li> <li>• Treatment information: N/A</li> <li>• <u>Diagnosis and severity assessment: Department of Dermatology</u></li> </ul> | <ul style="list-style-type: none"> <li>• No. of subjects: 50 healthy controls</li> <li>• Age: N/A</li> <li>• Gender: Female 50 (100 %)</li> <li>• Ethnicity: N/A</li> <li>• BMI: N/A</li> <li>• Comorbidity: N/A</li> <li>• Smoking: N/A</li> <li>• Alcohol: N/A</li> <li>• Skin type: N/A</li> <li>• Diet: N/A</li> <li>• Sun-exposure/ sunscreen usage: N/A</li> </ul> |
| Vitamin D data              | <ul style="list-style-type: none"> <li>• VDD: 34 (68%)</li> <li>• VDI: 30%</li> <li>• Normal 2%</li> <li>• Level: <math>22.8 \pm 11.5</math> ng/ml</li> <li>• Correlation: N/A</li> </ul>                                                                                                                                                                                                                                                                                                                                                                                                                                                                                                                                                                                                                                            | <ul style="list-style-type: none"> <li>• VDD: N/A</li> <li>• VDI: 11 (22%)</li> <li>• Level: <math>34.4 \pm 5.7</math> ng/ml</li> </ul>                                                                                                                                                                                                                                  |
| Vitamin D measurement       | <ul style="list-style-type: none"> <li>• VDD: &lt;20 ng/ml, VDI: 20-30 ng/ml</li> <li>• Measurement method: N/A</li> </ul>                                                                                                                                                                                                                                                                                                                                                                                                                                                                                                                                                                                                                                                                                                           |                                                                                                                                                                                                                                                                                                                                                                          |
| Other                       | <ul style="list-style-type: none"> <li>• Selection criteria: N/A</li> </ul>                                                                                                                                                                                                                                                                                                                                                                                                                                                                                                                                                                                                                                                                                                                                                          |                                                                                                                                                                                                                                                                                                                                                                          |

| Kerkemeyer et al. (2021)    |                                                                                                                                                                                                                                                                                                                                                                                                                                                                                                                                                                                                                                                                                                                                                                                                                                                                                                                                                                                                                                                                                                                                                                                                                                                                                                                                                   |
|-----------------------------|---------------------------------------------------------------------------------------------------------------------------------------------------------------------------------------------------------------------------------------------------------------------------------------------------------------------------------------------------------------------------------------------------------------------------------------------------------------------------------------------------------------------------------------------------------------------------------------------------------------------------------------------------------------------------------------------------------------------------------------------------------------------------------------------------------------------------------------------------------------------------------------------------------------------------------------------------------------------------------------------------------------------------------------------------------------------------------------------------------------------------------------------------------------------------------------------------------------------------------------------------------------------------------------------------------------------------------------------------|
| Study characteristics       | <ul style="list-style-type: none"> <li>• Study type: retrospective descriptive study</li> <li>• Study duration: November 2017 and March 2020</li> <li>• Country: Australia</li> </ul>                                                                                                                                                                                                                                                                                                                                                                                                                                                                                                                                                                                                                                                                                                                                                                                                                                                                                                                                                                                                                                                                                                                                                             |
| Participant characteristics | <ul style="list-style-type: none"> <li>• No. of subjects: 84 male AGA (31 with vitamin D results)</li> <li>• Age: mean 28.7 (range 14.0-49.0) years</li> <li>• Gender: Male 84 (100 %)</li> <li>• Ethnicity: European 43 (51.2 %), South and Central Asian (eg, Indian) 25 (29.8 %), Southeast Asian (eg, Vietnamese) 4 (4.8 %), Northeast Asian (eg, Chinese) 3 (3.6 %), North African and Middle Eastern 8 (9.5 %), Sub-Saharan African 1 (1.7 %)</li> <li>• BMI: N/A</li> <li>• Comorbidity: N/A</li> <li>• Smoking: N/A</li> <li>• Alcohol: N/A</li> <li>• Skin type: N/A</li> <li>• Diet: N/A</li> <li>• Sun-exposure/ sunscreen usage: N/A</li> <li>• Disease duration: N/A</li> <li>• Disease severity score/ grading: Baseline sinclair grade; 2.0 = 15 (17.6 %), 2.5 = 6 (7.1 %), 3.0 = 40 (47.6 %), 3.5 = 0 (0.0 %), 4.0 = 18 (21.4 %), 4.5 = 2 (2.4 %), 5.0 = 3 (3.6 %)</li> <li>• Alopecia pattern: N/A</li> <li>• FH of alopecia: FH of AGA 70 (83.3 %), AA 2 (2.4 %), none 10 (11.9%), not reported 4 (4.8%)</li> <li>• Nail involvement: N/A</li> <li>• First/ recurrent episode: N/A</li> <li>• Stable/ active disease: N/A</li> <li>• Treatment information: N/A</li> <li>• Diagnosis and severity assessment: 5-point Sinclair scale by 2 independent blinded dermatologists using standardized clinical photographs</li> </ul> |
| Vitamin D data              | <ul style="list-style-type: none"> <li>• VDD: 9 (29.0%)</li> <li>• Level: N/A</li> <li>• Correlation: N/A</li> </ul>                                                                                                                                                                                                                                                                                                                                                                                                                                                                                                                                                                                                                                                                                                                                                                                                                                                                                                                                                                                                                                                                                                                                                                                                                              |
| Vitamin D measurement       | <ul style="list-style-type: none"> <li>• VDD: &lt; 50 nmol/L (&lt; 20 ng/ml)</li> <li>• Measurement method: N/A</li> </ul>                                                                                                                                                                                                                                                                                                                                                                                                                                                                                                                                                                                                                                                                                                                                                                                                                                                                                                                                                                                                                                                                                                                                                                                                                        |
| Other                       | <ul style="list-style-type: none"> <li>• Exclusion criteria: N/A</li> </ul>                                                                                                                                                                                                                                                                                                                                                                                                                                                                                                                                                                                                                                                                                                                                                                                                                                                                                                                                                                                                                                                                                                                                                                                                                                                                       |

| Lizarondo et al. (2021)     |                                                                                                                                                                                                                                                                                                                                                                                                                                                                                                                                                                                                                                                                                                                                                                                                                                                                                                                                                                                                                                                                                                                                                                                                                                                                                                                                                                                                                     |                                                                                                                                                                                                                                                                                                                                                                                                                                                                                                                                                                                                                                                                                                                                                   |
|-----------------------------|---------------------------------------------------------------------------------------------------------------------------------------------------------------------------------------------------------------------------------------------------------------------------------------------------------------------------------------------------------------------------------------------------------------------------------------------------------------------------------------------------------------------------------------------------------------------------------------------------------------------------------------------------------------------------------------------------------------------------------------------------------------------------------------------------------------------------------------------------------------------------------------------------------------------------------------------------------------------------------------------------------------------------------------------------------------------------------------------------------------------------------------------------------------------------------------------------------------------------------------------------------------------------------------------------------------------------------------------------------------------------------------------------------------------|---------------------------------------------------------------------------------------------------------------------------------------------------------------------------------------------------------------------------------------------------------------------------------------------------------------------------------------------------------------------------------------------------------------------------------------------------------------------------------------------------------------------------------------------------------------------------------------------------------------------------------------------------------------------------------------------------------------------------------------------------|
| Study characteristics       | <ul style="list-style-type: none"> <li>• Study type: case-control, single-center study</li> <li>• Study duration: December 2017 to July 2018</li> <li>• Country: Philippines</li> </ul>                                                                                                                                                                                                                                                                                                                                                                                                                                                                                                                                                                                                                                                                                                                                                                                                                                                                                                                                                                                                                                                                                                                                                                                                                             |                                                                                                                                                                                                                                                                                                                                                                                                                                                                                                                                                                                                                                                                                                                                                   |
| Participant characteristics | <ul style="list-style-type: none"> <li>• No. of subjects: 29 AA patients</li> <li>• Age: <math>31.48 \pm 10.82</math> years</li> <li>• Gender: Male 10 (34.5%), female 19 (65.5%)</li> <li>• Ethnicity: N/A</li> <li>• BMI: <math>23.41 \text{ kg/m}^2</math></li> <li>• Comorbidity: N/A</li> <li>• Smoking: N/A</li> <li>• Alcohol: N/A</li> <li>• Skin type: skin phototype III = 5, IV = 24, V = 2</li> <li>• Diet: N/A</li> <li>• Sun-exposure/ sunscreen usage: photoprotection (umbrella, caps or hats, and long clothing) present = 21 absent = 8; average time of sun exposure per week; <math>&lt;30 \text{ min} = 16 (55.2 \%)</math>, <math>\geq 30 \text{ min} = 13 (44.8 \%)</math></li> <li>• Disease duration: Duration of current episode: <math>&lt;3 \text{ months} = 13</math>, 3-12 months = 11, 12-24 months = 3, 2-5 years = 1, <math>&gt;5 \text{ years} = 1</math></li> <li>• Disease severity score/ grading: SALT class; S1 = 20 (68.97%), S2 = 5 (17.24%), S3 = 2 (6.90%), S4 = 2 (6.90%), mean SALT score 25.24 (calculated)</li> <li>• Alopecia pattern: patchy 25, ophiasis 2, AT 1, AU 1</li> <li>• FH of alopecia: N/A</li> <li>• Nail involvement: N/A</li> <li>• First/ recurrent episode: N/A</li> <li>• Stable/ active disease: Active 28, inactive 1</li> <li>• Treatment information: N/A</li> <li>• Diagnosis and severity assessment: Department of Dermatology</li> </ul> | <ul style="list-style-type: none"> <li>• No. of subjects: 29 healthy controls (age-, sex-, and sun exposure-matched)</li> <li>• Age: <math>31.86 \pm 10.51</math> years</li> <li>• Gender: Male 10 (34.5%), female 19 (65.5%)</li> <li>• Ethnicity: N/A</li> <li>• BMI: <math>24.07 \text{ kg/m}^2</math></li> <li>• Comorbidity: N/A</li> <li>• Smoking: N/A</li> <li>• Alcohol: N/A</li> <li>• Skin type: Skin phototype III 3 IV 24 V 2</li> <li>• Diet: N/A</li> <li>• Sun-exposure/ sunscreen usage: Photoprotection (umbrella, caps or hats, and long clothing) present = 21, absent = 8; Average time of sun exposure per week; <math>&lt;30 \text{ min} = 16 (55.2 \%)</math>, <math>\geq 30 \text{ min} = 13 (44.8 \%)</math></li> </ul> |
| Vitamin D data              | <ul style="list-style-type: none"> <li>• VDD: 10 (34.48%)</li> <li>• VDI: 13 (44.83%)</li> <li>• Normal 6 (20.69%)</li> <li>• Level: <math>24.41 \pm 6.87 \text{ ng/ml}</math></li> <li>• Correlation: vitamin D level and SALT score, <math>r_s = -0.3277</math>, p-value = 0.09; vitamin D level and type of AA, <math>r_s = -0.0875</math>, p-value = 0.65; vitamin D level and disease duration, <math>r_s = -0.0511</math>, p-value = 0.79</li> </ul>                                                                                                                                                                                                                                                                                                                                                                                                                                                                                                                                                                                                                                                                                                                                                                                                                                                                                                                                                          | <ul style="list-style-type: none"> <li>• VDD: 5 (17.24%)</li> <li>• VDI: 17 (58.62%)</li> <li>• Normal 7 (24.14%)</li> <li>• Level: <math>24.68 \pm 6.68 \text{ ng/ml}</math></li> </ul>                                                                                                                                                                                                                                                                                                                                                                                                                                                                                                                                                          |
| Vitamin D measurement       | <ul style="list-style-type: none"> <li>• Definition: VDD <math>&lt; 20 \text{ ng/ml}</math>, VDI 21-29 <math>\text{ng/ml}</math>, and normal 30-100 <math>\text{ng/ml}</math></li> <li>• Measurement method: N/A</li> </ul>                                                                                                                                                                                                                                                                                                                                                                                                                                                                                                                                                                                                                                                                                                                                                                                                                                                                                                                                                                                                                                                                                                                                                                                         |                                                                                                                                                                                                                                                                                                                                                                                                                                                                                                                                                                                                                                                                                                                                                   |

|       |                                                                                                                                                                                                                                                                                                                                                                                                                                                                                                                                                                                                                                                                                                                                                                                                                                                                                                                                         |
|-------|-----------------------------------------------------------------------------------------------------------------------------------------------------------------------------------------------------------------------------------------------------------------------------------------------------------------------------------------------------------------------------------------------------------------------------------------------------------------------------------------------------------------------------------------------------------------------------------------------------------------------------------------------------------------------------------------------------------------------------------------------------------------------------------------------------------------------------------------------------------------------------------------------------------------------------------------|
| Other | <ul style="list-style-type: none"> <li>Exclusion criteria: (1) a history of treatment within 4 weeks of the following: corticosteroids (systemic, intralesional, and topical), vitamin D and calcium supplements, antiepileptics, antineoplastic drugs, antibiotics (clotrimazole and rifampicin), antihypertensives, antiretroviral drugs, and endocrine drugs; (2) having the following comorbidities: obesity (body mass index <math>\geq 30</math> kg/m<sup>2</sup>), dermatologic disorders associated with low vitamin D levels (vitiligo, psoriasis, atopic dermatitis, and chronic urticaria), atopy (bronchial asthma and allergic rhinitis), cancer, diabetes mellitus, thyroid disorders, and other autoimmune diseases (multiple sclerosis, systemic lupus erythematosus, rheumatoid arthritis, and scleroderma or systemic sclerosis); (3) pregnant, nursing women; (4) smokers; and (5) daily sunscreen users.</li> </ul> |
|-------|-----------------------------------------------------------------------------------------------------------------------------------------------------------------------------------------------------------------------------------------------------------------------------------------------------------------------------------------------------------------------------------------------------------------------------------------------------------------------------------------------------------------------------------------------------------------------------------------------------------------------------------------------------------------------------------------------------------------------------------------------------------------------------------------------------------------------------------------------------------------------------------------------------------------------------------------|



|                             |                                                                                                                                                                                                                                                                                                                                                                                                                                                                                                                                                                                                                                                                                                                                                                               |                                                                                                                                                                                                                                                                                                                                                                                                                                 |
|-----------------------------|-------------------------------------------------------------------------------------------------------------------------------------------------------------------------------------------------------------------------------------------------------------------------------------------------------------------------------------------------------------------------------------------------------------------------------------------------------------------------------------------------------------------------------------------------------------------------------------------------------------------------------------------------------------------------------------------------------------------------------------------------------------------------------|---------------------------------------------------------------------------------------------------------------------------------------------------------------------------------------------------------------------------------------------------------------------------------------------------------------------------------------------------------------------------------------------------------------------------------|
| Naser et al. (2021)         |                                                                                                                                                                                                                                                                                                                                                                                                                                                                                                                                                                                                                                                                                                                                                                               |                                                                                                                                                                                                                                                                                                                                                                                                                                 |
| Study characteristics       | <ul style="list-style-type: none"> <li>• Study type: prospective, case-control, single-center study</li> <li>• Study duration: March to November 2017</li> <li>• Country: Baghdad</li> </ul>                                                                                                                                                                                                                                                                                                                                                                                                                                                                                                                                                                                  |                                                                                                                                                                                                                                                                                                                                                                                                                                 |
| Participant characteristics | <ul style="list-style-type: none"> <li>• No. of subjects: 60 CTE</li> <li>• Age: <math>32.6 \pm 6.47</math> years</li> <li>• Gender: Female 60 (100 %)</li> <li>• Ethnicity: N/A</li> <li>• BMI: N/A</li> <li>• Comorbidity: N/A</li> <li>• Smoking: N/A</li> <li>• Alcohol: N/A</li> <li>• Skin type: N/A</li> <li>• Diet: N/A</li> <li>• Sun-exposure/ sunscreen usage: N/A</li> <li>• Disease duration: N/A</li> <li>• Disease severity score/ grading: N/A</li> <li>• Alopecia pattern: N/A</li> <li>• FH of alopecia: N/A</li> <li>• Nail involvement: N/A</li> <li>• First/ recurrent episode: N/A</li> <li>• Stable/ active disease: N/A</li> <li>• Treatment information: N/A</li> <li>• Diagnosis and severity assessment: dermatology outpatients clinic</li> </ul> | <ul style="list-style-type: none"> <li>• No. of subjects: 60 healthy controls (age- and gender-matched)</li> <li>• Age: <math>41.3 \pm 4.59</math> years</li> <li>• Gender: Female 60 (100 %)</li> <li>• Ethnicity: N/A</li> <li>• BMI: N/A</li> <li>• Comorbidity: N/A</li> <li>• Smoking: N/A</li> <li>• Alcohol: N/A</li> <li>• Skin type: N/A</li> <li>• Diet: N/A</li> <li>• Sun-exposure/ sunscreen usage: N/A</li> </ul> |
| Vitamin D data              | <ul style="list-style-type: none"> <li>• VDD: 8 (13.3)</li> <li>• VDI: 46 (76.6)</li> <li>• Normal 6 (10)</li> <li>• Level: <math>20.14 \pm 7.24</math> ng/ml</li> <li>• Correlation: N/A</li> </ul>                                                                                                                                                                                                                                                                                                                                                                                                                                                                                                                                                                          | <ul style="list-style-type: none"> <li>• VDD: 13 (21.6)</li> <li>• VDI: 22 (36.6)</li> <li>• Normal 25 (41.6)</li> <li>• Level: <math>36.13 \pm 22.46</math> ng/ml</li> </ul>                                                                                                                                                                                                                                                   |
| Vitamin D measurement       | <ul style="list-style-type: none"> <li>• Definition: VDD: &lt;20 ng/ml, VDI: 20-29 ng/ml, normal <math>\geq 30</math> ng/ml</li> <li>• Measurement method: competitive enzyme-linked Immunosorbent assay kit</li> </ul>                                                                                                                                                                                                                                                                                                                                                                                                                                                                                                                                                       |                                                                                                                                                                                                                                                                                                                                                                                                                                 |
| Other                       | <ul style="list-style-type: none"> <li>• Exclusion criteria: patients not have diagnostic criteria; there are systemic disease and or scalp disease that could be lead to hair loss; patients on medications that might be implicated to hair loss (e.g antithyroid, anticoagulants, anticonvulsants, retinoid, antihypertensive, or antidepressants); individual taking drug containing vitamin D, iron, dietary supplementations; newly stressful conditions during the last 6 months like physiological stress, high fever, surgical trauma, chronic systemic disease, bleeding pregnancy, delivery, emotional stress or patient has high CRP equal or more than 4.</li> </ul>                                                                                             |                                                                                                                                                                                                                                                                                                                                                                                                                                 |

|                             |                                                                                                                                                                                                                                                                                                                                                                                                                                                                                                                                                                                                                                                                                                                                                                                                                                          |                                                                                                                                                                                                                                                                                                                                                                                                                                                                                                                                             |
|-----------------------------|------------------------------------------------------------------------------------------------------------------------------------------------------------------------------------------------------------------------------------------------------------------------------------------------------------------------------------------------------------------------------------------------------------------------------------------------------------------------------------------------------------------------------------------------------------------------------------------------------------------------------------------------------------------------------------------------------------------------------------------------------------------------------------------------------------------------------------------|---------------------------------------------------------------------------------------------------------------------------------------------------------------------------------------------------------------------------------------------------------------------------------------------------------------------------------------------------------------------------------------------------------------------------------------------------------------------------------------------------------------------------------------------|
| Conic et al. (2020)         |                                                                                                                                                                                                                                                                                                                                                                                                                                                                                                                                                                                                                                                                                                                                                                                                                                          |                                                                                                                                                                                                                                                                                                                                                                                                                                                                                                                                             |
| Study characteristics       | <ul style="list-style-type: none"> <li>Study type: cross-sectional study, aggregated health record data (Explorys (Cleveland, OH, USA))</li> <li>Study duration: through April 1, 2019</li> <li>Country: USA</li> </ul>                                                                                                                                                                                                                                                                                                                                                                                                                                                                                                                                                                                                                  |                                                                                                                                                                                                                                                                                                                                                                                                                                                                                                                                             |
| Participant characteristics | <ul style="list-style-type: none"> <li>No. of subjects: 3510 pediatric AA</li> <li>Age: &lt; 10 years = 920 (26.2 %), 10-18 years = 2590 (73.8 %)</li> <li>Gender: Male 1570 (44.7%), female 1940 (55.3%)</li> <li>Ethnicity: Caucasian 1860 (53.0%), African American 650 (18.5%), Other 2160 (28.5%)</li> <li>BMI: N/A</li> <li>Comorbidity: N/A</li> <li>Smoking: N/A</li> <li>Alcohol: N/A</li> <li>Skin type: N/A</li> <li>Diet: N/A</li> <li>Sun-exposure/ sunscreen usage: N/A</li> <li>Disease duration: N/A</li> <li>Disease severity score/ grading: N/A</li> <li>Alopecia pattern: N/A</li> <li>FH of alopecia: N/A</li> <li>Nail involvement: N/A</li> <li>First/ recurrent episode: N/A</li> <li>Stable/ active disease: N/A</li> <li>Treatment information: N/A</li> <li>Diagnosis and severity assessment: N/A</li> </ul> | <ul style="list-style-type: none"> <li>No. of subjects: 8310710 pediatric patients without AA</li> <li>Age: &lt; 10 years = 3040100 (36.6 %), 10-18 years = 5270610 (63.4 %)</li> <li>Gender: Male 4291770 (51.6%), female 4018940 (48.4%)</li> <li>Ethnicity: Caucasian 4432400 (53.3%), African American 1027430 (12.4%), Other 2850880 (34.3%)</li> <li>BMI: N/A</li> <li>Comorbidity: N/A</li> <li>Smoking: N/A</li> <li>Alcohol: N/A</li> <li>Skin type: N/A</li> <li>Diet: N/A</li> <li>Sun-exposure/ sunscreen usage: N/A</li> </ul> |
| Vitamin D data              | <ul style="list-style-type: none"> <li>VDD: 5.1%</li> <li>Level: N/A</li> <li>Correlation: N/A</li> </ul>                                                                                                                                                                                                                                                                                                                                                                                                                                                                                                                                                                                                                                                                                                                                | <ul style="list-style-type: none"> <li>VDD: 0.4%</li> <li>Level: N/A</li> <li>Correlation: N/A</li> </ul>                                                                                                                                                                                                                                                                                                                                                                                                                                   |
| Vitamin D measurement       | <ul style="list-style-type: none"> <li>Definition: N/A</li> <li>Measurement method: N/A</li> </ul>                                                                                                                                                                                                                                                                                                                                                                                                                                                                                                                                                                                                                                                                                                                                       |                                                                                                                                                                                                                                                                                                                                                                                                                                                                                                                                             |
| Other                       | <ul style="list-style-type: none"> <li>Selection criteria: N/A</li> </ul>                                                                                                                                                                                                                                                                                                                                                                                                                                                                                                                                                                                                                                                                                                                                                                |                                                                                                                                                                                                                                                                                                                                                                                                                                                                                                                                             |

|                             |                                                                                                                                                                                                                                                                                                                                                                                                                                                                                                                                                                                                                                                                                                                                                                           |                                                                                                                                                                                                                                                                                                                                                                                           |
|-----------------------------|---------------------------------------------------------------------------------------------------------------------------------------------------------------------------------------------------------------------------------------------------------------------------------------------------------------------------------------------------------------------------------------------------------------------------------------------------------------------------------------------------------------------------------------------------------------------------------------------------------------------------------------------------------------------------------------------------------------------------------------------------------------------------|-------------------------------------------------------------------------------------------------------------------------------------------------------------------------------------------------------------------------------------------------------------------------------------------------------------------------------------------------------------------------------------------|
| Mohammad et al. (2020)      |                                                                                                                                                                                                                                                                                                                                                                                                                                                                                                                                                                                                                                                                                                                                                                           |                                                                                                                                                                                                                                                                                                                                                                                           |
| Study characteristics       | <ul style="list-style-type: none"> <li>• Study type: descriptive cross-sectional, single-center study</li> <li>• Study duration: 2015 and 2016</li> <li>• Country: Iran</li> </ul>                                                                                                                                                                                                                                                                                                                                                                                                                                                                                                                                                                                        |                                                                                                                                                                                                                                                                                                                                                                                           |
| Participant characteristics | <ul style="list-style-type: none"> <li>• No. of subjects: 50 TE (unspecified)</li> <li>• Age: N/A</li> <li>• Gender: 50 women (100 %)</li> <li>• Ethnicity: N/A</li> <li>• BMI: N/A</li> <li>• Comorbidity: N/A</li> <li>• Smoking: N/A</li> <li>• Alcohol: N/A</li> <li>• Skin type: N/A</li> <li>• Diet: N/A</li> <li>• Sun-exposure/ sunscreen usage: N/A</li> <li>• Disease duration: N/A</li> <li>• Disease severity score/ grading: N/A</li> <li>• Alopecia pattern: N/A</li> <li>• FH of alopecia: N/A</li> <li>• Nail involvement: N/A</li> <li>• First/ recurrent episode: N/A</li> <li>• Stable/ active disease: N/A</li> <li>• Treatment information: N/A</li> <li>• Diagnosis and severity assessment: Dermatology clinic of Rasool Akram Hospital</li> </ul> | <ul style="list-style-type: none"> <li>• No. of subjects: 50 controls (age- and gender-matched)</li> <li>• Age: N/A</li> <li>• Gender: 50 women (100 %)</li> <li>• Ethnicity: N/A</li> <li>• BMI: N/A</li> <li>• Comorbidity: N/A</li> <li>• Smoking: N/A</li> <li>• Alcohol: N/A</li> <li>• Skin type: N/A</li> <li>• Diet: N/A</li> <li>• Sun-exposure/ sunscreen usage: N/A</li> </ul> |
| Vitamin D data              | <ul style="list-style-type: none"> <li>• VDD: N/A</li> <li>• Level: <math>23.82 \pm 9.96</math> ng/ml</li> <li>• Correlation: N/A</li> </ul>                                                                                                                                                                                                                                                                                                                                                                                                                                                                                                                                                                                                                              | <ul style="list-style-type: none"> <li>• VDD: N/A</li> <li>• Level: <math>23.39 \pm 11.40</math> ng/ml</li> </ul>                                                                                                                                                                                                                                                                         |
| Vitamin D measurement       | <ul style="list-style-type: none"> <li>• Definition: N/A</li> <li>• Measurement method: N/A</li> </ul>                                                                                                                                                                                                                                                                                                                                                                                                                                                                                                                                                                                                                                                                    |                                                                                                                                                                                                                                                                                                                                                                                           |
| Other                       | <ul style="list-style-type: none"> <li>• Exclusion criteria: patients with other hair disorders or other causes of hair loss (such as tineacapitis, trichotillomania, secondary syphilis, androgenetic hair loss in women, scarring alopecia); patients with autoimmune disorders or systemic diseases (lupus, rheumatoid arthritis, scleroderma, thyroiditis, hyperthyroidism and hypothyroidism); taking supplements or receiving hair loss treatments during the last three months; current consumption of alcohol, diuretics or laxatives containing Mg.</li> </ul>                                                                                                                                                                                                   |                                                                                                                                                                                                                                                                                                                                                                                           |

|                             |                                                                                                                                                                                                                                                                                                                                                                                                                                                                                                                                                                                                                                                                                                                                                                                                                                                                                                                                                                                                                                                                                                                                                                   |                                                                                                                                                                                                                                                                                                                                                                                                                                                                                                                         |
|-----------------------------|-------------------------------------------------------------------------------------------------------------------------------------------------------------------------------------------------------------------------------------------------------------------------------------------------------------------------------------------------------------------------------------------------------------------------------------------------------------------------------------------------------------------------------------------------------------------------------------------------------------------------------------------------------------------------------------------------------------------------------------------------------------------------------------------------------------------------------------------------------------------------------------------------------------------------------------------------------------------------------------------------------------------------------------------------------------------------------------------------------------------------------------------------------------------|-------------------------------------------------------------------------------------------------------------------------------------------------------------------------------------------------------------------------------------------------------------------------------------------------------------------------------------------------------------------------------------------------------------------------------------------------------------------------------------------------------------------------|
| Sanke et al. (2020)         |                                                                                                                                                                                                                                                                                                                                                                                                                                                                                                                                                                                                                                                                                                                                                                                                                                                                                                                                                                                                                                                                                                                                                                   |                                                                                                                                                                                                                                                                                                                                                                                                                                                                                                                         |
| Study characteristics       | <ul style="list-style-type: none"> <li>• Study type: case-control, single-center study</li> <li>• Study duration: N/A</li> <li>• Country: India</li> </ul>                                                                                                                                                                                                                                                                                                                                                                                                                                                                                                                                                                                                                                                                                                                                                                                                                                                                                                                                                                                                        |                                                                                                                                                                                                                                                                                                                                                                                                                                                                                                                         |
| Participant characteristics | <ul style="list-style-type: none"> <li>• No. of subjects: 50 MAGA</li> <li>• Age: <math>21.17 \pm 3.66</math> years</li> <li>• Gender: Male 50 (100 %)</li> <li>• Ethnicity: N/A</li> <li>• BMI: <math>23.9 \pm 3.6</math> kg/m<sup>2</sup></li> <li>• Comorbidity: N/A</li> <li>• Smoking: N/A</li> <li>• Alcohol: N/A</li> <li>• Skin type: N/A</li> <li>• Diet: N/A</li> <li>• Sun-exposure/ sunscreen usage: average sun exposure <math>2.36 \pm 1.2</math> hours</li> <li>• Disease duration: <math>26.75 \pm 18.19</math> months</li> <li>• Disease severity score/ grading: Hamilton Norwood scale III 14 (25%), grade IV 19 (33%), grade V 20 (35%), and grade VI 4 (7%)</li> <li>• Alopecia pattern: Initial site of hair loss: frontal 9 (18%), temporal 37 (74%), vertex 4 (8%)</li> <li>• FH of alopecia: 24 (48%)</li> <li>• Nail involvement: N/A</li> <li>• First/ recurrent episode: N/A</li> <li>• Stable/ active disease: gradual (&gt;5 years) 16 (32%), moderate (1–5 years) 20 (40%), rapid (0–1 year) 14 (28%)</li> <li>• Treatment information: N/A</li> <li>• Diagnosis and severity assessment: dermatology outpatient clinic</li> </ul> | <ul style="list-style-type: none"> <li>• No. of subjects: 50 controls (age-, sex-, socioeconomic status, and outdoor exposure-matched)</li> <li>• Age: N/A</li> <li>• Gender: Male 50 (100 %)</li> <li>• Ethnicity: N/A</li> <li>• BMI: <math>22.4 \pm 2.4</math> kg/m<sup>2</sup></li> <li>• Comorbidity: N/A</li> <li>• Smoking: N/A</li> <li>• Alcohol: N/A</li> <li>• Skin type: N/A</li> <li>• Diet: N/A</li> <li>• Sun-exposure/ sunscreen usage: Average sun exposure <math>3.23 \pm 1.6</math> hours</li> </ul> |
| Vitamin D data              | <ul style="list-style-type: none"> <li>• VDD: 27 (54%)</li> <li>• VDI: 23 (46%)</li> <li>• Normal 0</li> <li>• Level: <math>20.10 \pm 4.8</math> ng/ml</li> <li>• Correlation: N/A</li> </ul>                                                                                                                                                                                                                                                                                                                                                                                                                                                                                                                                                                                                                                                                                                                                                                                                                                                                                                                                                                     | <ul style="list-style-type: none"> <li>• VDD: 4 (8%)</li> <li>• VDI: 14 (28 %)</li> <li>• Normal 32 (64%)</li> <li>• Level: <math>29.34 \pm 5.6</math> ng/ml</li> <li>• Correlation: N/A</li> </ul>                                                                                                                                                                                                                                                                                                                     |
| Vitamin D measurement       | <ul style="list-style-type: none"> <li>• Definition: vitamin D cutoffs of &lt; 10 ng/ml, 10-20 ng/ml, 20-30 ng/ml and &gt; 30 ng/ml were used in the study, and we grouped and redefined as follow: VDD &lt; 20 ng/ml, VDI 20-30 ng/ml, normal &gt; 30 ng/ml</li> <li>• Measurement method: radioimmunoassay technique</li> </ul>                                                                                                                                                                                                                                                                                                                                                                                                                                                                                                                                                                                                                                                                                                                                                                                                                                 |                                                                                                                                                                                                                                                                                                                                                                                                                                                                                                                         |
| Other                       | <ul style="list-style-type: none"> <li>• Selection criteria: N/A</li> </ul>                                                                                                                                                                                                                                                                                                                                                                                                                                                                                                                                                                                                                                                                                                                                                                                                                                                                                                                                                                                                                                                                                       |                                                                                                                                                                                                                                                                                                                                                                                                                                                                                                                         |

|  |                                                                                                                                                                                                                                                                                                                       |
|--|-----------------------------------------------------------------------------------------------------------------------------------------------------------------------------------------------------------------------------------------------------------------------------------------------------------------------|
|  | <ul style="list-style-type: none"><li>• Information regarding the prevalence of VDD and VDI were obtained from both the maintext and bar graphs. The graphical error of 5 cases with normal vitamin D level was recognized and ignored as no case with normal vitamin D level was reported in the maintext.</li></ul> |
|--|-----------------------------------------------------------------------------------------------------------------------------------------------------------------------------------------------------------------------------------------------------------------------------------------------------------------------|

|                             |                                                                                                                                                                                                                                                                                                                                                                                                                                                                                                                                                                                                                                                                                                                                                                                                                                                  |
|-----------------------------|--------------------------------------------------------------------------------------------------------------------------------------------------------------------------------------------------------------------------------------------------------------------------------------------------------------------------------------------------------------------------------------------------------------------------------------------------------------------------------------------------------------------------------------------------------------------------------------------------------------------------------------------------------------------------------------------------------------------------------------------------------------------------------------------------------------------------------------------------|
| Sokmen (2020)               |                                                                                                                                                                                                                                                                                                                                                                                                                                                                                                                                                                                                                                                                                                                                                                                                                                                  |
| Study characteristics       | <ul style="list-style-type: none"> <li>• Study type: retrospective, descriptive cross-sectional, single-center study</li> <li>• Study duration: January 2016 to December 2019</li> <li>• Country: Turkey</li> </ul>                                                                                                                                                                                                                                                                                                                                                                                                                                                                                                                                                                                                                              |
| Participant characteristics | <ul style="list-style-type: none"> <li>• No. of subjects: 151 TE</li> <li>• Age: median 29 (18 – 67) years</li> <li>• Gender: Female 151 (100 %)</li> <li>• Ethnicity: N/A</li> <li>• BMI: N/A</li> <li>• Comorbidity: DM 11.9%, HT 9.9%, hypothyroid 7.9%, bipolar disorder 7.9%, absence 62.4 %</li> <li>• Smoking: 23.2 %</li> <li>• Alcohol: N/A</li> <li>• Skin type: N/A</li> <li>• Diet: N/A</li> <li>• Sun-exposure/ sunscreen usage: N/A</li> <li>• Disease duration: N/A</li> <li>• Disease severity score/ grading: N/A</li> <li>• Alopecia pattern: N/A</li> <li>• FH of alopecia: N/A</li> <li>• Nail involvement: N/A</li> <li>• First/ recurrent episode: N/A</li> <li>• Stable/ active disease: N/A</li> <li>• Treatment information: N/A</li> <li>• Diagnosis and severity assessment: dermatology outpatient clinic</li> </ul> |
| Vitamin D data              | <ul style="list-style-type: none"> <li>• VDD: 143 (97.3 %)</li> <li>• Level: <math>11.7 \pm 7.22</math> ng/ml</li> <li>• Correlation: N/A</li> </ul>                                                                                                                                                                                                                                                                                                                                                                                                                                                                                                                                                                                                                                                                                             |
| Vitamin D measurement       | <ul style="list-style-type: none"> <li>• Definition: N/A</li> <li>• Measurement method: N/A</li> </ul>                                                                                                                                                                                                                                                                                                                                                                                                                                                                                                                                                                                                                                                                                                                                           |
| Other                       | <ul style="list-style-type: none"> <li>• Selection criteria: age <math>\geq 18</math> years, applying for hair loss, admitting dermatology outpatient clinic with TE ICD diagnosis code, and having at least one thyroid function test (TSH, free T4), serum vitamin D, vitamin B12 tests; exclusion criteria: the reason for hair loss other than TE is stated in the patient anamnesis, inadequate data about patients, having cancer, usage of chemotherapy.</li> </ul>                                                                                                                                                                                                                                                                                                                                                                       |

| Zhao et al. (2020)          |                                                                                                                                                                                                                                                                                                                                                                                                                                                                                                                                                                                                                                                                                                                      |                                                                                                                                                                                                                                                                                                                                                                                                                                                                                                                                                                                                                                                                          |                                                                                                                                                                                                                                                                                                                                                                                                                                                                                                                                                                                                                                                                       |                                                                                                                                                                                                                                                                                                                                                                                                                                                                                                        |
|-----------------------------|----------------------------------------------------------------------------------------------------------------------------------------------------------------------------------------------------------------------------------------------------------------------------------------------------------------------------------------------------------------------------------------------------------------------------------------------------------------------------------------------------------------------------------------------------------------------------------------------------------------------------------------------------------------------------------------------------------------------|--------------------------------------------------------------------------------------------------------------------------------------------------------------------------------------------------------------------------------------------------------------------------------------------------------------------------------------------------------------------------------------------------------------------------------------------------------------------------------------------------------------------------------------------------------------------------------------------------------------------------------------------------------------------------|-----------------------------------------------------------------------------------------------------------------------------------------------------------------------------------------------------------------------------------------------------------------------------------------------------------------------------------------------------------------------------------------------------------------------------------------------------------------------------------------------------------------------------------------------------------------------------------------------------------------------------------------------------------------------|--------------------------------------------------------------------------------------------------------------------------------------------------------------------------------------------------------------------------------------------------------------------------------------------------------------------------------------------------------------------------------------------------------------------------------------------------------------------------------------------------------|
| Study characteristics       | <ul style="list-style-type: none"> <li>Study type: case-control, single-center study</li> <li>Study duration: N/A</li> <li>Country: China</li> </ul>                                                                                                                                                                                                                                                                                                                                                                                                                                                                                                                                                                 |                                                                                                                                                                                                                                                                                                                                                                                                                                                                                                                                                                                                                                                                          |                                                                                                                                                                                                                                                                                                                                                                                                                                                                                                                                                                                                                                                                       |                                                                                                                                                                                                                                                                                                                                                                                                                                                                                                        |
| Participant characteristics | <ul style="list-style-type: none"> <li>No. of subjects: 443 AA patients</li> <li>Age: <math>41.26 \pm 14.10</math> years</li> <li>Gender: 164 male, 279 female</li> <li>Ethnicity: N/A</li> <li>BMI: N/A</li> <li>Comorbidity: N/A</li> <li>Smoking: N/A</li> <li>Alcohol: N/A</li> <li>Skin type: N/A</li> <li>Diet: N/A</li> <li>Sun-exposure/ sunscreen usage: N/A</li> <li>Disease duration: N/A</li> <li>Disease severity score/ grading: N/A</li> <li>Alopecia pattern: N/A</li> <li>FH of alopecia: N/A</li> <li>Nail involvement: N/A</li> <li>First/ recurrent episode: N/A</li> <li>Stable/ active disease: N/A</li> <li>Treatment information: N/A</li> <li>Diagnosis and severity assessment:</li> </ul> | <ul style="list-style-type: none"> <li>No. of subjects: 657 FPHL patients</li> <li>Age: <math>32.59 \pm 10.51</math> years</li> <li>Gender: Female 657 (100 %)</li> <li>Ethnicity: N/A</li> <li>BMI: N/A</li> <li>Comorbidity: N/A</li> <li>Smoking: N/A</li> <li>Alcohol: N/A</li> <li>Skin type: N/A</li> <li>Diet: N/A</li> <li>Sun-exposure/ sunscreen usage: N/A</li> <li>Disease duration: N/A</li> <li>Disease severity score/ grading: N/A</li> <li>Alopecia pattern: N/A</li> <li>FH of alopecia: N/A</li> <li>Nail involvement: N/A</li> <li>First/ recurrent episode: N/A</li> <li>Stable/ active disease: N/A</li> <li>Treatment information: N/A</li> </ul> | <ul style="list-style-type: none"> <li>No. of subjects: 777 MAGA patients</li> <li>Age: <math>29.89 \pm 7.02</math> years</li> <li>Gender: Male 777 (100 %)</li> <li>Ethnicity: N/A</li> <li>BMI: N/A</li> <li>Comorbidity: N/A</li> <li>Smoking: N/A</li> <li>Alcohol: N/A</li> <li>Skin type: N/A</li> <li>Diet: N/A</li> <li>Sun-exposure/ sunscreen usage: N/A</li> <li>Disease duration: N/A</li> <li>Disease severity score/ grading: N/A</li> <li>Alopecia pattern: N/A</li> <li>FH of alopecia: N/A</li> <li>Nail involvement: N/A</li> <li>First/ recurrent episode: N/A</li> <li>Stable/ active disease: N/A</li> <li>Treatment information: N/A</li> </ul> | <ul style="list-style-type: none"> <li>No. of subjects: 2070 normal controls; age <math>41.76 \pm 11.25</math> years</li> <li>1064 male; age <math>41.69 \pm 11.29</math> years</li> <li>1006 female; age <math>41.83 \pm 11.22</math> years</li> <li>Gender: male 1065, female 1006</li> <li>Ethnicity: N/A</li> <li>BMI: N/A</li> <li>Comorbidity: N/A</li> <li>Smoking: N/A</li> <li>Alcohol: N/A</li> <li>Skin type: N/A</li> <li>Diet: N/A</li> <li>Sun-exposure/ sunscreen usage: N/A</li> </ul> |

|                       |                                                                                                                                                                                                                                                                                                                                                                                                                                                                                                                                                                                                                                                                                                                            |                                                                                                                                                                                            |                                                                                                                                                                                         |                                                                                                                                                                                                                                                                                                                                                                       |
|-----------------------|----------------------------------------------------------------------------------------------------------------------------------------------------------------------------------------------------------------------------------------------------------------------------------------------------------------------------------------------------------------------------------------------------------------------------------------------------------------------------------------------------------------------------------------------------------------------------------------------------------------------------------------------------------------------------------------------------------------------------|--------------------------------------------------------------------------------------------------------------------------------------------------------------------------------------------|-----------------------------------------------------------------------------------------------------------------------------------------------------------------------------------------|-----------------------------------------------------------------------------------------------------------------------------------------------------------------------------------------------------------------------------------------------------------------------------------------------------------------------------------------------------------------------|
|                       | dermatologist from Huashan hospital                                                                                                                                                                                                                                                                                                                                                                                                                                                                                                                                                                                                                                                                                        | <ul style="list-style-type: none"> <li>• Diagnosis and severity assessment: dermatologist from Huashan hospital</li> </ul>                                                                 | <ul style="list-style-type: none"> <li>• Diagnosis and severity assessment: dermatologist from Huashan hospital</li> </ul>                                                              |                                                                                                                                                                                                                                                                                                                                                                       |
| Vitamin D data        | <ul style="list-style-type: none"> <li>• VDD: N/A</li> <li>• Level: 46.80 (45.20, 48.19) nmol/L → 18.72 (18.08 to 19.28) ng/ml → 18.69 ± 0.89 ng/ml</li> <li>• Correlation: N/A</li> </ul>                                                                                                                                                                                                                                                                                                                                                                                                                                                                                                                                 | <ul style="list-style-type: none"> <li>• VDD: N/A</li> <li>• Level: 47.90 (46.79, 49.20) nmol/L → 19.16 (18.72 to 19.68) ng/ml → 19.18 ± 0.71 ng/ml</li> <li>• Correlation: N/A</li> </ul> | <ul style="list-style-type: none"> <li>• VDD: N/A</li> <li>• Level: 50.00 (48.90, 51.40) nmol/L → 20 (19.56 to 20.56) ng/ml → 20.04 ± 0.74 ng/ml</li> <li>• Correlation: N/A</li> </ul> | <ul style="list-style-type: none"> <li>• All controls: 52.70 nmol/L (51.60, 53.70) → 21.08 (20.64 to 21.48) ng/ml → 21.07 ± 0.62 ng/ml</li> <li>• Female control: 52.35 nmol/L (50.70, 53.80) → 20.94 (20.28 to 21.52) ng/ml → 20.91 ± 0.92 ng/ml</li> <li>• Male control: 53.05 nmol/L (51.55, 54.60) → 21.22 (20.62 to 21.84) ng/ml → 21.23 ± 0.90 ng/ml</li> </ul> |
| Vitamin D measurement | <ul style="list-style-type: none"> <li>• Definition: N/A</li> <li>• Measurement method: Rayto RT- 6000 automatic enzyme-labeled instrument in the nuclear department of Huashan Hospital.</li> </ul>                                                                                                                                                                                                                                                                                                                                                                                                                                                                                                                       |                                                                                                                                                                                            |                                                                                                                                                                                         |                                                                                                                                                                                                                                                                                                                                                                       |
| Other                 | <ul style="list-style-type: none"> <li>• Selection criteria: 18-69 years old, no major cardiovascular, liver, kidney, or digestive disease, no treatment for alopecia one month before testing, no oral vitamin D supplementation one month before testing, patients with other skin disorders and/or another type of alopecia (scarring alopecia, traction alopecia, secondary syphilis, and telogen effluvium) were excluded from the study, and patients with osteoporosis or other metabolic bone diseases and autoimmune or systemic diseases (SLE, rheumatic arthritis, scleroderma, thyroiditis, hyperthyroidism, hypothyroidism) were also excluded.</li> <li>• Median IQR was converted to mean and SD</li> </ul> |                                                                                                                                                                                            |                                                                                                                                                                                         |                                                                                                                                                                                                                                                                                                                                                                       |



| Conic et al. (2019)         |                                                                                                                                                                                                                                                                                                                                                                                                                                     |                                                                                                                                                                                                                                                                                                                                                                                                                                                                           |                                                                                                                                                                                                                                                                                                                                                                                                                                                                    |                                                                                                                                                                                                                                                                                                                                                                                                                                                            |                                                                                                                                                                                                                                                                                                                                                                                                                                                  |                                                                                                                                                                                                                                                                                                                                                                                                                                                                    |
|-----------------------------|-------------------------------------------------------------------------------------------------------------------------------------------------------------------------------------------------------------------------------------------------------------------------------------------------------------------------------------------------------------------------------------------------------------------------------------|---------------------------------------------------------------------------------------------------------------------------------------------------------------------------------------------------------------------------------------------------------------------------------------------------------------------------------------------------------------------------------------------------------------------------------------------------------------------------|--------------------------------------------------------------------------------------------------------------------------------------------------------------------------------------------------------------------------------------------------------------------------------------------------------------------------------------------------------------------------------------------------------------------------------------------------------------------|------------------------------------------------------------------------------------------------------------------------------------------------------------------------------------------------------------------------------------------------------------------------------------------------------------------------------------------------------------------------------------------------------------------------------------------------------------|--------------------------------------------------------------------------------------------------------------------------------------------------------------------------------------------------------------------------------------------------------------------------------------------------------------------------------------------------------------------------------------------------------------------------------------------------|--------------------------------------------------------------------------------------------------------------------------------------------------------------------------------------------------------------------------------------------------------------------------------------------------------------------------------------------------------------------------------------------------------------------------------------------------------------------|
| Study characteristics       | <ul style="list-style-type: none"> <li>Study type: retrospective, cross-sectional descriptive, single-centre chart review</li> <li>Study duration: 2004 to 2016</li> <li>Country: USA</li> </ul>                                                                                                                                                                                                                                    |                                                                                                                                                                                                                                                                                                                                                                                                                                                                           |                                                                                                                                                                                                                                                                                                                                                                                                                                                                    |                                                                                                                                                                                                                                                                                                                                                                                                                                                            |                                                                                                                                                                                                                                                                                                                                                                                                                                                  |                                                                                                                                                                                                                                                                                                                                                                                                                                                                    |
| Participant characteristics | <ul style="list-style-type: none"> <li>No. of subjects: 18 AA</li> <li>Age: 71.83 ± 6.34 years</li> <li>Gender: Female 15 (83.3%), male 3 (16.7%)</li> <li>Ethnicity: White 4 (22.2%), African American 1 (5.6%), other/unknown 13 (72.2%)</li> <li>BMI: N/A</li> <li>Comorbidity: N/A</li> <li>Smoking: N/A</li> <li>Alcohol: N/A</li> <li>Skin type: N/A</li> <li>Diet: N/A</li> <li>Sun-exposure/sunscreen usage: N/A</li> </ul> | <ul style="list-style-type: none"> <li>No. of subjects: 27 FPHL</li> <li>Age: 70.26 ± 4.99 years</li> <li>Gender: Female 27 (100%), male 0</li> <li>Ethnicity: White 14 (51.6%), African American 5 (18.5%), other/Unknown 8 (29.6%)</li> <li>BMI: N/A</li> <li>Stable 11 (40.7%), worse 9 (33.3%)</li> <li>Comorbidity: N/A</li> <li>Smoking: N/A</li> <li>Alcohol: N/A</li> <li>Skin type: N/A</li> <li>Diet: N/A</li> <li>Sun-exposure/sunscreen usage: N/A</li> </ul> | <ul style="list-style-type: none"> <li>No. of subjects: 70 TE</li> <li>Age: 71.07 ± 5.35 years</li> <li>Gender: Female 68 (97.1%), male 2 (2.9%)</li> <li>Ethnicity: White 53 (75.7%), African American 5 (7.1%), other/Unknown 12 (17.1%)</li> <li>BMI: N/A</li> <li>Comorbidity: N/A</li> <li>Smoking: N/A</li> <li>Alcohol: N/A</li> <li>Skin type: N/A</li> <li>Diet: N/A</li> <li>Sun-exposure/sunscreen usage: N/A</li> <li>Disease duration: N/A</li> </ul> | <ul style="list-style-type: none"> <li>No. of subjects: 37 LPP</li> <li>Age: 69.24 ± 3.11 years</li> <li>Gender: Female 37 (100%), male 0</li> <li>Ethnicity: White 25 (67.6%), African American 3 (8.1%), other/unknown 9 (24.3%)</li> <li>BMI: N/A</li> <li>Comorbidity: N/A</li> <li>Smoking: N/A</li> <li>Alcohol: N/A</li> <li>Skin type: N/A</li> <li>Diet: N/A</li> <li>Sun-exposure/sunscreen usage: N/A</li> <li>Disease duration: N/A</li> </ul> | <ul style="list-style-type: none"> <li>No. of subjects: 7 FFA</li> <li>Age: 68.86 ± 3.24 years</li> <li>Gender: Female 7 (100%), male 0</li> <li>Ethnicity: White 6 (85.7%), African American 1 (14.3%), other/unknown 0</li> <li>BMI: N/A</li> <li>Comorbidity: N/A</li> <li>Smoking: N/A</li> <li>Alcohol: N/A</li> <li>Skin type: N/A</li> <li>Diet: N/A</li> <li>Sun-exposure/sunscreen usage: N/A</li> <li>Disease duration: N/A</li> </ul> | <ul style="list-style-type: none"> <li>No. of subjects: 4 CCCA</li> <li>Age: 67.25 ± 1.26 years</li> <li>Gender: Female 4 (100%), male 0</li> <li>Ethnicity: White 0, African American 4 (100%), other/unknown 0</li> <li>BMI: N/A</li> <li>Comorbidity: N/A</li> <li>Smoking: N/A</li> <li>Alcohol: N/A</li> <li>Skin type: N/A</li> <li>Diet: N/A</li> <li>Sun-exposure/sunscreen usage: N/A</li> <li>Disease duration: N/A</li> <li>Disease severity</li> </ul> |

|                |                                                                                                                                                                                                                                                                                                                                                                                                                             |                                                                                                                                                                                                                                                                                                                                                                                                 |                                                                                                                                                                                                                                                                                                                                                                                                |                                                                                                                                                                                                                                                                                                                                                                                                               |                                                                                                                                                                                                                                                                                                                                                                                                             |                                                                                                                                                                                                                                                                                                                                                                                        |
|----------------|-----------------------------------------------------------------------------------------------------------------------------------------------------------------------------------------------------------------------------------------------------------------------------------------------------------------------------------------------------------------------------------------------------------------------------|-------------------------------------------------------------------------------------------------------------------------------------------------------------------------------------------------------------------------------------------------------------------------------------------------------------------------------------------------------------------------------------------------|------------------------------------------------------------------------------------------------------------------------------------------------------------------------------------------------------------------------------------------------------------------------------------------------------------------------------------------------------------------------------------------------|---------------------------------------------------------------------------------------------------------------------------------------------------------------------------------------------------------------------------------------------------------------------------------------------------------------------------------------------------------------------------------------------------------------|-------------------------------------------------------------------------------------------------------------------------------------------------------------------------------------------------------------------------------------------------------------------------------------------------------------------------------------------------------------------------------------------------------------|----------------------------------------------------------------------------------------------------------------------------------------------------------------------------------------------------------------------------------------------------------------------------------------------------------------------------------------------------------------------------------------|
|                | <ul style="list-style-type: none"> <li>• Disease duration: N/A</li> <li>• Disease severity score/grading: N/A</li> <li>• Alopecia pattern: N/A</li> <li>• FH of alopecia: N/A</li> <li>• Nail involvement: N/A</li> <li>• First/recurrent episode: N/A</li> <li>• Stable/active disease: stable 9 (50%), worse 6 (33.3%)</li> <li>• Treatment information: N/A</li> <li>• Diagnosis and severity assessment: N/A</li> </ul> | <ul style="list-style-type: none"> <li>• Disease duration: N/A</li> <li>• Disease severity score/grading: N/A</li> <li>• Alopecia pattern: N/A</li> <li>• FH of alopecia: N/A</li> <li>• Nail involvement: N/A</li> <li>• First/recurrent episode: N/A</li> <li>• Stable/active disease: N/A</li> <li>• Treatment information: N/A</li> <li>• Diagnosis and severity assessment: N/A</li> </ul> | <ul style="list-style-type: none"> <li>• Disease severity score/grading: N/A</li> <li>• Alopecia pattern: N/A</li> <li>• FH of alopecia: N/A</li> <li>• Nail involvement: N/A</li> <li>• First/recurrent episode: N/A</li> <li>• Stable/active disease: stable 22 (31.4%), worse 39 (55.7%)</li> <li>• Treatment information: N/A</li> <li>• Diagnosis and severity assessment: N/A</li> </ul> | <ul style="list-style-type: none"> <li>• Disease severity score/grading: N/A</li> <li>• Alopecia pattern: N/A</li> <li>• FH of alopecia: N/A</li> <li>• Nail involvement: N/A</li> <li>• First/recurrent episode: N/A</li> <li>• Stable/active disease: stable 11 (29.7 %), worse 22 (59.5 %)</li> <li>• Treatment information: N/A</li> <li>• Diagnosis and severity assessment: biopsy-confirmed</li> </ul> | <ul style="list-style-type: none"> <li>• Disease severity score/grading: N/A</li> <li>• Alopecia pattern: N/A</li> <li>• FH of alopecia: N/A</li> <li>• Nail involvement: N/A</li> <li>• First/recurrent episode: N/A</li> <li>• Stable/active disease: stable 4 (57.1 %), worse 1 (14.3 %)</li> <li>• Treatment information: N/A</li> <li>• Diagnosis and severity assessment: biopsy-confirmed</li> </ul> | <ul style="list-style-type: none"> <li>• score/grading: N/A</li> <li>• Alopecia pattern: N/A</li> <li>• FH of alopecia: N/A</li> <li>• Nail involvement: N/A</li> <li>• First/recurrent episode: N/A</li> <li>• Stable/active disease: stable 1 (25 %), worse 2 (50 %)</li> <li>• Treatment information: N/A</li> <li>• Diagnosis and severity assessment: biopsy-confirmed</li> </ul> |
| Vitamin D data | <ul style="list-style-type: none"> <li>• VDD: 1 (5.6%)</li> <li>• Level: N/A</li> <li>• Correlation: N/A</li> </ul>                                                                                                                                                                                                                                                                                                         | <ul style="list-style-type: none"> <li>• VDD: 4 (14.8%)</li> <li>• Level: N/A</li> <li>• Correlation: N/A</li> </ul>                                                                                                                                                                                                                                                                            | <ul style="list-style-type: none"> <li>• VDD: 20 (28.6%)</li> <li>• Level: N/A</li> <li>• Correlation: N/A</li> </ul>                                                                                                                                                                                                                                                                          | <ul style="list-style-type: none"> <li>• VDD: 11 (29.7%)</li> <li>• Level: N/A</li> <li>• Correlation: N/A</li> </ul>                                                                                                                                                                                                                                                                                         | <ul style="list-style-type: none"> <li>• VDD: 1 (14.3%)</li> <li>• Level: N/A</li> <li>• Correlation: N/A</li> </ul>                                                                                                                                                                                                                                                                                        | <ul style="list-style-type: none"> <li>• VDD: 3 (75%)</li> <li>• Level: N/A</li> <li>• Correlation: N/A</li> </ul>                                                                                                                                                                                                                                                                     |

|                              |                                                                                                        |
|------------------------------|--------------------------------------------------------------------------------------------------------|
| Vitamin D<br>measuremen<br>t | <ul style="list-style-type: none"> <li>• Definition: N/A</li> <li>• Measurement method: N/A</li> </ul> |
| Other                        | <ul style="list-style-type: none"> <li>• No exclusion criteria provided</li> </ul>                     |

|                             |                                                                                                                                                                                                                                                                                                                                                                                                                                                                                                                                                                                                                                                                                                        |                                                                                                                                                                                                                                                                                                                                                                         |
|-----------------------------|--------------------------------------------------------------------------------------------------------------------------------------------------------------------------------------------------------------------------------------------------------------------------------------------------------------------------------------------------------------------------------------------------------------------------------------------------------------------------------------------------------------------------------------------------------------------------------------------------------------------------------------------------------------------------------------------------------|-------------------------------------------------------------------------------------------------------------------------------------------------------------------------------------------------------------------------------------------------------------------------------------------------------------------------------------------------------------------------|
| El-Ghareeb (2019)           |                                                                                                                                                                                                                                                                                                                                                                                                                                                                                                                                                                                                                                                                                                        |                                                                                                                                                                                                                                                                                                                                                                         |
| Study characteristics       | <ul style="list-style-type: none"> <li>• Study type: case-control, single-center study</li> <li>• Study duration: N/A</li> <li>• Country: Egypt</li> </ul>                                                                                                                                                                                                                                                                                                                                                                                                                                                                                                                                             |                                                                                                                                                                                                                                                                                                                                                                         |
| Participant characteristics | <ul style="list-style-type: none"> <li>• No. of subjects: 20 AA</li> <li>• Age: N/A</li> <li>• Gender: N/A</li> <li>• Ethnicity: N/A</li> <li>• BMI: N/A</li> <li>• Comorbidity: N/A</li> <li>• Smoking: N/A</li> <li>• Alcohol: N/A</li> <li>• Skin type: N/A</li> <li>• Diet: N/A</li> <li>• Sun-exposure/ sunscreen usage: N/A</li> <li>• Disease duration: N/A</li> <li>• Disease severity score/ grading: N/A</li> <li>• Alopecia pattern: N/A</li> <li>• FH of alopecia: N/A</li> <li>• Nail involvement: N/A</li> <li>• First/ recurrent episode: N/A</li> <li>• Stable/ active disease: N/A</li> <li>• Treatment information: N/A</li> <li>• Diagnosis and severity assessment: N/A</li> </ul> | <ul style="list-style-type: none"> <li>• No. of subjects: 20 healthy persons (age-matched)</li> <li>• Age: N/A</li> <li>• Gender: N/A</li> <li>• Ethnicity: N/A</li> <li>• BMI: N/A</li> <li>• Comorbidity: N/A</li> <li>• Smoking: N/A</li> <li>• Alcohol: N/A</li> <li>• Skin type: N/A</li> <li>• Diet: N/A</li> <li>• Sun-exposure/ sunscreen usage: N/A</li> </ul> |
| Vitamin D data              | <ul style="list-style-type: none"> <li>• VDD: 7 (35 %)</li> <li>• Level: <math>22.35 \pm 7.45</math> ng/ml</li> <li>• Correlation: a significant negative correlation of serum 25(OH)D levels in correlation to SALT scores in patients with AA in the case group</li> </ul>                                                                                                                                                                                                                                                                                                                                                                                                                           | <ul style="list-style-type: none"> <li>• VDD: N/A</li> <li>• Level: <math>34.78 \pm 11.59</math> ng/ml</li> </ul>                                                                                                                                                                                                                                                       |
| Vitamin D measurement       | <ul style="list-style-type: none"> <li>• Definition: VDD: &lt; 20 ng/ml, VDI: 20-30 ng/ml</li> <li>• Measurement method: electrochemiluminescence (Elecys; Roche Diagnostics, Indianapolis, USA).</li> </ul>                                                                                                                                                                                                                                                                                                                                                                                                                                                                                           |                                                                                                                                                                                                                                                                                                                                                                         |
| Other                       | <ul style="list-style-type: none"> <li>• Exclusion criteria: N/A</li> </ul>                                                                                                                                                                                                                                                                                                                                                                                                                                                                                                                                                                                                                            |                                                                                                                                                                                                                                                                                                                                                                         |

| Kondrakhina et al. (2019)   |                                                                                                                                                                                                                                                                                                                                                                                                                                                                                                                                                                                                                                                                                                                                                                                                                                                                                                                                                                                                |                                                                                                                                                                                                                                                                                                                                                                             |
|-----------------------------|------------------------------------------------------------------------------------------------------------------------------------------------------------------------------------------------------------------------------------------------------------------------------------------------------------------------------------------------------------------------------------------------------------------------------------------------------------------------------------------------------------------------------------------------------------------------------------------------------------------------------------------------------------------------------------------------------------------------------------------------------------------------------------------------------------------------------------------------------------------------------------------------------------------------------------------------------------------------------------------------|-----------------------------------------------------------------------------------------------------------------------------------------------------------------------------------------------------------------------------------------------------------------------------------------------------------------------------------------------------------------------------|
| Study characteristics       | <ul style="list-style-type: none"> <li>• Study type: case-control, single-center study</li> <li>• Study duration: January 2017 and December 2018</li> <li>• Country: Russia</li> </ul>                                                                                                                                                                                                                                                                                                                                                                                                                                                                                                                                                                                                                                                                                                                                                                                                         |                                                                                                                                                                                                                                                                                                                                                                             |
| Participant characteristics | <ul style="list-style-type: none"> <li>• No. of subjects: 50 MAGA</li> <li>• Age: <math>26.2 \pm 5.3</math> years</li> <li>• Gender: Male 50 (100 %)</li> <li>• Ethnicity: N/A</li> <li>• BMI: N/A</li> <li>• Comorbidity: N/A</li> <li>• Smoking: N/A</li> <li>• Alcohol: N/A</li> <li>• Skin type: N/A</li> <li>• Diet: N/A</li> <li>• Sun-exposure/ sunscreen usage: N/A</li> <li>• Disease duration: <math>3.2 \pm 1.1</math> years</li> <li>• Disease severity score/ grading: Early (Norwood Hamilton class I-II) 24 (48%) and severe (Norwood Hamilton class III 16 (32%), and IV 10 (20%))</li> <li>• Alopecia pattern: N/A</li> <li>• FH of alopecia: N/A</li> <li>• Nail involvement: N/A</li> <li>• First/ recurrent episode: N/A</li> <li>• Stable/ active disease: N/A</li> <li>• Treatment information: N/A</li> <li>• Diagnosis and severity assessment: State Scientific Center for Dermatovenereology and Cosmetology (GNTSDK) of the Ministry of Health of Russia</li> </ul> | <ul style="list-style-type: none"> <li>• No. of subjects: 25 Control (age- and origin-matched)</li> <li>• Age: N/A</li> <li>• Gender: N/A</li> <li>• Ethnicity: N/A</li> <li>• BMI: N/A</li> <li>• Comorbidity: N/A</li> <li>• Smoking: N/A</li> <li>• Alcohol: N/A</li> <li>• Skin type: N/A</li> <li>• Diet: N/A</li> <li>• Sun-exposure/ sunscreen usage: N/A</li> </ul> |
| Vitamin D data              | <ul style="list-style-type: none"> <li>• VDD: N/A</li> <li>• Level: Median 21 (19–32) ng/ml → <math>24 \pm 9.64</math> ng/ml</li> <li>• Correlation: N/A</li> </ul>                                                                                                                                                                                                                                                                                                                                                                                                                                                                                                                                                                                                                                                                                                                                                                                                                            | <ul style="list-style-type: none"> <li>• VDD: N/A</li> <li>• Level: Median 45 (35–59) ng/ml → <math>46.33 \pm 17.79</math> ng/ml</li> <li>• Correlation: N/A</li> </ul>                                                                                                                                                                                                     |
| Vitamin D measurement       | <ul style="list-style-type: none"> <li>• Definition: N/A</li> <li>• Measurement method: enzyme immunoassay and immunoluminescent analysis, as well as high-performance liquid chromatography with mass spectrometry, were used.</li> </ul>                                                                                                                                                                                                                                                                                                                                                                                                                                                                                                                                                                                                                                                                                                                                                     |                                                                                                                                                                                                                                                                                                                                                                             |
| Other                       | <ul style="list-style-type: none"> <li>• Exclusion criteria were other forms of alopecia, as well as cases of hair loss as a complication of another (main) disease. The criteria for inclusion in the control group were normal indicators of the trichogram of the scalp, the absence (at the time of the</li> </ul>                                                                                                                                                                                                                                                                                                                                                                                                                                                                                                                                                                                                                                                                         |                                                                                                                                                                                                                                                                                                                                                                             |

|  |                                                                                                                                                  |
|--|--------------------------------------------------------------------------------------------------------------------------------------------------|
|  | study) of other dermatological diseases, as well as the absence of a history of parents and close relatives with a clinical picture of alopecia. |
|--|--------------------------------------------------------------------------------------------------------------------------------------------------|

|                             |                                                                                                                                                                                                                                                                                                                                                                                                                                                                                                                                                                                                                                                                                                                                                                                                                                                                                                                                          |                                                                                                                                                                                                                                                                                                                                                                                                                                |
|-----------------------------|------------------------------------------------------------------------------------------------------------------------------------------------------------------------------------------------------------------------------------------------------------------------------------------------------------------------------------------------------------------------------------------------------------------------------------------------------------------------------------------------------------------------------------------------------------------------------------------------------------------------------------------------------------------------------------------------------------------------------------------------------------------------------------------------------------------------------------------------------------------------------------------------------------------------------------------|--------------------------------------------------------------------------------------------------------------------------------------------------------------------------------------------------------------------------------------------------------------------------------------------------------------------------------------------------------------------------------------------------------------------------------|
| Marahatta et al. (2019)     |                                                                                                                                                                                                                                                                                                                                                                                                                                                                                                                                                                                                                                                                                                                                                                                                                                                                                                                                          |                                                                                                                                                                                                                                                                                                                                                                                                                                |
| Study characteristics       | <ul style="list-style-type: none"> <li>Study type: case-control, single-center study</li> <li>Study duration: October 2015 to September 2016</li> <li>Country: Nepal</li> </ul>                                                                                                                                                                                                                                                                                                                                                                                                                                                                                                                                                                                                                                                                                                                                                          |                                                                                                                                                                                                                                                                                                                                                                                                                                |
| Participant characteristics | <ul style="list-style-type: none"> <li>No. of subjects: 30 AA patients</li> <li>Age: <math>28.37 \pm 10.07</math> years</li> <li>Gender: Male 16 (51.6%), female 14 (48.3%)</li> <li>Ethnicity: N/A</li> <li>BMI: N/A</li> <li>Comorbidity: N/A</li> <li>Smoking: N/A</li> <li>Alcohol: N/A</li> <li>Skin type: N/A</li> <li>Diet: N/A</li> <li>Sun-exposure/ sunscreen usage: N/A</li> <li>Disease duration: N/A</li> <li>Disease severity score/ grading: SALT score = <math>3.56 \pm 3.50</math></li> <li>Alopecia pattern: scalp 29 (96.7 %), face 8 (26.6 %)</li> <li>FH of alopecia: N/A</li> <li>Nail involvement: N/A</li> <li>First/ recurrent episode: first episode 19 (63.3 %), recurrent episodes 11 (36.7 %)</li> <li>Stable/ active disease: gradual 17 (56.7 %), rapid 13 (43.3 %)</li> <li>Treatment information: N/A</li> <li>Diagnosis and severity assessment: consultant dermatologist of the department</li> </ul> | <ul style="list-style-type: none"> <li>No. of subjects: 30 healthy individuals (age- and gender-matched)</li> <li>Age: <math>30.50 \pm 9.03</math> years</li> <li>Gender: Male 15 (48.4%), female 15 (51.7%)</li> <li>Ethnicity: N/A</li> <li>BMI: N/A</li> <li>Comorbidity: N/A</li> <li>Smoking: N/A</li> <li>Alcohol: N/A</li> <li>Skin type: N/A</li> <li>Diet: N/A</li> <li>Sun-exposure/ sunscreen usage: N/A</li> </ul> |
| Vitamin D data              | <ul style="list-style-type: none"> <li>VDD: 25 (83.3%)</li> <li>Level: <math>21.22 \pm 25.44</math> ng/ml</li> <li>Correlation: vitamin D level and SALT score, <math>r = -0.026</math>, <math>p\text{-value} = 0.89</math>; vitamin D level and AA grade, <math>r = -0.102</math>, <math>p\text{-value} = 0.59</math></li> </ul>                                                                                                                                                                                                                                                                                                                                                                                                                                                                                                                                                                                                        | <ul style="list-style-type: none"> <li>VDD: 16 (53.3%)</li> <li>Level: <math>30.90 \pm 11.13</math> ng/ml</li> </ul>                                                                                                                                                                                                                                                                                                           |
| Vitamin D measurement       | <ul style="list-style-type: none"> <li>VDD: <math>\leq 20</math> ng/ml</li> <li>Measurement method: competitive chemiluminescence methods</li> </ul>                                                                                                                                                                                                                                                                                                                                                                                                                                                                                                                                                                                                                                                                                                                                                                                     |                                                                                                                                                                                                                                                                                                                                                                                                                                |
| Other                       | <ul style="list-style-type: none"> <li>Exclusion criteria: subjects not willing to participate in the study, known case of chronic renal or liver disease, pregnant or lactating, any subject treated with a topical, intralesional or systemic agent in the past month which is likely to cause hair re-growth were excluded from the study.</li> </ul>                                                                                                                                                                                                                                                                                                                                                                                                                                                                                                                                                                                 |                                                                                                                                                                                                                                                                                                                                                                                                                                |

| Namdar and Arian (2019)     |                                                                                                                                                                                                                                                                                                                                                                                                                                                                                                                                                                                                                                                                                                                                                                                                                                                                                |                                                                                                                                                                                                                                                                                                                                                                                                                                                               |
|-----------------------------|--------------------------------------------------------------------------------------------------------------------------------------------------------------------------------------------------------------------------------------------------------------------------------------------------------------------------------------------------------------------------------------------------------------------------------------------------------------------------------------------------------------------------------------------------------------------------------------------------------------------------------------------------------------------------------------------------------------------------------------------------------------------------------------------------------------------------------------------------------------------------------|---------------------------------------------------------------------------------------------------------------------------------------------------------------------------------------------------------------------------------------------------------------------------------------------------------------------------------------------------------------------------------------------------------------------------------------------------------------|
| Study characteristics       | <ul style="list-style-type: none"> <li>• Study type: case-control, single-center study</li> <li>• Study duration: N/A</li> <li>• Country: Turkey</li> </ul>                                                                                                                                                                                                                                                                                                                                                                                                                                                                                                                                                                                                                                                                                                                    |                                                                                                                                                                                                                                                                                                                                                                                                                                                               |
| Participant characteristics | <ul style="list-style-type: none"> <li>• No. of subjects: 60 AA</li> <li>• Age: <math>31.4 \pm 10.03</math> years</li> <li>• Gender: Male 30 (50 %), female 30 (50 %)</li> <li>• Ethnicity: N/A</li> <li>• BMI: N/A</li> <li>• Comorbidity: N/A</li> <li>• Smoking: N/A</li> <li>• Alcohol: N/A</li> <li>• Skin type: N/A</li> <li>• Diet: N/A</li> <li>• Sun-exposure/ sunscreen usage: N/A</li> <li>• Disease duration: 11.63 months</li> <li>• Disease severity score/ grading: SALT class; S1 = 43 (71.7%), S2 = 17 (28.3 %), mean SALT score 19.44 (calculated)</li> <li>• Alopecia pattern: N/A</li> <li>• FH of alopecia: N/A</li> <li>• Nail involvement: N/A</li> <li>• First/ recurrent episode: N/A</li> <li>• Stable/ active disease: N/A</li> <li>• Treatment information: N/A</li> <li>• <u>Diagnosis and severity assessment: Dermatology clinic</u></li> </ul> | <ul style="list-style-type: none"> <li>• No. of subjects: 61 controls without chronic or dermatological diseases</li> <li>• Age: <math>36.61 \pm 10.08</math> years</li> <li>• Gender: Male 34 (55.7 %), female 27 (44.3 %)</li> <li>• Ethnicity: N/A</li> <li>• BMI: N/A</li> <li>• Comorbidity: N/A</li> <li>• Smoking: N/A</li> <li>• Alcohol: N/A</li> <li>• Skin type: N/A</li> <li>• Diet: N/A</li> <li>• Sun-exposure/ sunscreen usage: N/A</li> </ul> |
| Vitamin D data              | <ul style="list-style-type: none"> <li>• VDD: 52 (86.7%)</li> <li>• VDI: 8 (13.3%)</li> <li>• Normal 0</li> <li>• Level: <math>13.1 \pm 6.29</math> ng/ml</li> <li>• Correlation: N/A</li> </ul>                                                                                                                                                                                                                                                                                                                                                                                                                                                                                                                                                                                                                                                                               | <ul style="list-style-type: none"> <li>• VDD: 35 (57.4%)</li> <li>• VDI: 14 (23.0%)</li> <li>• Normal 12 (19.7%)</li> <li>• Level: <math>19.23 \pm 8.81</math> ng/ml</li> </ul>                                                                                                                                                                                                                                                                               |
| Vitamin D measurement       | <ul style="list-style-type: none"> <li>• Definition: VDD: &lt; 20 ng/mL, VDI: 20-29 ng/mL, normal &gt; 30 ng/mL</li> <li>• Measurement method: N/A</li> </ul>                                                                                                                                                                                                                                                                                                                                                                                                                                                                                                                                                                                                                                                                                                                  |                                                                                                                                                                                                                                                                                                                                                                                                                                                               |
| Other                       | <ul style="list-style-type: none"> <li>• Exclusion criteria: Those who took vitamin D or calcium supplements in the last 3 months, those with renal disease, those who were pregnant, breastfeeding and menopausal for women, and those who received phototherapy treatment in the last 6 months</li> <li>• Data were obtained from bar graphs</li> </ul>                                                                                                                                                                                                                                                                                                                                                                                                                                                                                                                      |                                                                                                                                                                                                                                                                                                                                                                                                                                                               |



| Rehman et al. (2019)        |                                                                                                                                                                                                                                                                                                                                                                                                                                                                                                                                                                                                                                                                                                                                                                                                                                                                                                                                                                                                                                                                                                                                                                                                                            |                                                                                                                                                                                                                                                                                                                                                                                                                                                                                  |
|-----------------------------|----------------------------------------------------------------------------------------------------------------------------------------------------------------------------------------------------------------------------------------------------------------------------------------------------------------------------------------------------------------------------------------------------------------------------------------------------------------------------------------------------------------------------------------------------------------------------------------------------------------------------------------------------------------------------------------------------------------------------------------------------------------------------------------------------------------------------------------------------------------------------------------------------------------------------------------------------------------------------------------------------------------------------------------------------------------------------------------------------------------------------------------------------------------------------------------------------------------------------|----------------------------------------------------------------------------------------------------------------------------------------------------------------------------------------------------------------------------------------------------------------------------------------------------------------------------------------------------------------------------------------------------------------------------------------------------------------------------------|
| Study characteristics       | <ul style="list-style-type: none"> <li>• Study type: case-control, single-center study</li> <li>• Study duration: November 2016 to October 2017</li> <li>• Country: India</li> </ul>                                                                                                                                                                                                                                                                                                                                                                                                                                                                                                                                                                                                                                                                                                                                                                                                                                                                                                                                                                                                                                       |                                                                                                                                                                                                                                                                                                                                                                                                                                                                                  |
| Participant characteristics | <ul style="list-style-type: none"> <li>• No. of subjects: 135 AA</li> <li>• Age: <math>26 \pm 12.89</math> years</li> <li>• Gender: Male 91 (67.41%), female 44 (32.59%)</li> <li>• Ethnicity: N/A</li> <li>• BMI: <math>20.43 \pm 2.48</math> kg/m<sup>2</sup></li> <li>• Comorbidity: N/A</li> <li>• Smoking: N/A</li> <li>• Alcohol: N/A</li> <li>• Skin type: N/A</li> <li>• Diet: N/A</li> <li>• Sun-exposure/ sunscreen usage: N/A</li> <li>• Disease duration: <math>1.32 \pm 2.44</math> years</li> <li>• Disease severity score/ grading: SALT class; S1 = 52 (38.52%), S2 = 35 (25.93%), S3 = 17 (12.59%), S4 = 11 (8.15%), S5 = 7 (5.19%), mean SALT score 38.09 (calculated)</li> <li>• Alopecia pattern: patchy 97 (71.85%), ophiasis 21 (15.56%), reticular 10 (7.41%), AT 4 (2.96%), AU 3 (2.22%), beard only 13 (9.62%), scalp 84 (62.22)</li> <li>• FH of alopecia: N/A</li> <li>• Nail involvement: N/A</li> <li>• First/ recurrent episode: relapsing 18 (13.33%), first episode 117 (86.67%)</li> <li>• Stable/ active disease: active 90 (66.67%), stable 45 (33.33)</li> <li>• Treatment information: N/A</li> <li>• Diagnosis and severity assessment: Dermatology Outpatient Department</li> </ul> | <ul style="list-style-type: none"> <li>• No. of subjects: 135 controls (age- and sex-matched)</li> <li>• Age: <math>26 \pm 13.20</math> years</li> <li>• Gender: Male 91 (67.41%), female 44 (32.59%)</li> <li>• Ethnicity: N/A</li> <li>• BMI: <math>20.72 \pm 2.34</math> kg/m<sup>2</sup></li> <li>• Comorbidity: N/A</li> <li>• Smoking: N/A</li> <li>• Alcohol: N/A</li> <li>• Skin type: N/A</li> <li>• Diet: N/A</li> <li>• Sun-exposure/ sunscreen usage: N/A</li> </ul> |
| Vitamin D data              | <ul style="list-style-type: none"> <li>• VDD: 51 (37.78%)</li> <li>• VDI: 47 (34.81%)</li> <li>• Normal 37 (27.41%)</li> <li>• Level: <math>22.87 \pm 10.03</math> ng/ml</li> <li>• Correlation: vitamin D levels and SALT score, <math>r = -0.474</math>, <math>p = 0.000</math>; vitamin D levels and AA extent, <math>r = -0.297</math>; Vitamin D levels and AA pattern, <math>r = -0.273</math></li> </ul>                                                                                                                                                                                                                                                                                                                                                                                                                                                                                                                                                                                                                                                                                                                                                                                                            | <ul style="list-style-type: none"> <li>• VDD: 32 (23.70%)</li> <li>• VDI: 46 (34.07%)</li> <li>• Normal 57 (42.2%)</li> <li>• Level: <math>27.34 \pm 10.54</math> ng/ml</li> </ul>                                                                                                                                                                                                                                                                                               |
| Vitamin D measurement       | <ul style="list-style-type: none"> <li>• Definitions: VDD: &lt;20 ng/ml, VDI: 20–29.99 ng/ml, normal <math>\geq 30</math> ng/ml</li> <li>• Measurement method: N/A</li> </ul>                                                                                                                                                                                                                                                                                                                                                                                                                                                                                                                                                                                                                                                                                                                                                                                                                                                                                                                                                                                                                                              |                                                                                                                                                                                                                                                                                                                                                                                                                                                                                  |

|       |                                                                                                                                                                                                                                                                                                                                                                                                                                                                                                                                                                                           |
|-------|-------------------------------------------------------------------------------------------------------------------------------------------------------------------------------------------------------------------------------------------------------------------------------------------------------------------------------------------------------------------------------------------------------------------------------------------------------------------------------------------------------------------------------------------------------------------------------------------|
| Other | <ul style="list-style-type: none"> <li>Exclusion criteria: vitamin D supplementation, concurrent or family history of autoimmune diseases, women wearing veil, frequent ingestion of alcohol, gastrointestinal problems, bone or renal disease, or sarcoidosis or any other metabolic systemic diseases treated with systemic steroids, barbiturates, bisphosphonates, sulfasalazine, and psoralen with ultraviolet A/ultraviolet B therapy in the past 3 months, pregnancy or lactation, and obesity defined by body mass index (BMI:) <math>\geq 25</math> kg/m<sup>2</sup>.</li> </ul> |
|-------|-------------------------------------------------------------------------------------------------------------------------------------------------------------------------------------------------------------------------------------------------------------------------------------------------------------------------------------------------------------------------------------------------------------------------------------------------------------------------------------------------------------------------------------------------------------------------------------------|

|                                   |                                                                                                                                                                                                                                                                                                                                                                                                                                                                                                                                                                                                                                                                                                                                                                                                                                                                                                                                                                                               |                                                                                                                                                                                                                                                                                                                                                                                                                         |
|-----------------------------------|-----------------------------------------------------------------------------------------------------------------------------------------------------------------------------------------------------------------------------------------------------------------------------------------------------------------------------------------------------------------------------------------------------------------------------------------------------------------------------------------------------------------------------------------------------------------------------------------------------------------------------------------------------------------------------------------------------------------------------------------------------------------------------------------------------------------------------------------------------------------------------------------------------------------------------------------------------------------------------------------------|-------------------------------------------------------------------------------------------------------------------------------------------------------------------------------------------------------------------------------------------------------------------------------------------------------------------------------------------------------------------------------------------------------------------------|
| Siddappa et al. (2019) – adult AA |                                                                                                                                                                                                                                                                                                                                                                                                                                                                                                                                                                                                                                                                                                                                                                                                                                                                                                                                                                                               |                                                                                                                                                                                                                                                                                                                                                                                                                         |
| Study characteristics             | <ul style="list-style-type: none"> <li>Study type: retrospective, case-control, single-center study</li> <li>Study duration: December 2014 to November 2015</li> <li>Country: India</li> </ul>                                                                                                                                                                                                                                                                                                                                                                                                                                                                                                                                                                                                                                                                                                                                                                                                |                                                                                                                                                                                                                                                                                                                                                                                                                         |
| Participant characteristics       | <ul style="list-style-type: none"> <li>No. of subjects: 100 AA</li> <li>Age: <math>24.52 \pm 10.06</math> years</li> <li>Gender: males 72 (72%), female 28 (28%)</li> <li>Ethnicity: N/A</li> <li>BMI: N/A</li> <li>Comorbidity: N/A</li> <li>Smoking: N/A</li> <li>Alcohol: N/A</li> <li>Skin type: N/A</li> <li>Diet: N/A</li> <li>Sun-exposure/ sunscreen usage: N/A</li> <li>Disease duration: N/A</li> <li>Disease severity score/ grading: SALT class; S1 = 75 (99 %), S3 = 1 (1 %), mean SALT score 13.14 (calculated)</li> <li>Alopecia pattern: scalp = 63, beard = 24, scalp + beard = 8, scalp + eyebrow = 4, scalp + beard + eyebrow = 1</li> <li>FH of alopecia: N/A</li> <li>Nail involvement: N/A</li> <li>First/ recurrent episode: new cases 66 (66 %), old cases 34 (34 %)</li> <li>Stable/ active disease: N/A</li> <li>Treatment information: N/A</li> <li>Diagnosis and severity assessment: outpatient department of dermatology, venereology, and leprology</li> </ul> | <ul style="list-style-type: none"> <li>No. of subjects: 100 healthy controls (age- and sex-matched)</li> <li>Age: <math>28.96 \pm 11.49</math> years</li> <li>Gender: Males 58 (58%), female 42 (42%)</li> <li>Ethnicity: N/A</li> <li>BMI: N/A</li> <li>Comorbidity: N/A</li> <li>Smoking: N/A</li> <li>Alcohol: N/A</li> <li>Skin type: N/A</li> <li>Diet: N/A</li> <li>Sun-exposure/ sunscreen usage: N/A</li> </ul> |
| Vitamin D data                    | <ul style="list-style-type: none"> <li>VDD: 64 (64%)</li> <li>VDI: 26 (26%)</li> <li>Normal 10 (10%)</li> <li>Level: <math>18.90 \pm 8.32</math> ng/ml</li> <li>Correlation: vitamin D levels and SALT scores, <math>r = -0.298</math>, <math>p &lt; 0.05</math></li> </ul>                                                                                                                                                                                                                                                                                                                                                                                                                                                                                                                                                                                                                                                                                                                   | <ul style="list-style-type: none"> <li>VDD: 38 (38%)</li> <li>VDI: 26 (26%)</li> <li>Normal 36 (36%)</li> <li>Level: <math>28.21 \pm 18.32</math> ng/ml</li> </ul>                                                                                                                                                                                                                                                      |
| Vitamin D measurement             | <ul style="list-style-type: none"> <li>Definition: VDD &lt; 20 ng/ml, VDI 20-29.9 ng/ml, normal &gt;30 ng/ml</li> <li>Measurement method: chemiluminescence immunoassay method</li> </ul>                                                                                                                                                                                                                                                                                                                                                                                                                                                                                                                                                                                                                                                                                                                                                                                                     |                                                                                                                                                                                                                                                                                                                                                                                                                         |
| Other                             | <ul style="list-style-type: none"> <li>Selection criteria: N/A</li> </ul>                                                                                                                                                                                                                                                                                                                                                                                                                                                                                                                                                                                                                                                                                                                                                                                                                                                                                                                     |                                                                                                                                                                                                                                                                                                                                                                                                                         |

| Siddappa et al. (2019) – pediatric AA |                                                                                                                                                                                                                                                                                                                                                                                                                                                                                                                                                                                                                                                                                                                                                                                                                                                                   |                                                                                                                                                                                                                                                                                                                                                                                                                                 |
|---------------------------------------|-------------------------------------------------------------------------------------------------------------------------------------------------------------------------------------------------------------------------------------------------------------------------------------------------------------------------------------------------------------------------------------------------------------------------------------------------------------------------------------------------------------------------------------------------------------------------------------------------------------------------------------------------------------------------------------------------------------------------------------------------------------------------------------------------------------------------------------------------------------------|---------------------------------------------------------------------------------------------------------------------------------------------------------------------------------------------------------------------------------------------------------------------------------------------------------------------------------------------------------------------------------------------------------------------------------|
| Study characteristics                 | <ul style="list-style-type: none"> <li>• Study type: case-control, single-center study</li> <li>• Study duration: February 2015 to July 2015 (Spring and summer)</li> <li>• Country: India</li> </ul>                                                                                                                                                                                                                                                                                                                                                                                                                                                                                                                                                                                                                                                             |                                                                                                                                                                                                                                                                                                                                                                                                                                 |
| Participant characteristics           | <ul style="list-style-type: none"> <li>• No. of subjects: 30 AA (pediatric)</li> <li>• Age: <math>11.13 \pm 4.17</math> years</li> <li>• Gender: female 12 (40%)</li> <li>• Ethnicity: N/A</li> <li>• BMI: N/A</li> <li>• Comorbidity: N/A</li> <li>• Smoking: N/A</li> <li>• Alcohol: N/A</li> <li>• Skin type: N/A</li> <li>• Diet: N/A</li> <li>• Sun-exposure/ sunscreen usage: N/A</li> <li>• Disease duration: N/A</li> <li>• Disease severity score/ grading: N/A</li> <li>• Alopecia pattern: Scalp = 25, scalp + eyebrow = 4, eyebrow = 1</li> <li>• FH of alopecia: N/A</li> <li>• Nail involvement: N/A</li> <li>• First/ recurrent episode: N/A</li> <li>• Stable/ active disease: N/A</li> <li>• Treatment information: N/A</li> <li>• Diagnosis and severity assessment: Outpatient Department of Dermatology, Venereology and Leprology</li> </ul> | <ul style="list-style-type: none"> <li>• No. of subjects: 30 healthy controls (age- and gender- matched)</li> <li>• Age: <math>11.46 \pm 4.41</math> years</li> <li>• Gender: female 12 (40%)</li> <li>• Ethnicity: N/A</li> <li>• BMI: N/A</li> <li>• Comorbidity: N/A</li> <li>• Smoking: N/A</li> <li>• Alcohol: N/A</li> <li>• Skin type: N/A</li> <li>• Diet: N/A</li> <li>• Sun-exposure/ sunscreen usage: N/A</li> </ul> |
| Vitamin D data                        | <ul style="list-style-type: none"> <li>• VDD: 22 (73.3%)</li> <li>• VDI: 6 (20%)</li> <li>• Normal 2 (6.7 %)</li> <li>• Level: <math>17.21 \pm 6.57</math> ng/ml</li> <li>• Correlation: vitamin D levels and SALT scores, <math>r = -0.379</math>, <math>p\text{-value} &lt; 0.05</math></li> </ul>                                                                                                                                                                                                                                                                                                                                                                                                                                                                                                                                                              | <ul style="list-style-type: none"> <li>• VDD: 14 (46.7%)</li> <li>• VDI: 8 (26.7 %)</li> <li>• Normal 8 (26.7 %)</li> <li>• Level: <math>25.03 \pm 13.84</math> ng/ml</li> </ul>                                                                                                                                                                                                                                                |
| Vitamin D measurement                 | <ul style="list-style-type: none"> <li>• Definition: VDD: <math>&lt;20</math> ng/ml, VDI: 20-29.99 ng/ml, normal <math>&gt;30</math> ng/ml</li> <li>• Measurement method: N/A</li> </ul>                                                                                                                                                                                                                                                                                                                                                                                                                                                                                                                                                                                                                                                                          |                                                                                                                                                                                                                                                                                                                                                                                                                                 |
| Other                                 | <ul style="list-style-type: none"> <li>• Exclusion criteria: patients with other causes for alopecia (such as tinea capitis, androgenetic alopecia, trichotillomania, scarring alopecia, and traction alopecia), dermatological conditions (such as psoriasis and vitiligo), autoimmune or systemic diseases (such as diabetes mellitus, anemia, hypo/hyperthyroidism, SLE, rheumatoid arthritis, and scleroderma), and on medications such as steroids, immunosuppressants, calcium, and Vitamin D in the past 4 weeks and on phototherapy for the past 1 month.</li> </ul>                                                                                                                                                                                                                                                                                      |                                                                                                                                                                                                                                                                                                                                                                                                                                 |

| Brankov et al. (2018)       |                                                                                                                                                                                                                                                                                                                                                                                                                                                                                                                                                                                                                                                                                                                                                                                                                                                                                                                                  |                                                                                                                                                                                                                                                                                                                                                                                                                                                                                                                               |
|-----------------------------|----------------------------------------------------------------------------------------------------------------------------------------------------------------------------------------------------------------------------------------------------------------------------------------------------------------------------------------------------------------------------------------------------------------------------------------------------------------------------------------------------------------------------------------------------------------------------------------------------------------------------------------------------------------------------------------------------------------------------------------------------------------------------------------------------------------------------------------------------------------------------------------------------------------------------------|-------------------------------------------------------------------------------------------------------------------------------------------------------------------------------------------------------------------------------------------------------------------------------------------------------------------------------------------------------------------------------------------------------------------------------------------------------------------------------------------------------------------------------|
| Study characteristics       | <ul style="list-style-type: none"> <li>• Study type: retrospective, case-control, single-center study</li> <li>• Study duration: 2000 to 2016</li> <li>• Country: USA</li> </ul>                                                                                                                                                                                                                                                                                                                                                                                                                                                                                                                                                                                                                                                                                                                                                 |                                                                                                                                                                                                                                                                                                                                                                                                                                                                                                                               |
| Participant characteristics | <ul style="list-style-type: none"> <li>• No. of subjects: 334 LPP</li> <li>• Age: <math>54.77 \pm 12.83</math> years</li> <li>• Gender: Female 311 (93.1%), male 23 (6.9%)</li> <li>• Ethnicity: White 221 (66.2%), African American 86 (25.7%), Other 27 (8.1%)</li> <li>• BMI: N/A</li> <li>• Comorbidity: N/A</li> <li>• Smoking: N/A</li> <li>• Alcohol: N/A</li> <li>• Skin type: N/A</li> <li>• Diet: N/A</li> <li>• Sun-exposure/ sunscreen usage: N/A</li> <li>• Disease duration: N/A</li> <li>• Disease severity score/ grading: N/A</li> <li>• Alopecia pattern: N/A</li> <li>• FH of alopecia: N/A</li> <li>• Nail involvement: N/A</li> <li>• First/ recurrent episode: N/A</li> <li>• Stable/ active disease: N/A</li> <li>• Treatment information: N/A</li> <li>• Diagnosis and severity assessment: Cleveland Clinic Department of Dermatology, scalp biopsy was used to confirm the diagnosis of LPP</li> </ul> | <ul style="list-style-type: none"> <li>• No. of subjects: 78 controls with seborrheic dermatitis (age- and race-matched)</li> <li>• Age: <math>52.19 \pm 15.37</math> years</li> <li>• Gender: Female 62 (79.5%), male 16 (20.5%)</li> <li>• Ethnicity: White 55 (70.5%), African American 17 (21.8%), Other 6 (7.7%)</li> <li>• BMI: N/A</li> <li>• Comorbidity: N/A</li> <li>• Smoking: N/A</li> <li>• Alcohol: N/A</li> <li>• Skin type: N/A</li> <li>• Diet: N/A</li> <li>• Sun-exposure/ sunscreen usage: N/A</li> </ul> |
| Vitamin D data              | <ul style="list-style-type: none"> <li>• VDD: 167 (50.00%)</li> <li>• Level: N/A</li> <li>• Correlation: N/A</li> </ul>                                                                                                                                                                                                                                                                                                                                                                                                                                                                                                                                                                                                                                                                                                                                                                                                          | <ul style="list-style-type: none"> <li>• VDD: 51 (65.40%)</li> <li>• Level: N/A</li> </ul>                                                                                                                                                                                                                                                                                                                                                                                                                                    |
| Vitamin D measurement       | <ul style="list-style-type: none"> <li>• Definition: N/A</li> <li>• Measurement method: N/A</li> </ul>                                                                                                                                                                                                                                                                                                                                                                                                                                                                                                                                                                                                                                                                                                                                                                                                                           |                                                                                                                                                                                                                                                                                                                                                                                                                                                                                                                               |
| Other                       | <ul style="list-style-type: none"> <li>• Exclusion criteria: N/A</li> </ul>                                                                                                                                                                                                                                                                                                                                                                                                                                                                                                                                                                                                                                                                                                                                                                                                                                                      |                                                                                                                                                                                                                                                                                                                                                                                                                                                                                                                               |

| Cifcia (2018)               |                                                                                                                                                                                                                                                                                                                                                                                                                                                                                                                                                                                                                                                                                                                                                                                 |                                                                                                                                                                                                                                                                                                                                                                                                                                                                       |
|-----------------------------|---------------------------------------------------------------------------------------------------------------------------------------------------------------------------------------------------------------------------------------------------------------------------------------------------------------------------------------------------------------------------------------------------------------------------------------------------------------------------------------------------------------------------------------------------------------------------------------------------------------------------------------------------------------------------------------------------------------------------------------------------------------------------------|-----------------------------------------------------------------------------------------------------------------------------------------------------------------------------------------------------------------------------------------------------------------------------------------------------------------------------------------------------------------------------------------------------------------------------------------------------------------------|
| Study characteristics       | <ul style="list-style-type: none"> <li>• Study type: retrospective, case-control, single-center study</li> <li>• Study duration: January 2015 to December 2018</li> <li>• Country: Turkey</li> </ul>                                                                                                                                                                                                                                                                                                                                                                                                                                                                                                                                                                            |                                                                                                                                                                                                                                                                                                                                                                                                                                                                       |
| Participant characteristics | <ul style="list-style-type: none"> <li>• No. of subjects: 155 TE</li> <li>• Age: <math>30.7 \pm 9.80</math> years</li> <li>• Gender: Female 149 (96.13%)</li> <li>• Ethnicity: N/A</li> <li>• BMI: N/A</li> <li>• Comorbidity: N/A</li> <li>• Smoking: N/A</li> <li>• Alcohol: N/A</li> <li>• Skin type: N/A</li> <li>• Diet: N/A</li> <li>• Sun-exposure/ sunscreen usage: N/A</li> <li>• Disease duration: N/A</li> <li>• Disease severity score/ grading: N/A</li> <li>• Alopecia pattern: N/A</li> <li>• FH of alopecia: N/A</li> <li>• Nail involvement: N/A</li> <li>• First/ recurrent episode: N/A</li> <li>• Stable/ active disease: N/A</li> <li>• Treatment information: N/A</li> <li>• Diagnosis and severity assessment: dermatology outpatient clinics</li> </ul> | <ul style="list-style-type: none"> <li>• No. of subjects: 168 controls who visited other clinics for health checkup (age- and sex-matched)</li> <li>• Age: <math>30.76 \pm 8.80</math> years</li> <li>• Gender: Female 155 (92.26%)</li> <li>• Ethnicity: N/A</li> <li>• BMI: N/A</li> <li>• Comorbidity: N/A</li> <li>• Smoking: N/A</li> <li>• Alcohol: N/A</li> <li>• Skin type: N/A</li> <li>• Diet: N/A</li> <li>• Sun-exposure/ sunscreen usage: N/A</li> </ul> |
| Vitamin D data              | <ul style="list-style-type: none"> <li>• VDD: 131 (84.52 %)</li> <li>• VDI: 17 (10.97 %)</li> <li>• Normal 5 (3.23 %)</li> <li>• Level: <math>13.42 \pm 6.28</math> ng/ml</li> <li>• Correlation: N/A</li> </ul>                                                                                                                                                                                                                                                                                                                                                                                                                                                                                                                                                                | <ul style="list-style-type: none"> <li>• VDD: 143 (85.12 %)</li> <li>• VDI: 18 (10.71 %)</li> <li>• Normal 7 (4.17 %)</li> <li>• Level: <math>14.62 \pm 6.56</math> ng/ml</li> </ul>                                                                                                                                                                                                                                                                                  |
| Vitamin D measurement       | <ul style="list-style-type: none"> <li>• Definition: VDD: <math>\leq 20</math> ng/ml, VDI: 21-29 ng/ml</li> <li>• Measurement method: Gamma Counter device by using 25OH-vit D3 radioimmunoassay (RIA) kits (Beckman Coulter, Brea, CA, USA)</li> </ul>                                                                                                                                                                                                                                                                                                                                                                                                                                                                                                                         |                                                                                                                                                                                                                                                                                                                                                                                                                                                                       |
| Other                       | <ul style="list-style-type: none"> <li>• Exclusion criteria: renal or hepatic diseases, thyroid diseases, rheumatological diseases, bone metabolic diseases, malabsorption, type 1 diabetes mellitus or malignancies, histology of drug use such as multivitamin, corticosteroid, and drug affecting metabolism.</li> </ul>                                                                                                                                                                                                                                                                                                                                                                                                                                                     |                                                                                                                                                                                                                                                                                                                                                                                                                                                                       |

| Daroach et al. (2018)       |                                                                                                                                                                                                                                                                                                                                                                                                                                                                                                                                                                                                                                                                                                                                                                                                                                                                                                                                                                                                                                                                                                                                                                                                                                    |                                                                                                                                                                                                                                                                                                                                                                                                         |
|-----------------------------|------------------------------------------------------------------------------------------------------------------------------------------------------------------------------------------------------------------------------------------------------------------------------------------------------------------------------------------------------------------------------------------------------------------------------------------------------------------------------------------------------------------------------------------------------------------------------------------------------------------------------------------------------------------------------------------------------------------------------------------------------------------------------------------------------------------------------------------------------------------------------------------------------------------------------------------------------------------------------------------------------------------------------------------------------------------------------------------------------------------------------------------------------------------------------------------------------------------------------------|---------------------------------------------------------------------------------------------------------------------------------------------------------------------------------------------------------------------------------------------------------------------------------------------------------------------------------------------------------------------------------------------------------|
| Study characteristics       | <ul style="list-style-type: none"> <li>• Study type: case-control, single-center study</li> <li>• Study duration: N/A</li> <li>• Country: India</li> </ul>                                                                                                                                                                                                                                                                                                                                                                                                                                                                                                                                                                                                                                                                                                                                                                                                                                                                                                                                                                                                                                                                         |                                                                                                                                                                                                                                                                                                                                                                                                         |
| Participant characteristics | <ul style="list-style-type: none"> <li>• No. of subjects: 30 AA patients</li> <li>• Age: <math>28.97 \pm 9.96</math> years</li> <li>• Gender: Female 19, male 11</li> <li>• Ethnicity: N/A</li> <li>• BMI: N/A</li> <li>• Comorbidity: N/A</li> <li>• Smoking: N/A</li> <li>• Alcohol: N/A</li> <li>• Skin type: N/A</li> <li>• Diet: N/A</li> <li>• Sun-exposure/ sunscreen usage: N/A</li> <li>• Disease duration: mean 48 weeks</li> <li>• Disease severity score/ grading: SALT score = <math>35.8 \pm 27.5</math> %, SALT class; S1-2 = 24 (80%), S3-4 = 3 (10%), S5 = 3 (10%)</li> <li>• Alopecia pattern: Patchy 22 (73.3%), other patterns AA (diffuse, alopecia totalis, ophiasis, alopecia universalis) 8 (26.7%), Involvement of other body sites 8 (26.7%)</li> <li>• FH of alopecia: N/A</li> <li>• Nail involvement: 13 (43%)</li> <li>• First/ recurrent episode: First episode of AA 12 (40%), more than one episode of AA 18 (60%)</li> <li>• Stable/ active disease: Progressive disease (appearance of new patches and increase in size of existing patches) 22 (73.3%)</li> <li>• Treatment information: N/A</li> <li>• Diagnosis and severity assessment: assessed by a blinded dermatopathologist</li> </ul> | <ul style="list-style-type: none"> <li>• No. of subjects: 30 healthy controls</li> <li>• Age: <math>31.17 \pm 9.43</math> years</li> <li>• Gender: Female 14, male 16</li> <li>• Ethnicity: N/A</li> <li>• BMI: N/A</li> <li>• Comorbidity: N/A</li> <li>• Smoking: N/A</li> <li>• Alcohol: N/A</li> <li>• Skin type: N/A</li> <li>• Diet: N/A</li> <li>• Sun-exposure/ sunscreen usage: N/A</li> </ul> |
| Vitamin D data              | <ul style="list-style-type: none"> <li>• VDD: 29 (96.7%)</li> <li>• Level: <math>7.65 \pm 4.50</math> ng/ml</li> <li>• Correlation: SALT scores and vitamin D levels, <math>r = -0.256</math>, <math>p</math>-value = 0.17; vitamin D levels and total duration of illness <math>r = -0.224</math>, <math>p = 0.03</math>; no correlation could be demonstrated between serum vitamin D levels and site, pattern of disease, and progressive or stable disease.</li> </ul>                                                                                                                                                                                                                                                                                                                                                                                                                                                                                                                                                                                                                                                                                                                                                         | <ul style="list-style-type: none"> <li>• VDD: 22 (73.3%)</li> <li>• Level: <math>15.8 \pm 11.47</math> ng/ml</li> </ul>                                                                                                                                                                                                                                                                                 |
| Vitamin D measurement       | <ul style="list-style-type: none"> <li>• Definition: VDD: <math>&lt;20</math> ng/ml</li> <li>• Measurement method: N/A</li> </ul>                                                                                                                                                                                                                                                                                                                                                                                                                                                                                                                                                                                                                                                                                                                                                                                                                                                                                                                                                                                                                                                                                                  |                                                                                                                                                                                                                                                                                                                                                                                                         |

|       |                                                                                                                                                                                                                                                                                                                                                                                                                                                               |
|-------|---------------------------------------------------------------------------------------------------------------------------------------------------------------------------------------------------------------------------------------------------------------------------------------------------------------------------------------------------------------------------------------------------------------------------------------------------------------|
| Other | <ul style="list-style-type: none"><li>• Exclusion criteria: associated skin diseases like atopic dermatitis, psoriasis, autoimmune diseases (lupus erythematosus, rheumatoid arthritis, scleroderma, and thyroid disorder), patients taking oral corticosteroids in previous 2 weeks, patients applying topical Vit.D analogs or patients who have received regular Vit.D supplementation in previous 6 months, and pregnant and lactating mothers.</li></ul> |
|-------|---------------------------------------------------------------------------------------------------------------------------------------------------------------------------------------------------------------------------------------------------------------------------------------------------------------------------------------------------------------------------------------------------------------------------------------------------------------|



|                             |                                                                                                                                                                                                                                                                                                                                                                                                                                                                                                                                                                                                                                                                                                                                                                                                                                                                                |                                                                                                                                                                                                                                                                                                                                                                                                                                                                           |
|-----------------------------|--------------------------------------------------------------------------------------------------------------------------------------------------------------------------------------------------------------------------------------------------------------------------------------------------------------------------------------------------------------------------------------------------------------------------------------------------------------------------------------------------------------------------------------------------------------------------------------------------------------------------------------------------------------------------------------------------------------------------------------------------------------------------------------------------------------------------------------------------------------------------------|---------------------------------------------------------------------------------------------------------------------------------------------------------------------------------------------------------------------------------------------------------------------------------------------------------------------------------------------------------------------------------------------------------------------------------------------------------------------------|
| Gade et al. (2018)          |                                                                                                                                                                                                                                                                                                                                                                                                                                                                                                                                                                                                                                                                                                                                                                                                                                                                                |                                                                                                                                                                                                                                                                                                                                                                                                                                                                           |
| Study characteristics       | <ul style="list-style-type: none"> <li>• Study type: case-control, single-center study</li> <li>• Study duration: N/A</li> <li>• Country: India</li> </ul>                                                                                                                                                                                                                                                                                                                                                                                                                                                                                                                                                                                                                                                                                                                     |                                                                                                                                                                                                                                                                                                                                                                                                                                                                           |
| Participant characteristics | <ul style="list-style-type: none"> <li>• No. of subjects: 45 AA</li> <li>• Age: <math>32.73 \pm 10.43</math> years</li> <li>• Gender: female 31 (68.89%)</li> <li>• Ethnicity: N/A</li> <li>• BMI: <math>21.55 \pm 5.22</math> kg/m<sup>2</sup></li> <li>• Comorbidity: N/A</li> <li>• Smoking: N/A</li> <li>• Alcohol: N/A</li> <li>• Skin type: N/A</li> <li>• Diet: N/A</li> <li>• Sun-exposure/ sunscreen usage: N/A</li> <li>• Disease duration: 12 (4.0-17.0) months</li> <li>• Disease severity score/ grading: median SALT score (%) 4.23 (3.12–6.33)</li> <li>• Alopecia pattern: N/A</li> <li>• FH of alopecia: N/A</li> <li>• Nail involvement: N/A</li> <li>• First/ recurrent episode: N/A</li> <li>• Stable/ active disease: N/A</li> <li>• Treatment information: N/A</li> <li>• <u>Diagnosis and severity assessment: JIPMER Dermatology Clinic</u></li> </ul> | <ul style="list-style-type: none"> <li>• No. of subjects: 45 healthy controls (age-and gender-matched)</li> <li>• Age: <math>33.98 \pm 8.48</math> years</li> <li>• Gender: female 31 (68.89%)</li> <li>• Ethnicity: N/A</li> <li>• BMI: <math>23.42 \pm 5.39</math> kg/m<sup>2</sup></li> <li>• Comorbidity: N/A</li> <li>• Smoking: N/A</li> <li>• Alcohol: N/A</li> <li>• Skin type: N/A</li> <li>• Diet: N/A</li> <li>• Sun-exposure/ sunscreen usage: N/A</li> </ul> |
| Vitamin D data              | <ul style="list-style-type: none"> <li>• VDD: N/A</li> <li>• Level: <math>17.86 \pm 5.83</math> ng/ml</li> <li>• Correlation: vitamin D and SALT score, <math>\rho</math> value = -0.714, p-value = 0.001; vitamin D and duration of symptoms, <math>\rho</math> value = -0.672, p-value = 0.001; vitamin D and hs-CRP, <math>\rho</math> value = -0.689, p value = 0.001</li> </ul>                                                                                                                                                                                                                                                                                                                                                                                                                                                                                           | <ul style="list-style-type: none"> <li>• VDD: N/A</li> <li>• Level: <math>30.65 \pm 6.21</math> ng/ml</li> </ul>                                                                                                                                                                                                                                                                                                                                                          |
| Vitamin D measurement       | <ul style="list-style-type: none"> <li>• Definition: N/A</li> <li>• Measurement method: ELISA kits, vitamin D level collected in winter</li> </ul>                                                                                                                                                                                                                                                                                                                                                                                                                                                                                                                                                                                                                                                                                                                             |                                                                                                                                                                                                                                                                                                                                                                                                                                                                           |
| Other                       | <ul style="list-style-type: none"> <li>• Exclusion criteria: on any topical or systemic medication for the last 1 month before recruitment, smoking, alcoholism, obesity, pregnancy, malignancies, hepatic and renal disease, cardiovascular disease, endocrine disorders (thyroid, parathyroid or diabetes mellitus), autoimmune, infectious and inflammatory diseases</li> </ul>                                                                                                                                                                                                                                                                                                                                                                                                                                                                                             |                                                                                                                                                                                                                                                                                                                                                                                                                                                                           |

| Karaguzel et al. (2018)     |                                                                                                                                                                                                                                                                                                                                                                                                                                                                                                                                                                                                                                                                                                                                                                                                                                                            |                                                                                                                                                                                                                                                                                                                                                                                                                                                                            |
|-----------------------------|------------------------------------------------------------------------------------------------------------------------------------------------------------------------------------------------------------------------------------------------------------------------------------------------------------------------------------------------------------------------------------------------------------------------------------------------------------------------------------------------------------------------------------------------------------------------------------------------------------------------------------------------------------------------------------------------------------------------------------------------------------------------------------------------------------------------------------------------------------|----------------------------------------------------------------------------------------------------------------------------------------------------------------------------------------------------------------------------------------------------------------------------------------------------------------------------------------------------------------------------------------------------------------------------------------------------------------------------|
| Study characteristics       | <ul style="list-style-type: none"> <li>• Study type: case-control, single-center study</li> <li>• Study duration: N/A</li> <li>• Country: Turkey</li> </ul>                                                                                                                                                                                                                                                                                                                                                                                                                                                                                                                                                                                                                                                                                                |                                                                                                                                                                                                                                                                                                                                                                                                                                                                            |
| Participant characteristics | <ul style="list-style-type: none"> <li>• No. of subjects: 30 AA</li> <li>• Age: <math>10.5 \pm 2.9</math> years</li> <li>• Gender: Female 20 (66%), male 10 (34%)</li> <li>• Ethnicity: N/A</li> <li>• BMI: <math>17.9 \pm 2.2</math> kg/m<sup>2</sup></li> <li>• Comorbidity: N/A</li> <li>• Smoking: N/A</li> <li>• Alcohol: N/A</li> <li>• Skin type: N/A</li> <li>• Diet: N/A</li> <li>• Sun-exposure/ sunscreen usage: N/A</li> <li>• Disease duration: N/A</li> <li>• Disease severity score/ grading: N/A</li> <li>• Alopecia pattern: N/A</li> <li>• FH of alopecia: N/A</li> <li>• Nail involvement: N/A</li> <li>• First/ recurrent episode: N/A</li> <li>• Stable/ active disease: N/A</li> <li>• Treatment information: N/A</li> <li>• Diagnosis and severity assessment: Pediatric endocrinology and dermatology outpatient clinic</li> </ul> | <ul style="list-style-type: none"> <li>• No. of subjects: 30 controls (age- and gender-matched)</li> <li>• Age: <math>10.5 \pm 2.8</math> years</li> <li>• Gender: Female 20 (66%), male 10 (34%)</li> <li>• Ethnicity: N/A</li> <li>• BMI: <math>17.4 \pm 2.1</math> kg/m<sup>2</sup></li> <li>• Comorbidity: N/A</li> <li>• Smoking: N/A</li> <li>• Alcohol: N/A</li> <li>• Skin type: N/A</li> <li>• Diet: N/A</li> <li>• Sun-exposure/ sunscreen usage: N/A</li> </ul> |
| Vitamin D data              | <ul style="list-style-type: none"> <li>• VDD: 15 (50%)</li> <li>• Level: <math>25.3 \pm 19.4</math> ng/ml</li> <li>• Correlation: N/A</li> </ul>                                                                                                                                                                                                                                                                                                                                                                                                                                                                                                                                                                                                                                                                                                           | <ul style="list-style-type: none"> <li>• VDD: 16 (53%)</li> <li>• Level: <math>21.3 \pm 12.5</math> ng/ml</li> <li>• Correlation: N/A</li> </ul>                                                                                                                                                                                                                                                                                                                           |
| Vitamin D measurement       | <ul style="list-style-type: none"> <li>• Definition: VDD: <math>&lt; 20</math> ng/ml</li> <li>• Measurement method: high-performance liquid chromatography (HPLC with reversed phase column, IC3401rp, Thermo Separator Products, Immuchrom GmBH, Germany).</li> </ul>                                                                                                                                                                                                                                                                                                                                                                                                                                                                                                                                                                                     |                                                                                                                                                                                                                                                                                                                                                                                                                                                                            |
| Other                       | <ul style="list-style-type: none"> <li>• Exclusion criteria: with any other autoimmune or chronic illness, if they were obese or had been using medication in previous six months that could alter outcome of the study</li> </ul>                                                                                                                                                                                                                                                                                                                                                                                                                                                                                                                                                                                                                         |                                                                                                                                                                                                                                                                                                                                                                                                                                                                            |

|                             |                                                                                                                                                                                                                                                                                                                                                                                                                                                                                                                                                                                                                                                                                                                                                                                                                                                                             |                                                                                                                                                                                                                                                                                                                                                                                                                                                                                                                |
|-----------------------------|-----------------------------------------------------------------------------------------------------------------------------------------------------------------------------------------------------------------------------------------------------------------------------------------------------------------------------------------------------------------------------------------------------------------------------------------------------------------------------------------------------------------------------------------------------------------------------------------------------------------------------------------------------------------------------------------------------------------------------------------------------------------------------------------------------------------------------------------------------------------------------|----------------------------------------------------------------------------------------------------------------------------------------------------------------------------------------------------------------------------------------------------------------------------------------------------------------------------------------------------------------------------------------------------------------------------------------------------------------------------------------------------------------|
| Saniee et al. (2018)        |                                                                                                                                                                                                                                                                                                                                                                                                                                                                                                                                                                                                                                                                                                                                                                                                                                                                             |                                                                                                                                                                                                                                                                                                                                                                                                                                                                                                                |
| Study characteristics       | <ul style="list-style-type: none"> <li>• Study type: case-control, single-center study</li> <li>• Study duration: 2017 (spring and summer)</li> <li>• Country: Iran</li> </ul>                                                                                                                                                                                                                                                                                                                                                                                                                                                                                                                                                                                                                                                                                              |                                                                                                                                                                                                                                                                                                                                                                                                                                                                                                                |
| Participant characteristics | <ul style="list-style-type: none"> <li>• No. of subjects: 77 AA</li> <li>• Age: <math>27.38 \pm 11.94</math> years</li> <li>• Gender: Male 40 (51.9%), female 37 (48.1%)</li> <li>• Ethnicity: N/A</li> <li>• BMI: N/A</li> <li>• Comorbidity: N/A</li> <li>• Smoking: N/A</li> <li>• Alcohol: N/A</li> <li>• Skin type: FPT III 62 (80.5%), IV 15 (19.5%)</li> <li>• Diet: N/A</li> <li>• Sun-exposure/ sunscreen usage: N/A</li> <li>• Disease duration: N/A</li> <li>• Disease severity score/ grading: mean involved area = <math>43.51 \pm 20.25</math></li> <li>• Alopecia pattern: N/A</li> <li>• FH of alopecia: N/A</li> <li>• Nail involvement: N/A</li> <li>• First/ recurrent episode: N/A</li> <li>• Stable/ active disease: N/A</li> <li>• Treatment information: N/A</li> <li>• Diagnosis and severity assessment: outpatient dermatology clinics</li> </ul> | <ul style="list-style-type: none"> <li>• No. of subjects: 112 normal controls who visited dermatology clinics (age- and sex-matched)</li> <li>• Age: <math>29.54 \pm 13.65</math> years</li> <li>• Gender: Male 58 (51.8%), female 54 (48.2%)</li> <li>• Ethnicity: N/A</li> <li>• BMI: N/A</li> <li>• Comorbidity: N/A</li> <li>• Smoking: N/A</li> <li>• Alcohol: N/A</li> <li>• Skin type: FPT III 99 (88.4%), IV 13 (11.6 %)</li> <li>• Diet: N/A</li> <li>• Sun-exposure/ sunscreen usage: N/A</li> </ul> |
| Vitamin D data              | <ul style="list-style-type: none"> <li>• VDD: 15 (19.5%)</li> <li>• VDI: 47 (61%)</li> <li>• Normal 15 (19.5%)</li> <li>• Level: <math>20.23 \pm 11.11</math> ng/ml</li> <li>• Correlation: vitamin D levels and disease severity (involved area), <math>r = 0.008</math>, p-value = 0.94; vitamin D levels and disease duration <math>r = 0.022</math>, p-value = 0.84</li> </ul>                                                                                                                                                                                                                                                                                                                                                                                                                                                                                          | <ul style="list-style-type: none"> <li>• VDD: 12 (10.7%)</li> <li>• VDI: 61 (54.5%)</li> <li>• Normal 39 (34.8%)</li> <li>• Level: <math>25.63 \pm 15.90</math> ng/ml</li> </ul>                                                                                                                                                                                                                                                                                                                               |
| Vitamin D measurement       | <ul style="list-style-type: none"> <li>• Definition: VDD: <math>&lt; 10</math> ng/ml, VDI: 10-30 ng/ml</li> <li>• Measurement method: commercially available radioimmunoassay (RIA) kit, samples collected during spring and summer</li> </ul>                                                                                                                                                                                                                                                                                                                                                                                                                                                                                                                                                                                                                              |                                                                                                                                                                                                                                                                                                                                                                                                                                                                                                                |
| Other                       | <ul style="list-style-type: none"> <li>• Exclusion criteria: other types of alopecia, and autoimmune dermatologic diseases in control group, the use of immunosuppressive medication, zinc or vitamin D supplements or steroids, magnesium-based laxatives, diuretics or alcohol, patients with congenital or acquired errors of calcium or phosphorus metabolism, obese subjects, pregnant or lactating women, subjects with skin phototypes V, and VI, smokers, and those with chronic systematic diseases</li> </ul>                                                                                                                                                                                                                                                                                                                                                     |                                                                                                                                                                                                                                                                                                                                                                                                                                                                                                                |

| Sarac and Koca (2018)       |                                                                                                                                                                                                                                                                                                                                                                                                                                                                                                                                                                                                                                                                                                                                                                   |                                                                                                                                                                                                                                                                                                                                                                                                                                                                                                                                                                                                                                                                                                                                                                  |                                                                                                                                                                                                                                                                                                                                                                                                        |
|-----------------------------|-------------------------------------------------------------------------------------------------------------------------------------------------------------------------------------------------------------------------------------------------------------------------------------------------------------------------------------------------------------------------------------------------------------------------------------------------------------------------------------------------------------------------------------------------------------------------------------------------------------------------------------------------------------------------------------------------------------------------------------------------------------------|------------------------------------------------------------------------------------------------------------------------------------------------------------------------------------------------------------------------------------------------------------------------------------------------------------------------------------------------------------------------------------------------------------------------------------------------------------------------------------------------------------------------------------------------------------------------------------------------------------------------------------------------------------------------------------------------------------------------------------------------------------------|--------------------------------------------------------------------------------------------------------------------------------------------------------------------------------------------------------------------------------------------------------------------------------------------------------------------------------------------------------------------------------------------------------|
| Study characteristics       | <ul style="list-style-type: none"> <li>• Study type: case-control, single-center study</li> <li>• Study duration: April 2015 to April 2016</li> <li>• Country: Turkey</li> </ul>                                                                                                                                                                                                                                                                                                                                                                                                                                                                                                                                                                                  |                                                                                                                                                                                                                                                                                                                                                                                                                                                                                                                                                                                                                                                                                                                                                                  |                                                                                                                                                                                                                                                                                                                                                                                                        |
| Participant characteristics | <ul style="list-style-type: none"> <li>• No. of subjects: 58 AGA</li> <li>• Age: <math>30.3 \pm 8.8</math> years</li> <li>• Gender: Female 28 (48.28%)</li> <li>• Ethnicity: N/A</li> <li>• BMI: N/A</li> <li>• Comorbidity: N/A</li> <li>• Smoking: N/A</li> <li>• Alcohol: N/A</li> <li>• Skin type: N/A</li> <li>• Diet: N/A</li> <li>• Sun-exposure/ sunscreen usage: N/A</li> <li>• Disease duration: N/A</li> <li>• Disease severity score/ grading: N/A</li> <li>• Alopecia pattern: N/A</li> <li>• FH of alopecia: N/A</li> <li>• Nail involvement: N/A</li> <li>• First/ recurrent episode: N/A</li> <li>• Stable/ active disease: N/A</li> <li>• Treatment information: N/A</li> <li>• Diagnosis and severity assessment: Dermatology clinic</li> </ul> | <ul style="list-style-type: none"> <li>• No. of subjects: 71 TE</li> <li>• Age: <math>26.6 \pm 8.4</math> years</li> <li>• Gender: Female 65 (91.55%)</li> <li>• Ethnicity: N/A</li> <li>• BMI: N/A</li> <li>• Comorbidity: N/A</li> <li>• Smoking: N/A</li> <li>• Alcohol: N/A</li> <li>• Skin type: N/A</li> <li>• Diet: N/A</li> <li>• Sun-exposure/ sunscreen usage: N/A</li> <li>• Disease duration: N/A</li> <li>• Disease severity score/ grading: N/A</li> <li>• Alopecia pattern: N/A</li> <li>• FH of alopecia: N/A</li> <li>• Nail involvement: N/A</li> <li>• First/ recurrent episode: N/A</li> <li>• Stable/ active disease: N/A</li> <li>• Treatment information: N/A</li> <li>• Diagnosis and severity assessment: Dermatology clinic</li> </ul> | <ul style="list-style-type: none"> <li>• No. of subjects: 58 healthy controls</li> <li>• Age: <math>28.5 \pm 10.1</math> years</li> <li>• Gender: Female 47 (81.03%)</li> <li>• Ethnicity: N/A</li> <li>• BMI: N/A</li> <li>• Comorbidity: N/A</li> <li>• Smoking: N/A</li> <li>• Alcohol: N/A</li> <li>• Skin type: N/A</li> <li>• Diet: N/A</li> <li>• Sun-exposure/ sunscreen usage: N/A</li> </ul> |
| Vitamin D data              | <ul style="list-style-type: none"> <li>• VDD: N/A</li> <li>• Level: <math>16.02 \pm 8.3</math> ng/ml</li> <li>• Correlation: N/A</li> </ul>                                                                                                                                                                                                                                                                                                                                                                                                                                                                                                                                                                                                                       | <ul style="list-style-type: none"> <li>• VDD: N/A</li> <li>• Level: <math>11.6 \pm 5.2</math> ng/ml</li> <li>• Correlation: N/A</li> </ul>                                                                                                                                                                                                                                                                                                                                                                                                                                                                                                                                                                                                                       | <ul style="list-style-type: none"> <li>• VDD: N/A</li> <li>• Level: <math>12.2 \pm 8.3</math> ng/ml</li> <li>• Correlation: N/A</li> </ul>                                                                                                                                                                                                                                                             |
| Vitamin D measurement       | <ul style="list-style-type: none"> <li>• Definition: N/A</li> <li>• Measurement method: N/A</li> </ul>                                                                                                                                                                                                                                                                                                                                                                                                                                                                                                                                                                                                                                                            |                                                                                                                                                                                                                                                                                                                                                                                                                                                                                                                                                                                                                                                                                                                                                                  |                                                                                                                                                                                                                                                                                                                                                                                                        |
| Other                       | <ul style="list-style-type: none"> <li>• Exclusion criteria: patients with abnormal complete blood count, thyroid function test, vitamin B 12, folic acid, ferritin and zinc levels</li> </ul>                                                                                                                                                                                                                                                                                                                                                                                                                                                                                                                                                                    |                                                                                                                                                                                                                                                                                                                                                                                                                                                                                                                                                                                                                                                                                                                                                                  |                                                                                                                                                                                                                                                                                                                                                                                                        |

| Unal and Gonulalan (2018)   |                                                                                                                                                                                                                                                                                                                                                                                                                                                                                                                                                                                                                                                                                                                                                                                                                                                                                                                                                                                                                                                                                                                                                  |                                                                                                                                                                                                                                                                                                                                                                                                                                |
|-----------------------------|--------------------------------------------------------------------------------------------------------------------------------------------------------------------------------------------------------------------------------------------------------------------------------------------------------------------------------------------------------------------------------------------------------------------------------------------------------------------------------------------------------------------------------------------------------------------------------------------------------------------------------------------------------------------------------------------------------------------------------------------------------------------------------------------------------------------------------------------------------------------------------------------------------------------------------------------------------------------------------------------------------------------------------------------------------------------------------------------------------------------------------------------------|--------------------------------------------------------------------------------------------------------------------------------------------------------------------------------------------------------------------------------------------------------------------------------------------------------------------------------------------------------------------------------------------------------------------------------|
| Study characteristics       | <ul style="list-style-type: none"> <li>• Study type: case-control, single-center study</li> <li>• Study duration: November 2015 to March 2016</li> <li>• Country: Turkey</li> </ul>                                                                                                                                                                                                                                                                                                                                                                                                                                                                                                                                                                                                                                                                                                                                                                                                                                                                                                                                                              |                                                                                                                                                                                                                                                                                                                                                                                                                                |
| Participant characteristics | <ul style="list-style-type: none"> <li>• No. of subjects: 20 pediatric AA</li> <li>• Age: <math>12.67 \pm 4.16</math> years (calculated)</li> <li>• Gender: female 6 (30%)</li> <li>• Ethnicity: N/A</li> <li>• BMI: N/A</li> <li>• Comorbidity: N/A</li> <li>• Smoking: N/A</li> <li>• Alcohol: N/A</li> <li>• Skin type: all participants were white-skinned and from same region, Konya, Turkey</li> <li>• Diet: N/A</li> <li>• Sun-exposure/ sunscreen usage: N/A</li> <li>• Disease duration: <math>8.85 \pm 4.63</math> months</li> <li>• Disease severity score/grading: SALT class; S1 = 6 (30%), S2 = 9 (45%), S3 = 5 (25%), S4 = 0, S5 = 0, mean SALT score 35.78 (calculated)</li> <li>• Alopecia pattern: 2 (10%) two patches; 4 (20%) four patches; 2 (10%) five patches; 5 (25%) six patches; 3 (15%) seven patches; 1 (5%) eight patches; 3 (15%) nine patches.</li> <li>• FH of alopecia: N/A</li> <li>• Nail involvement: N/A</li> <li>• First/ recurrent episode: N/A</li> <li>• Stable/ active disease: N/A</li> <li>• Treatment information: N/A</li> <li>• Diagnosis and severity assessment: dermatology clinic</li> </ul> | <ul style="list-style-type: none"> <li>• No. of subjects: 34 pediatric healthy controls</li> <li>• Age: <math>16.54 \pm 0.91</math> years (calculated)</li> <li>• Gender: female 19 (55.88%)</li> <li>• Ethnicity: N/A</li> <li>• BMI: N/A</li> <li>• Comorbidity: N/A</li> <li>• Smoking: N/A</li> <li>• Alcohol: N/A</li> <li>• Skin type: N/A</li> <li>• Diet: N/A</li> <li>• Sun-exposure/ sunscreen usage: N/A</li> </ul> |
| Vitamin D data              | <ul style="list-style-type: none"> <li>• VDD: N/A</li> <li>• Level: <math>15.47 \pm 7.66</math> ng/ml</li> <li>• Correlation: vitamin D level and SALT score: <math>r = -0.831</math>, <math>p = 0.000</math>; vitamin D level and number of patches: <math>r = -0.989</math>, <math>p = 0.000</math>; vitamin D level and disease duration: <math>r = -0.997</math>, <math>p = 0.000</math></li> </ul>                                                                                                                                                                                                                                                                                                                                                                                                                                                                                                                                                                                                                                                                                                                                          | <ul style="list-style-type: none"> <li>• VDD: N/A</li> <li>• Level: <math>11.09 \pm 10.53</math> ng/ml</li> </ul>                                                                                                                                                                                                                                                                                                              |
| Vitamin D measurement       | <ul style="list-style-type: none"> <li>• VDD: was defined as <math>\leq 20</math> ng/ml</li> <li>• Measurement method: N/A</li> </ul>                                                                                                                                                                                                                                                                                                                                                                                                                                                                                                                                                                                                                                                                                                                                                                                                                                                                                                                                                                                                            |                                                                                                                                                                                                                                                                                                                                                                                                                                |

|       |                                                                                                                                                                                                                                                                                                                                                                                                     |
|-------|-----------------------------------------------------------------------------------------------------------------------------------------------------------------------------------------------------------------------------------------------------------------------------------------------------------------------------------------------------------------------------------------------------|
| Other | <ul style="list-style-type: none"><li>• Exclusion criteria: Patients with any dermatological disease except AA or systemic disease, history of sunscreen uses and smokers, Patients with a history of any topical or systemic treatment (dermatologic or nondermatologic) within 4 weeks, and patients receiving phototherapy within 6 months and BMI: <math>&gt;25 \text{ kg/m}^2</math></li></ul> |
|-------|-----------------------------------------------------------------------------------------------------------------------------------------------------------------------------------------------------------------------------------------------------------------------------------------------------------------------------------------------------------------------------------------------------|

|                             |                                                                                                                                                                                                                                                                                                                                                                                                                                                                                                                                                                                                                                                                                                                                                                                                                                                                                                                 |                                                                                                                                                                                                                                                                                                                                                                                                                                                                              |
|-----------------------------|-----------------------------------------------------------------------------------------------------------------------------------------------------------------------------------------------------------------------------------------------------------------------------------------------------------------------------------------------------------------------------------------------------------------------------------------------------------------------------------------------------------------------------------------------------------------------------------------------------------------------------------------------------------------------------------------------------------------------------------------------------------------------------------------------------------------------------------------------------------------------------------------------------------------|------------------------------------------------------------------------------------------------------------------------------------------------------------------------------------------------------------------------------------------------------------------------------------------------------------------------------------------------------------------------------------------------------------------------------------------------------------------------------|
| Bhat et al. (2017)          |                                                                                                                                                                                                                                                                                                                                                                                                                                                                                                                                                                                                                                                                                                                                                                                                                                                                                                                 |                                                                                                                                                                                                                                                                                                                                                                                                                                                                              |
| Study characteristics       | <ul style="list-style-type: none"> <li>Study type: cross-sectional case-control, single-center study</li> <li>Study duration: May to October 2015</li> <li>Country: India</li> </ul>                                                                                                                                                                                                                                                                                                                                                                                                                                                                                                                                                                                                                                                                                                                            |                                                                                                                                                                                                                                                                                                                                                                                                                                                                              |
| Participant characteristics | <ul style="list-style-type: none"> <li>No. of subjects: 50 AA</li> <li>Age: <math>22.4 \pm 8.6</math> years</li> <li>Gender: N/A</li> <li>Ethnicity: N/A</li> <li>BMI: <math>20.96 \pm 1.91</math> kg/m<sup>2</sup></li> <li>Comorbidity: N/A</li> <li>Smoking: N/A</li> <li>Alcohol: N/A</li> <li>Skin type: N/A</li> <li>Diet: N/A</li> <li>Sun-exposure/ sunscreen usage: N/A</li> <li>Disease duration <math>4.8 \pm 4.58</math> months</li> <li>Disease severity score/grading: SALT class; S1 = 38, S2 = 12, mean SALT score 18.38 (calculated)</li> <li>Alopecia pattern: single patch 29 (58%), multiple patch 21 (42%)</li> <li>FH of alopecia: N/A</li> <li>Nail involvement: N/A</li> <li>First/ recurrent episode: N/A</li> <li>Stable/ active disease: N/A</li> <li>Treatment information: N/A</li> <li>Diagnosis and severity assessment: clinically and trichoscopically diagnosed AA</li> </ul> | <ul style="list-style-type: none"> <li>No. of subjects: 35 healthy controls randomly from our OPD with no history of AA (age- and sex-matched)</li> <li>Age: <math>29.2 \pm 7.6</math> years</li> <li>Gender: N/A</li> <li>Ethnicity: N/A</li> <li>BMI: <math>21.37 \pm 1.70</math> kg/m<sup>2</sup></li> <li>Comorbidity: N/A</li> <li>Smoking: N/A</li> <li>Alcohol: N/A</li> <li>Skin type: N/A</li> <li>Diet: N/A</li> <li>Sun-exposure/ sunscreen usage: N/A</li> </ul> |
| Vitamin D data              | <ul style="list-style-type: none"> <li>VDD: N/A</li> <li>Level: <math>16.6 \pm 5.9</math> ng/ml</li> <li>Correlation: vitamin D levels and SALT score, <math>r = -0.730</math>, p-value <math>&lt; 0.001</math>; vitamin D levels and number of patches, <math>r = -0.670</math>, p-value <math>&lt; 0.001</math></li> </ul>                                                                                                                                                                                                                                                                                                                                                                                                                                                                                                                                                                                    | <ul style="list-style-type: none"> <li>VDD: N/A</li> <li>Level: <math>40.5 \pm 5.7</math> ng/ml or <math>25.49 \pm 1.02</math> ng/ml *</li> </ul>                                                                                                                                                                                                                                                                                                                            |
| Vitamin D measurement       | <ul style="list-style-type: none"> <li>Measurement method: Chemiluminescence method/kit method (Siemens USA) as per manufacturers protocol, using Siemens ADVIA Centaur Analyzer</li> </ul>                                                                                                                                                                                                                                                                                                                                                                                                                                                                                                                                                                                                                                                                                                                     |                                                                                                                                                                                                                                                                                                                                                                                                                                                                              |
| Other                       | <ul style="list-style-type: none"> <li>Exclusion criteria: Patients suffering from any other dermatological condition or any systemic or autoimmune illness; Other causes of alopecia including scarring alopecia, androgenic alopecia, telogen effluvium, and female pattern hair loss; Patients who had received oral or topical medications during the past 4 weeks (topical, intralesional, or oral steroids, immunosuppressants, Vitamin D supplements, and topical vitamin D analogs); Pregnant and lactating females; Patients with body mass index (BMI:) more than 25</li> </ul>                                                                                                                                                                                                                                                                                                                       |                                                                                                                                                                                                                                                                                                                                                                                                                                                                              |

|  |                                                                                                                                                                               |
|--|-------------------------------------------------------------------------------------------------------------------------------------------------------------------------------|
|  | <ul style="list-style-type: none"><li>• * conflicting results between abstract and maintext, and so mean difference of vitamin D level from this study was not used</li></ul> |
|--|-------------------------------------------------------------------------------------------------------------------------------------------------------------------------------|



|                             |                                                                                                                                                                                                                                                                                                                                                                                                                                                                                                                                                                                                                                                                                                                                                                                                                          |                                                                                                                                                                                                                                                                                                                                                                                                                                         |
|-----------------------------|--------------------------------------------------------------------------------------------------------------------------------------------------------------------------------------------------------------------------------------------------------------------------------------------------------------------------------------------------------------------------------------------------------------------------------------------------------------------------------------------------------------------------------------------------------------------------------------------------------------------------------------------------------------------------------------------------------------------------------------------------------------------------------------------------------------------------|-----------------------------------------------------------------------------------------------------------------------------------------------------------------------------------------------------------------------------------------------------------------------------------------------------------------------------------------------------------------------------------------------------------------------------------------|
| Conic et al. (2017)         |                                                                                                                                                                                                                                                                                                                                                                                                                                                                                                                                                                                                                                                                                                                                                                                                                          |                                                                                                                                                                                                                                                                                                                                                                                                                                         |
| Study characteristics       | <ul style="list-style-type: none"> <li>Study type: retrospective, case-control, single-center study (Cleveland Clinic Alopecia registry)</li> <li>Study duration: 2005 to 2014</li> <li>Country: USA</li> </ul>                                                                                                                                                                                                                                                                                                                                                                                                                                                                                                                                                                                                          |                                                                                                                                                                                                                                                                                                                                                                                                                                         |
| Participant characteristics | <ul style="list-style-type: none"> <li>No. of subjects: 584 AA</li> <li>Age: <math>35.54 \pm 19.28</math> years</li> <li>Gender: Female 400 (68.50%), male 184 (31.50%)</li> <li>Ethnicity: N/A</li> <li>BMI: N/A</li> <li>Comorbidity: N/A</li> <li>Smoking: N/A</li> <li>Alcohol: N/A</li> <li>Skin type: N/A</li> <li>Diet: N/A</li> <li>Sun-exposure/ sunscreen usage: N/A</li> <li>Disease duration: N/A</li> <li>Disease severity score/grading: N/A</li> <li>Alopecia pattern: AA 553 (94.7%), AT 12 (2.05%) AU 19 (3.25%)</li> <li>FH of alopecia: N/A</li> <li>Nail involvement: N/A</li> <li>First/ recurrent episode: N/A</li> <li>Stable/ active disease: N/A</li> <li>Treatment information: N/A</li> <li>Diagnosis and severity assessment: diagnosis of AA by a Cleveland Clinic dermatologist</li> </ul> | <ul style="list-style-type: none"> <li>No. of subjects: 172 controls with seborrheic dermatitis (age-matched)</li> <li>Age: <math>35.80 \pm 15.56</math> years</li> <li>Gender: Female 126 (73.25%), male 46 (26.75%)</li> <li>Ethnicity: N/A</li> <li>BMI: N/A</li> <li>Comorbidity: N/A</li> <li>Smoking: N/A</li> <li>Alcohol: N/A</li> <li>Skin type: N/A</li> <li>Diet: N/A</li> <li>Sun-exposure/ sunscreen usage: N/A</li> </ul> |
| Vitamin D data              | <ul style="list-style-type: none"> <li>VDD: 228 (39.00%)</li> <li>Level: N/A</li> <li>Correlation: N/A</li> </ul>                                                                                                                                                                                                                                                                                                                                                                                                                                                                                                                                                                                                                                                                                                        | <ul style="list-style-type: none"> <li>VDD: 22 (12.79%)</li> <li>Level: N/A</li> </ul>                                                                                                                                                                                                                                                                                                                                                  |
| Vitamin D measurement       | <ul style="list-style-type: none"> <li>Definition: N/A</li> <li>Measurement method: N/A</li> </ul>                                                                                                                                                                                                                                                                                                                                                                                                                                                                                                                                                                                                                                                                                                                       |                                                                                                                                                                                                                                                                                                                                                                                                                                         |
| Other                       | <ul style="list-style-type: none"> <li>Selection criteria: the criteria for inclusion were diagnosis of AA by a Cleveland Clinic dermatologist and presence of a current comorbidities list in the patient's medical record; absence of hair loss in control group was assessed by hair loss specialists to ensure validity</li> </ul>                                                                                                                                                                                                                                                                                                                                                                                                                                                                                   |                                                                                                                                                                                                                                                                                                                                                                                                                                         |

|                             |                                                                                                                                                                                                                                                                                                                                                                                                                                                                                                                                                                                                                                                                                                                                                                                                                                                                                                                                                                                                          |                                                                                                                                                                                                                                                                                                                                                                                                                                                  |
|-----------------------------|----------------------------------------------------------------------------------------------------------------------------------------------------------------------------------------------------------------------------------------------------------------------------------------------------------------------------------------------------------------------------------------------------------------------------------------------------------------------------------------------------------------------------------------------------------------------------------------------------------------------------------------------------------------------------------------------------------------------------------------------------------------------------------------------------------------------------------------------------------------------------------------------------------------------------------------------------------------------------------------------------------|--------------------------------------------------------------------------------------------------------------------------------------------------------------------------------------------------------------------------------------------------------------------------------------------------------------------------------------------------------------------------------------------------------------------------------------------------|
| Erpolat et al. (2017)       |                                                                                                                                                                                                                                                                                                                                                                                                                                                                                                                                                                                                                                                                                                                                                                                                                                                                                                                                                                                                          |                                                                                                                                                                                                                                                                                                                                                                                                                                                  |
| Study characteristics       | <ul style="list-style-type: none"> <li>• Study type: case-control, single-center study</li> <li>• Study duration: October 2010 to March 2011 (during fall and winter)</li> <li>• Country: Turkey</li> </ul>                                                                                                                                                                                                                                                                                                                                                                                                                                                                                                                                                                                                                                                                                                                                                                                              |                                                                                                                                                                                                                                                                                                                                                                                                                                                  |
| Participant characteristics | <ul style="list-style-type: none"> <li>• No. of subjects: 41 AA</li> <li>• Age: <math>32.8 \pm 7.5</math> years</li> <li>• Gender: Female 15 (36.59%)</li> <li>• Ethnicity: N/A</li> <li>• BMI: N/A</li> <li>• Comorbidity: N/A</li> <li>• Smoking: N/A</li> <li>• Alcohol: N/A</li> <li>• Skin type: FPT II 8 (19.5%), III 21 (51.2%), IV 12 (29.3%)</li> <li>• Diet: N/A</li> <li>• Sun-exposure/ sunscreen usage: N/A</li> <li>• Disease duration (months): <math>&lt; 1 = 13</math> (31.7%), <math>1-3 = 10</math> (24.4%), <math>4-6 = 5</math> (12.2%), <math>&gt; 6 = 13</math> (31.7%)</li> <li>• Disease severity score/grading: N/A</li> <li>• Alopecia pattern: Single patch 15 (36.6%), multiple patches 26 (63.4%)</li> <li>• FH of alopecia: N/A</li> <li>• Nail involvement: N/A</li> <li>• First/ recurrent episode: N/A</li> <li>• Stable/ active disease: N/A</li> <li>• Treatment information: N/A</li> <li>• Diagnosis and severity assessment: department of dermatology</li> </ul> | <ul style="list-style-type: none"> <li>• No. of subjects: 32 healthy controls</li> <li>• Age: <math>32.7 \pm 7.5</math> years</li> <li>• Gender: Female 14 (43.75%)</li> <li>• Ethnicity: N/A</li> <li>• BMI: N/A</li> <li>• Comorbidity: N/A</li> <li>• Smoking: N/A</li> <li>• Alcohol: N/A</li> <li>• Skin type: FPT II 4 (12.5%), III 20 (62.5%), IV 8 (25.0%)</li> <li>• Diet: N/A</li> <li>• Sun-exposure/ sunscreen usage: N/A</li> </ul> |
| Vitamin D data              | <ul style="list-style-type: none"> <li>• VDD: 35 (85.3%)</li> <li>• VDI: 4 (9.8%)</li> <li>• Normal 2 (4.9%)</li> <li>• Level: 8.1 ng/ml (ranged from 5.0 to 38.6 ng/ml) → <math>8.1 \pm 8.4</math> ng/ml</li> <li>• Correlation: No correlation between between serum vitamin D level and severity of disease</li> </ul>                                                                                                                                                                                                                                                                                                                                                                                                                                                                                                                                                                                                                                                                                | <ul style="list-style-type: none"> <li>• VDD: 30 (93.8%)</li> <li>• VDI: 1 (3.1%)</li> <li>• Normal 1 (3.1%)</li> <li>• Level: 9.8 ng/ml (range 3.6 to 38.5 ng/ml) → <math>9.8 \pm 8.73</math> ng/ml</li> </ul>                                                                                                                                                                                                                                  |
| Vitamin D measurement       | <ul style="list-style-type: none"> <li>• Definition: VDD: <math>&lt; 20</math> ng/ml, VDI: 20-30 ng/ml, normal <math>&gt; 30</math> ng/ml</li> <li>• Measurement method: high performance liquid chromatography (HPLC) (Vertical Mark of Column device by UFLC-SHIMADZU, with features by Verti Sep™ GES C18HPLC Column, ImmuChrom GmbH lot number VD-130218F)</li> </ul>                                                                                                                                                                                                                                                                                                                                                                                                                                                                                                                                                                                                                                |                                                                                                                                                                                                                                                                                                                                                                                                                                                  |
| Other                       | <ul style="list-style-type: none"> <li>• Exclusion criteria: oral vitamin D supplementation, major cardiovascular disease, liver disease, kidney or digestive disease, treatment for AA 1 month before test-ing or refusal to have laboratory testing</li> </ul>                                                                                                                                                                                                                                                                                                                                                                                                                                                                                                                                                                                                                                                                                                                                         |                                                                                                                                                                                                                                                                                                                                                                                                                                                  |

| Ghafoor and Anwar (2017)    |                                                                                                                                                                                                                                                                                                                                                                                                                                                                                                                                                                                                                                                                                                                                                                                                                                                                                                                                                              |                                                                                                                                                                                                                                                                                                                                                                                                                 |
|-----------------------------|--------------------------------------------------------------------------------------------------------------------------------------------------------------------------------------------------------------------------------------------------------------------------------------------------------------------------------------------------------------------------------------------------------------------------------------------------------------------------------------------------------------------------------------------------------------------------------------------------------------------------------------------------------------------------------------------------------------------------------------------------------------------------------------------------------------------------------------------------------------------------------------------------------------------------------------------------------------|-----------------------------------------------------------------------------------------------------------------------------------------------------------------------------------------------------------------------------------------------------------------------------------------------------------------------------------------------------------------------------------------------------------------|
| Study characteristics       | <ul style="list-style-type: none"> <li>Study type: case-control, single-center study</li> <li>Study duration: October 2014 to March 2015</li> <li>Country: Pakistan</li> </ul>                                                                                                                                                                                                                                                                                                                                                                                                                                                                                                                                                                                                                                                                                                                                                                               |                                                                                                                                                                                                                                                                                                                                                                                                                 |
| Participant characteristics | <ul style="list-style-type: none"> <li>No. of subjects: 30 AA</li> <li>Age: <math>23.77 \pm 8.86</math> years</li> <li>Gender: Male 12 (40%), female 18 (60%)</li> <li>Ethnicity: N/A</li> <li>BMI: N/A</li> <li>Comorbidity: N/A</li> <li>Smoking: N/A</li> <li>Alcohol: N/A</li> <li>Skin type: N/A</li> <li>Diet: N/A</li> <li>Sun-exposure/ sunscreen usage: N/A</li> <li>Disease duration: N/A</li> <li>Disease severity score/grading: SALT class; S1 = 4 (13.33%), S2 = 7 (23.33%), S3 = 12 (40%), S4 = 1 (3.33%), S5 = 6 (20%), mean SALT score 57.8 (calculated)</li> <li>Alopecia pattern: Unifocal 6 (20%), multifocal 15 (50%), ophiasis 3 (0.9%), AU 2 (6.67%), AT 4 (13.33%)</li> <li>FH of alopecia: N/A</li> <li>Nail involvement: 10 (33.3%)</li> <li>First/ recurrent episode: N/A</li> <li>Stable/ active disease: N/A</li> <li>Treatment information: N/A</li> <li>Diagnosis and severity assessment: a trained dermatologist</li> </ul> | <ul style="list-style-type: none"> <li>No. of subjects: 30 controls (age- and gender-matched)</li> <li>Age: <math>24.03 \pm 8.62</math> years</li> <li>Gender: Male 12 (40%), female 18 (60%)</li> <li>Ethnicity: N/A</li> <li>BMI: N/A</li> <li>Comorbidity: N/A</li> <li>Smoking: N/A</li> <li>Alcohol: N/A</li> <li>Skin type: N/A</li> <li>Diet: N/A</li> <li>Sun-exposure/ sunscreen usage: N/A</li> </ul> |
| Vitamin D data              | <ul style="list-style-type: none"> <li>VDD: N/A</li> <li>Level: median 13.5 (IQR 18.6) ng/ml → <math>13.50 \pm 13.79</math> ng/ml</li> <li>Correlation: N/A</li> </ul>                                                                                                                                                                                                                                                                                                                                                                                                                                                                                                                                                                                                                                                                                                                                                                                       | <ul style="list-style-type: none"> <li>VDD: N/A</li> <li>Level: median 22.5 (IQR 16.25) ng/ml → <math>22.50 \pm 12.05</math> ng/ml</li> </ul>                                                                                                                                                                                                                                                                   |
| Vitamin D measurement       | <ul style="list-style-type: none"> <li>Definition: N/A</li> <li>Measurement method: Enzyme immunoassay method on chemical analyser by Hitachi (Roshe).</li> </ul>                                                                                                                                                                                                                                                                                                                                                                                                                                                                                                                                                                                                                                                                                                                                                                                            |                                                                                                                                                                                                                                                                                                                                                                                                                 |
| Other                       | <ul style="list-style-type: none"> <li>Exclusion criteria: patients who have taken systemicsteroids, calcium and vitamin D supplementations, bisphosphonates, immunosuppressive agents, received phototherapy during last 1 year, pregnant and lactating women, have autoimmune disorders, sarcoidosis renal disease, malignancy and malabsorption</li> </ul>                                                                                                                                                                                                                                                                                                                                                                                                                                                                                                                                                                                                |                                                                                                                                                                                                                                                                                                                                                                                                                 |

|                             |                                                                                                                                                                                                                                                                                                                                                                                                                                                                                                                                                                                                                                                                                                                                     |                                                                                                                                                                                                                                                                                                                                                                                                   |
|-----------------------------|-------------------------------------------------------------------------------------------------------------------------------------------------------------------------------------------------------------------------------------------------------------------------------------------------------------------------------------------------------------------------------------------------------------------------------------------------------------------------------------------------------------------------------------------------------------------------------------------------------------------------------------------------------------------------------------------------------------------------------------|---------------------------------------------------------------------------------------------------------------------------------------------------------------------------------------------------------------------------------------------------------------------------------------------------------------------------------------------------------------------------------------------------|
| Gurel et al. (2017)         |                                                                                                                                                                                                                                                                                                                                                                                                                                                                                                                                                                                                                                                                                                                                     |                                                                                                                                                                                                                                                                                                                                                                                                   |
| Study characteristics       | <ul style="list-style-type: none"> <li>Study type: prospective, case-control, single-center study</li> <li>Study duration: October 2016 – December 2016</li> <li>Country: Turkey</li> </ul>                                                                                                                                                                                                                                                                                                                                                                                                                                                                                                                                         |                                                                                                                                                                                                                                                                                                                                                                                                   |
| Participant characteristics | <ul style="list-style-type: none"> <li>No. of subjects: 80 CTE</li> <li>Age: <math>26.41 \pm 6.93</math> years</li> <li>Gender: Female 80 (100%)</li> <li>Ethnicity: N/A</li> <li>BMI: N/A</li> <li>Comorbidity: N/A</li> <li>Smoking: N/A</li> <li>Alcohol: N/A</li> <li>Skin type: N/A</li> <li>Diet: N/A</li> <li>Sun-exposure/ sunscreen usage: N/A</li> <li>Disease duration: N/A</li> <li>Disease severity score/grading: N/A</li> <li>Alopecia pattern: N/A</li> <li>FH of alopecia: N/A</li> <li>Nail involvement: N/A</li> <li>First/ recurrent episode: N/A</li> <li>Stable/ active disease: N/A</li> <li>Treatment information: N/A</li> <li>Diagnosis and severity assessment: dermatology outpatient clinic</li> </ul> | <ul style="list-style-type: none"> <li>No. of subjects: 80 controls (age- and gender-matched)</li> <li>Age: <math>25.79 \pm 7.41</math> years</li> <li>Gender: Female 80 (100%)</li> <li>Ethnicity: N/A</li> <li>BMI: N/A</li> <li>Comorbidity: N/A</li> <li>Smoking: N/A</li> <li>Alcohol: N/A</li> <li>Skin type: N/A</li> <li>Diet: N/A</li> <li>Sun-exposure/ sunscreen usage: N/A</li> </ul> |
| Vitamin D data              | <ul style="list-style-type: none"> <li>VDD: N/A</li> <li>Level: median 6.65 (IQR 3.30-27.30) ng/ml → <math>12.42 \pm 17.79</math> ng/ml</li> <li>Correlation: N/A</li> </ul>                                                                                                                                                                                                                                                                                                                                                                                                                                                                                                                                                        | <ul style="list-style-type: none"> <li>VDD: N/A</li> <li>Level: median 18.70 (IQR 4.50-59.60) ng/mL → <math>27.6 \pm 40.85</math> ng/ml</li> </ul>                                                                                                                                                                                                                                                |
| Vitamin D measurement       | <ul style="list-style-type: none"> <li>Definition: N/A</li> <li>Measurement method: Architect ci8200 Immunassay system.</li> </ul>                                                                                                                                                                                                                                                                                                                                                                                                                                                                                                                                                                                                  |                                                                                                                                                                                                                                                                                                                                                                                                   |
| Other                       | <ul style="list-style-type: none"> <li>Selection criteria: hair loss for more than 6 months, had no clinically significant hair loss in a certain region, no thinning or thinning in the central scalp region, and no signs of scar or atrophy; exclusion criteria: age &lt;18, &gt;45, male, drug that may cause hair loss (anticoagulant, retinoid, anticonvulsant, antidepressant, vitamin and iron supplement, pregnant, lactating)</li> <li>Median and IQR of vitamin D levels were converted to mean and SD</li> </ul>                                                                                                                                                                                                        |                                                                                                                                                                                                                                                                                                                                                                                                   |

|                             |                                                                                                                                                                                                                                                                                                                                                                                                                                                                                                                                                                                                                                                                                                                                                                                                                             |
|-----------------------------|-----------------------------------------------------------------------------------------------------------------------------------------------------------------------------------------------------------------------------------------------------------------------------------------------------------------------------------------------------------------------------------------------------------------------------------------------------------------------------------------------------------------------------------------------------------------------------------------------------------------------------------------------------------------------------------------------------------------------------------------------------------------------------------------------------------------------------|
| Narang et al. (2017)        |                                                                                                                                                                                                                                                                                                                                                                                                                                                                                                                                                                                                                                                                                                                                                                                                                             |
| Study characteristics       | <ul style="list-style-type: none"> <li>• Study type: prospective, cross-sectional single-center study</li> <li>• Study duration: N/A</li> <li>• Country: India</li> </ul>                                                                                                                                                                                                                                                                                                                                                                                                                                                                                                                                                                                                                                                   |
| Participant characteristics | <ul style="list-style-type: none"> <li>• No. of subjects: 22 AA (limited, &lt; 40% involvement)</li> <li>• Age: 30.4 ± 10.8 years</li> <li>• Gender: Female 10 (45.5%), male 12 (54.5%)</li> <li>• Ethnicity: N/A</li> <li>• BMI: N/A</li> <li>• Comorbidity: N/A</li> <li>• Smoking: N/A</li> <li>• Alcohol: N/A</li> <li>• Skin type: N/A</li> <li>• Diet: N/A</li> <li>• Sun-exposure/ sunscreen usage: N/A</li> <li>• Disease duration: median 42 weeks</li> <li>• Disease severity score/grading: SALT score ranged from 8.4 to 40</li> <li>• Alopecia pattern: N/A</li> <li>• FH of alopecia: N/A</li> <li>• Nail involvement: N/A</li> <li>• First/ recurrent episode: N/A</li> <li>• Stable/ active disease: N/A</li> <li>• Treatment information: N/A</li> <li>• Diagnosis and severity assessment: N/A</li> </ul> |
| Vitamin D data              | <ul style="list-style-type: none"> <li>• VDD: 20 (91%)</li> <li>• Level: N/A</li> <li>• Correlation: N/A</li> </ul>                                                                                                                                                                                                                                                                                                                                                                                                                                                                                                                                                                                                                                                                                                         |
| Vitamin D measurement       | <ul style="list-style-type: none"> <li>• Definition: VDD: &lt;20 ng/dL (assume ng/ml)</li> <li>• Measurement method: N/A</li> </ul>                                                                                                                                                                                                                                                                                                                                                                                                                                                                                                                                                                                                                                                                                         |
| Other                       | <ul style="list-style-type: none"> <li>• Exclusion criteria: patients on systemic vitamin D supplementation, alopecia totalis or alopecia universalis, pregnant and lactating females, and patients with other comorbidities like atopic dermatitis</li> </ul>                                                                                                                                                                                                                                                                                                                                                                                                                                                                                                                                                              |

|                             |                                                                                                                                                                                                                                                                                                                                                                                                                                                                                                                                                                                                                                                                                                                                                                                                                                                                                                                                                                                                                                                                                                   |                                                                                                                                                                                                                                                                                                                                                                                                                        |
|-----------------------------|---------------------------------------------------------------------------------------------------------------------------------------------------------------------------------------------------------------------------------------------------------------------------------------------------------------------------------------------------------------------------------------------------------------------------------------------------------------------------------------------------------------------------------------------------------------------------------------------------------------------------------------------------------------------------------------------------------------------------------------------------------------------------------------------------------------------------------------------------------------------------------------------------------------------------------------------------------------------------------------------------------------------------------------------------------------------------------------------------|------------------------------------------------------------------------------------------------------------------------------------------------------------------------------------------------------------------------------------------------------------------------------------------------------------------------------------------------------------------------------------------------------------------------|
| Attawa et al. (2016)        |                                                                                                                                                                                                                                                                                                                                                                                                                                                                                                                                                                                                                                                                                                                                                                                                                                                                                                                                                                                                                                                                                                   |                                                                                                                                                                                                                                                                                                                                                                                                                        |
| Study characteristics       | <ul style="list-style-type: none"> <li>• Study type: case-control, single-center study</li> <li>• Study duration: April 2014 to November 2014</li> <li>• Country: Egypt</li> </ul>                                                                                                                                                                                                                                                                                                                                                                                                                                                                                                                                                                                                                                                                                                                                                                                                                                                                                                                |                                                                                                                                                                                                                                                                                                                                                                                                                        |
| Participant characteristics | <ul style="list-style-type: none"> <li>• No. of subjects: 23 AA</li> <li>• Age: <math>26.44 \pm 10.87</math> years</li> <li>• Gender: Female 8 (34.8%), male 15 (65.2%)</li> <li>• Ethnicity: N/A</li> <li>• BMI: N/A</li> <li>• Comorbidity: N/A</li> <li>• Smoking: N/A</li> <li>• Alcohol: N/A</li> <li>• Skin type: N/A</li> <li>• Diet: N/A</li> <li>• Sun-exposure/ sunscreen usage: N/A</li> <li>• Disease duration: <math>9.35 \pm 16.88</math> years</li> <li>• Disease severity score/grading: SALT class; S1 = 14 (61%), S2 = 3 (13%), S3+S4+S5 = 6 (26%), mean SALT score 34.04 (calculated)</li> <li>• Alopecia pattern: Single patch 9 (39.2%), multiple patches 11 (47.8%), AT 2 (8.7%), AU 1 (4.3%)</li> <li>• FH of alopecia: N/A</li> <li>• Nail involvement: N/A</li> <li>• First/ recurrent episode: N/A</li> <li>• Stable/ active disease: N/A</li> <li>• Treatment information: N/A</li> <li>• Diagnosis and severity assessment: Dermatology, Venereology &amp; Andrology Department and Clinical Pathology Department, Faculty of medicine, Zagazig University</li> </ul> | <ul style="list-style-type: none"> <li>• No. of subjects: 23 healthy controls</li> <li>• Age: <math>29.39 \pm 8.10</math> years</li> <li>• Gender: Female 9 (39.1%), male 14 (60.9%)</li> <li>• Ethnicity: N/A</li> <li>• BMI: N/A</li> <li>• Comorbidity: N/A</li> <li>• Smoking: N/A</li> <li>• Alcohol: N/A</li> <li>• Skin type: N/A</li> <li>• Diet: N/A</li> <li>• Sun-exposure/ sunscreen usage: N/A</li> </ul> |
| Vitamin D data              | <ul style="list-style-type: none"> <li>• VDD: 5 (21.7%)</li> <li>• VDI: 16 (69.6%)</li> <li>• Normal 2 (8.7%)</li> <li>• Level: <math>14.13 \pm 8.72</math> ng/ml</li> <li>• Correlation: N/A</li> </ul>                                                                                                                                                                                                                                                                                                                                                                                                                                                                                                                                                                                                                                                                                                                                                                                                                                                                                          | <ul style="list-style-type: none"> <li>• VDD: 3 (13%)</li> <li>• VDI: 9 (39.1%)</li> <li>• Normal 11 (47.8%)</li> <li>• Level: <math>22.43 \pm 10.94</math> ng/ml</li> </ul>                                                                                                                                                                                                                                           |
| Vitamin D measurement       | <ul style="list-style-type: none"> <li>• Definition: VDD: &lt; 10 ng/ml, VDI: 10-30 ng/ml, normal &gt;30 ng/ml</li> <li>• Measurement method: ELISA technique</li> </ul>                                                                                                                                                                                                                                                                                                                                                                                                                                                                                                                                                                                                                                                                                                                                                                                                                                                                                                                          |                                                                                                                                                                                                                                                                                                                                                                                                                        |
| Other                       | <ul style="list-style-type: none"> <li>• Exclusion criteria: patients currently taking nutritional supplement, pregnancy, drug usage and other associated diseases that could alter the level of vitamin D were excluded from the study, also patients and controls with systemic diseases affecting the hair, autoimmune diseases, or history of atopy.</li> </ul>                                                                                                                                                                                                                                                                                                                                                                                                                                                                                                                                                                                                                                                                                                                               |                                                                                                                                                                                                                                                                                                                                                                                                                        |



| Bakry et al. (2016)         |                                                                                                                                                                                                                                                                                                                                                                                                                                                                                                                                                                                                                                                                                                                                                                                                                                                                                                                                 |                                                                                                                                                                                                                                                                                                                                                                                                                                                                                                    |
|-----------------------------|---------------------------------------------------------------------------------------------------------------------------------------------------------------------------------------------------------------------------------------------------------------------------------------------------------------------------------------------------------------------------------------------------------------------------------------------------------------------------------------------------------------------------------------------------------------------------------------------------------------------------------------------------------------------------------------------------------------------------------------------------------------------------------------------------------------------------------------------------------------------------------------------------------------------------------|----------------------------------------------------------------------------------------------------------------------------------------------------------------------------------------------------------------------------------------------------------------------------------------------------------------------------------------------------------------------------------------------------------------------------------------------------------------------------------------------------|
| Study characteristics       | <ul style="list-style-type: none"> <li>Study type: case-control, single-center study</li> <li>Study duration: October 2013 to March 2014</li> <li>Country: Egypt</li> </ul>                                                                                                                                                                                                                                                                                                                                                                                                                                                                                                                                                                                                                                                                                                                                                     |                                                                                                                                                                                                                                                                                                                                                                                                                                                                                                    |
| Participant characteristics | <ul style="list-style-type: none"> <li>No. of subjects: 60 AA</li> <li>Age: <math>20.7 \pm 10.85</math> years</li> <li>Gender: Male 36 (60%), female 24 (40%)</li> <li>Ethnicity: N/A</li> <li>BMI: <math>20.56 \pm 4.28</math> kg/m<sup>2</sup></li> <li>Comorbidity: N/A</li> <li>Smoking: N/A</li> <li>Alcohol: N/A</li> <li>Skin type: FPT III 26 (43.3%), IV 34 (56.7%)</li> <li>Diet: N/A</li> <li>Sun-exposure / sunscreen usage: N/A</li> <li>Disease duration: <math>2.36 \pm 2.85</math> months</li> <li>Disease severity score/grading: N/A</li> <li>Alopecia pattern: patchy 32 (53.3%), ophiasis 12 (20%), AT/AU 16 (26.7%)</li> <li>FH of alopecia: N/A</li> <li>Nail involvement: 12 (20.0%)</li> <li>First/ recurrent episode: recurrent 10 (16.7%), nonrecurrent 50 (83.3)</li> <li>Stable/ active disease: N/A</li> <li>Treatment information: N/A</li> <li>Diagnosis and severity assessment: N/A</li> </ul> | <ul style="list-style-type: none"> <li>No. of subjects: 60 controls (age-, gender-, FPT-, and BMI-matched)</li> <li>Age: <math>23.71 \pm 7.45</math> years</li> <li>Gender: Male 28 (46.7%), female 32 (53.3%)</li> <li>Ethnicity: N/A</li> <li>BMI: <math>20.6 \pm 2.98</math> kg/m<sup>2</sup></li> <li>Comorbidity: N/A</li> <li>Smoking: N/A</li> <li>Alcohol: N/A</li> <li>Skin type: FPT III 24 (40%), IV 36 (60%)</li> <li>Diet: N/A</li> <li>Sun-exposure/ sunscreen usage: N/A</li> </ul> |
| Vitamin D data              | <ul style="list-style-type: none"> <li>VDD: 50 (83.3%)</li> <li>Normal 10 (16.7%)</li> <li>Level: <math>44.04 \pm 15.61</math> nmol/l → <math>17.62 \pm 6.24</math> ng/ml</li> <li>Correlation: Severe AA showed significantly the lowest vitamin D levels compared with cases with mild (<math>P = 0.002</math>) and moderate disease (<math>P = 0.03</math>); A significant inverse correlation was found between 25-hydroxyvitamin D levels and age of the patients (<math>r = -0.38</math>; <math>P = 0.03</math>).; No significant association between vitamin D levels and gender, disease duration, disease recurrence, nail affection, duration of sun exposure/ day, or positive family history of AA.</li> </ul>                                                                                                                                                                                                      | <ul style="list-style-type: none"> <li>VDD: 14 (23.3%)</li> <li>Normal 46 (76.7%)</li> <li>Level: <math>66.07 \pm 17.40</math> nmol/l → <math>26.43 \pm 6.96</math> ng/ml</li> </ul>                                                                                                                                                                                                                                                                                                               |
| Vitamin D measurement       | <ul style="list-style-type: none"> <li>Definition: VDD: &lt;50 nmol/L, VDI: 50–75 nmol/l, Normal &gt;75 nmol/L</li> </ul>                                                                                                                                                                                                                                                                                                                                                                                                                                                                                                                                                                                                                                                                                                                                                                                                       |                                                                                                                                                                                                                                                                                                                                                                                                                                                                                                    |



|       |                                                                                                                                                                                                                                                                                                                                                                                                                                                                                                                                                                                                                                                                                                                                                                                                                                                                                                                                                                 |
|-------|-----------------------------------------------------------------------------------------------------------------------------------------------------------------------------------------------------------------------------------------------------------------------------------------------------------------------------------------------------------------------------------------------------------------------------------------------------------------------------------------------------------------------------------------------------------------------------------------------------------------------------------------------------------------------------------------------------------------------------------------------------------------------------------------------------------------------------------------------------------------------------------------------------------------------------------------------------------------|
|       | <ul style="list-style-type: none"> <li>Measurement method: Commercial Enzyme-Linked Immunosorbent Assay (ELISA) kits (Immunodiagnostic Systems Limited, Bolden, UK).</li> </ul>                                                                                                                                                                                                                                                                                                                                                                                                                                                                                                                                                                                                                                                                                                                                                                                 |
| Other | <ul style="list-style-type: none"> <li>Exclusion criteria: patients with a history of topical or systemic treatment (corticosteroids, intralesional steroid injection, immunosuppressive therapy, vitamin D or calcium supplementation, bisphosphonates, hepatic enzyme inducers, anticonvulsants and anticancer medications, and cholesterol lowering drugs) within 4 weeks of the study, patients receiving phototherapy within 6 months of the study, patients with a history of diabetes mellitus, anemia, thyroid disorders, chronic liver or renal diseases, atopy, parathyroid disorders, patients with known autoimmune diseases or cancer, patients with congenital or acquired errors of calcium or phosphorus metabolism, subjects with inadequate sun exposure and obese subjects, pregnant or lactating women, subjects with skin phototypes V, and VI, and smokers</li> <li>Typo in manuscript, so we assume nmol/L instead of nmol/mL</li> </ul> |

| Banihashemi et al. (2016)   |                                                                                                                                                                                                                                                                                                                                                                                                                                                                                                                                                                                                                                                                                                                                                                                                                                                                                                                                       |                                                                                                                                                                                                                                                                                                                                                                                                                                                                                                                       |
|-----------------------------|---------------------------------------------------------------------------------------------------------------------------------------------------------------------------------------------------------------------------------------------------------------------------------------------------------------------------------------------------------------------------------------------------------------------------------------------------------------------------------------------------------------------------------------------------------------------------------------------------------------------------------------------------------------------------------------------------------------------------------------------------------------------------------------------------------------------------------------------------------------------------------------------------------------------------------------|-----------------------------------------------------------------------------------------------------------------------------------------------------------------------------------------------------------------------------------------------------------------------------------------------------------------------------------------------------------------------------------------------------------------------------------------------------------------------------------------------------------------------|
| Study characteristics       | <ul style="list-style-type: none"> <li>• Study type: case-control, single-center study</li> <li>• Study duration: N/A (Autumn)</li> <li>• Country: Iran</li> </ul>                                                                                                                                                                                                                                                                                                                                                                                                                                                                                                                                                                                                                                                                                                                                                                    |                                                                                                                                                                                                                                                                                                                                                                                                                                                                                                                       |
| Participant characteristics | <ul style="list-style-type: none"> <li>• No. of subjects: 45 FPHL</li> <li>• Age: <math>29.11 \pm 7.31</math> years</li> <li>• Gender: Female 45 (100 %)</li> <li>• Ethnicity: N/A</li> <li>• BMI: <math>22.94 \pm 3.27</math> kg/m<sup>2</sup></li> <li>• Comorbidity: N/A</li> <li>• Smoking: N/A</li> <li>• Alcohol: N/A</li> <li>• Skin type: N/A</li> <li>• Diet: N/A</li> <li>• Sun-exposure/ sunscreen usage: N/A</li> <li>• Disease duration: 2 years (IQR 1-5)</li> <li>• Disease severity score/grading: Ludwig classification (by a questionnaire developed for the study) Grade I 28 (66.7%), Grade II 12 (28.6%), Grade III 2 (4.8%)</li> <li>• Alopecia pattern: N/A</li> <li>• FH of alopecia: N/A</li> <li>• Nail involvement: N/A</li> <li>• First/ recurrent episode: N/A</li> <li>• Stable/ active disease: N/A</li> <li>• Treatment information: N/A</li> <li>• Diagnosis and severity assessment: N/A</li> </ul> | <ul style="list-style-type: none"> <li>• No. of subjects: 45 healthy controls (age-, gender-, hours spent under sunlight per day-, and BMI-matched)</li> <li>• Age: <math>28.82 \pm 7.11</math> years</li> <li>• Gender: Female 45 (100 %)</li> <li>• Ethnicity: N/A</li> <li>• BMI: <math>22.78 \pm 3.07</math> kg/m<sup>2</sup></li> <li>• Comorbidity: N/A</li> <li>• Smoking: N/A</li> <li>• Alcohol: N/A</li> <li>• Skin type: N/A</li> <li>• Diet: N/A</li> <li>• Sun-exposure/ sunscreen usage: N/A</li> </ul> |
| Vitamin D data              | <ul style="list-style-type: none"> <li>• VDD: 36 (80%)</li> <li>• VDI: 5 (11.1%)</li> <li>• Normal 4 (8.9%)</li> <li>• Level: <math>13.45 \pm 8.40</math> ng/ml</li> <li>• Correlation: No significant correlation between serum levels of Vitamin D3 and age (<math>r = 0.08</math>, <math>P = 0.61</math>), BMI (<math>r = -0.06</math>, <math>P = 0.69</math>), and FPHL duration (<math>r = 0.04</math>, <math>P = 0.77</math>).; No significant relation between serum Vitamin D3 level and family history of FPHL, menstrual disorder, hirsutism, Ludwig score of alopecia severity, and skin type of the patients.</li> </ul>                                                                                                                                                                                                                                                                                                  | <ul style="list-style-type: none"> <li>• VDD: 32 (71.1%)</li> <li>• VDI: 6 (13.3%)</li> <li>• Normal 7 (15.6%)</li> <li>• Level: <math>17.16 \pm 8.96</math> ng/ml</li> </ul>                                                                                                                                                                                                                                                                                                                                         |
| Vitamin D measurement       | <ul style="list-style-type: none"> <li>• Definition: VDD: &lt;20 ng/ml, VDI: 20-30 ng/ml, normal &gt; 30 ng/ml</li> <li>• Measurement method: ELISA method</li> </ul>                                                                                                                                                                                                                                                                                                                                                                                                                                                                                                                                                                                                                                                                                                                                                                 |                                                                                                                                                                                                                                                                                                                                                                                                                                                                                                                       |

|       |                                                                                                                                                                                                                                                                                                                                                                                                                                                                 |
|-------|-----------------------------------------------------------------------------------------------------------------------------------------------------------------------------------------------------------------------------------------------------------------------------------------------------------------------------------------------------------------------------------------------------------------------------------------------------------------|
| Other | <ul style="list-style-type: none"><li>• Exclusion criteria: topical treatment with vitamin D3 compounds or systemic therapy(phototherapy) within the past month, use of vitamin D3 supplements, and other chronic inflammatory diseases such as multiple sclerosis, inflammatory bowel diseases, rheumatoid arthritis, insulin-dependent diabetes mellitus, systemic lupus erythematosus, lymphoma, nonmelanoma skin cancer, or any history of cancer</li></ul> |
|-------|-----------------------------------------------------------------------------------------------------------------------------------------------------------------------------------------------------------------------------------------------------------------------------------------------------------------------------------------------------------------------------------------------------------------------------------------------------------------|

|                             |                                                                                                                                                                                                                                                                                                                                                                                                                                                                                                                                                                                                                                                                                                                                                                                       |
|-----------------------------|---------------------------------------------------------------------------------------------------------------------------------------------------------------------------------------------------------------------------------------------------------------------------------------------------------------------------------------------------------------------------------------------------------------------------------------------------------------------------------------------------------------------------------------------------------------------------------------------------------------------------------------------------------------------------------------------------------------------------------------------------------------------------------------|
| Cheung et al. (2016)        |                                                                                                                                                                                                                                                                                                                                                                                                                                                                                                                                                                                                                                                                                                                                                                                       |
| Study characteristics       | <ul style="list-style-type: none"> <li>• Study type: retrospective, cross-sectional descriptive, single-center study</li> <li>• Study duration: June 2012 to December 2014</li> <li>• Country: USA</li> </ul>                                                                                                                                                                                                                                                                                                                                                                                                                                                                                                                                                                         |
| Participant characteristics | <ul style="list-style-type: none"> <li>• No. of subjects: 413 acute and chronic TE (115 with lab results)</li> <li>• Age: range 16 to 89</li> <li>• Gender: Female 110, male 5</li> <li>• Ethnicity: N/A</li> <li>• BMI: N/A</li> <li>• Comorbidity: N/A</li> <li>• Smoking: N/A</li> <li>• Alcohol: N/A</li> <li>• Skin type: N/A</li> <li>• Diet: N/A</li> <li>• Sun-exposure/ sunscreen usage: N/A</li> <li>• Disease duration: N/A</li> <li>• Disease severity score/grading: N/A</li> <li>• Alopecia pattern: N/A</li> <li>• FH of alopecia: N/A</li> <li>• Nail involvement: N/A</li> <li>• First/ recurrent episode: N/A</li> <li>• Stable/ active disease: N/A</li> <li>• Treatment information: N/A</li> <li>• Diagnosis and severity assessment: a dermatologist</li> </ul> |
| Vitamin D data              | <ul style="list-style-type: none"> <li>• VDD: 39 (33.9%)</li> <li>• Level: N/A</li> <li>• Correlation: N/A</li> </ul>                                                                                                                                                                                                                                                                                                                                                                                                                                                                                                                                                                                                                                                                 |
| Vitamin D measurement       | <ul style="list-style-type: none"> <li>• Definition: VDD: &lt; 30 nmol/L (12 ng/ml)</li> <li>• Measurement method: N/A</li> </ul>                                                                                                                                                                                                                                                                                                                                                                                                                                                                                                                                                                                                                                                     |
| Other                       | <ul style="list-style-type: none"> <li>• Exclusion criteria: N/A</li> </ul>                                                                                                                                                                                                                                                                                                                                                                                                                                                                                                                                                                                                                                                                                                           |

|                             |                                                                                                                                                                                                                                                                                                                                                                                                                                                                                                                                                                                                                                                                                                                                                                                                                                                                                                                                                                                                                                                                                                  |                                                                                                                                                                                                                                                                                                                                                                                                                                        |
|-----------------------------|--------------------------------------------------------------------------------------------------------------------------------------------------------------------------------------------------------------------------------------------------------------------------------------------------------------------------------------------------------------------------------------------------------------------------------------------------------------------------------------------------------------------------------------------------------------------------------------------------------------------------------------------------------------------------------------------------------------------------------------------------------------------------------------------------------------------------------------------------------------------------------------------------------------------------------------------------------------------------------------------------------------------------------------------------------------------------------------------------|----------------------------------------------------------------------------------------------------------------------------------------------------------------------------------------------------------------------------------------------------------------------------------------------------------------------------------------------------------------------------------------------------------------------------------------|
| Darwish et al. (2016)       |                                                                                                                                                                                                                                                                                                                                                                                                                                                                                                                                                                                                                                                                                                                                                                                                                                                                                                                                                                                                                                                                                                  |                                                                                                                                                                                                                                                                                                                                                                                                                                        |
| Study characteristics       | <ul style="list-style-type: none"> <li>• Study type: prospective, case-control, single-center study</li> <li>• Study duration: April 2014 to November 2014</li> <li>• Country: Egypt</li> </ul>                                                                                                                                                                                                                                                                                                                                                                                                                                                                                                                                                                                                                                                                                                                                                                                                                                                                                                  |                                                                                                                                                                                                                                                                                                                                                                                                                                        |
| Participant characteristics | <ul style="list-style-type: none"> <li>• No. of subjects: 30 AA</li> <li>• Age: <math>28.67 \pm 10</math> years</li> <li>• Gender: Male 13 (43.3%), female 17 (56.7%)</li> <li>• Ethnicity: N/A</li> <li>• BMI: N/A</li> <li>• Comorbidity: N/A</li> <li>• Smoking: N/A</li> <li>• Alcohol: N/A</li> <li>• Skin type: N/A</li> <li>• Diet: N/A</li> <li>• Sun-exposure/ sunscreen usage: N/A</li> <li>• Disease duration: &lt;6 months 15 (50%), &gt;6 months 15 (50%)</li> <li>• Disease severity score/grading: SALT score: S1= 10 (33.3%), S2= 7 (23.3%), S3= 4 (13.3%), S4= 3 (10%), S5= 1 (3.3%), S4 B= 3 (10%), S5 B= 2 (6.7), mean SALT score 39.64% (calculated)</li> <li>• Alopecia pattern: Patchy AA 20 (66.7%), AT&amp;AU 10 (33.3%)</li> <li>• FH of alopecia: N/A</li> <li>• Nail involvement: N/A</li> <li>• First/ recurrent episode: N/A</li> <li>• Stable/ active disease: N/A</li> <li>• Treatment information: N/A</li> <li>• Diagnosis and severity assessment: outpatient clinic of Dermatology, Andrology and STDs department in Mansoura University Hospital.</li> </ul> | <ul style="list-style-type: none"> <li>• No. of subjects: 20 healthy controls (age- and sex-matched)</li> <li>• Age: <math>24.8 \pm 6</math> years</li> <li>• Gender: Male 10 (50%), female 10 (50%)</li> <li>• Ethnicity: N/A</li> <li>• BMI: N/A</li> <li>• Comorbidity: N/A</li> <li>• Smoking: N/A</li> <li>• Alcohol: N/A</li> <li>• Skin type: N/A</li> <li>• Diet: N/A</li> <li>• Sun-exposure/ sunscreen usage: N/A</li> </ul> |
| Vitamin D data              | <ul style="list-style-type: none"> <li>• VDD: N/A</li> <li>• Level: <math>7.52 \pm 6.24</math> ng/ml</li> <li>• Correlation: No significant correlation was found between SALT score and vitamin D.</li> </ul>                                                                                                                                                                                                                                                                                                                                                                                                                                                                                                                                                                                                                                                                                                                                                                                                                                                                                   | <ul style="list-style-type: none"> <li>• VDD: N/A</li> <li>• Level: <math>31.70 \pm 12.29</math> ng/ml</li> </ul>                                                                                                                                                                                                                                                                                                                      |
| Vitamin D measurement       | <ul style="list-style-type: none"> <li>• Definition: N/A</li> <li>• Measurement method: ELISA kits (SunRedbio, Shanghai).</li> </ul>                                                                                                                                                                                                                                                                                                                                                                                                                                                                                                                                                                                                                                                                                                                                                                                                                                                                                                                                                             |                                                                                                                                                                                                                                                                                                                                                                                                                                        |
| Other                       | <ul style="list-style-type: none"> <li>• Exclusion criteria: any patient taking vitamin D supplementation, iron preparations, vitamin B, folic acid or calcium (Ca) supplementations in the last 6 months, patients treated with topical vitamin D3 analog, patients known to have a state of vitamin D deficiency (to avoid the selection bias), patients with any associated disease that alter the blood 25(OH)D level as vitiligo, psoriasis, SLE, renal disease, liver disease, cancers and autoimmune diseases.</li> </ul>                                                                                                                                                                                                                                                                                                                                                                                                                                                                                                                                                                 |                                                                                                                                                                                                                                                                                                                                                                                                                                        |



| Fattah and Darwish (2015)   |                                                                                                                                                                                                                                                                                                                                                                                                                                                                                                                                                                                                                                                                                                                                                                                                                                                                                                                                                                                                                                                     |                                                                                                                                                                                                                                                                                                                                                                                                                                                                                                                                        |
|-----------------------------|-----------------------------------------------------------------------------------------------------------------------------------------------------------------------------------------------------------------------------------------------------------------------------------------------------------------------------------------------------------------------------------------------------------------------------------------------------------------------------------------------------------------------------------------------------------------------------------------------------------------------------------------------------------------------------------------------------------------------------------------------------------------------------------------------------------------------------------------------------------------------------------------------------------------------------------------------------------------------------------------------------------------------------------------------------|----------------------------------------------------------------------------------------------------------------------------------------------------------------------------------------------------------------------------------------------------------------------------------------------------------------------------------------------------------------------------------------------------------------------------------------------------------------------------------------------------------------------------------------|
| Study characteristics       | <ul style="list-style-type: none"> <li>Study type: case-control, single-center study</li> <li>Study duration: June 2011 to August 2012 (summer)</li> <li>Country: Egypt</li> </ul>                                                                                                                                                                                                                                                                                                                                                                                                                                                                                                                                                                                                                                                                                                                                                                                                                                                                  |                                                                                                                                                                                                                                                                                                                                                                                                                                                                                                                                        |
| Participant characteristics | <ul style="list-style-type: none"> <li>No. of subjects: 30 AA (recalcitrant and/or extensive – AU, AT, multiple patches of AA, &gt;50% scalp involvement)</li> <li>Age: <math>26.8 \pm 6.9</math> years</li> <li>Gender: Male 18 (60 %), female 12 (40 %)</li> <li>Ethnicity: N/A</li> <li>BMI: N/A</li> <li>Comorbidity: N/A</li> <li>Smoking: N/A</li> <li>Alcohol: N/A</li> <li>Skin type: FPT III 19, IV 11</li> <li>Diet: N/A</li> <li>Sun-exposure/ sunscreen usage: 18 male and 2 female had outdoor occupation</li> <li>Disease duration: <math>4 \pm 1.5</math> years</li> <li>Disease severity score/grading: SALT class; S3 = 15 (50 %), S4 = 3 (10 %), S5 = 12 (40 %), B0 = 27 (90%), B2 = 3 (10%), mean SALT score 79.45% (calculated)</li> <li>Alopecia pattern: N/A</li> <li>FH of alopecia: N/A</li> <li>Nail involvement: N/A</li> <li>First/ recurrent episode: N/A</li> <li>Stable/ active disease: N/A</li> <li>Treatment information: N/A</li> <li>Diagnosis and severity assessment: Outpatient Dermatology Clinic</li> </ul> | <ul style="list-style-type: none"> <li>No. of subjects: 30 healthy controls (age-, sex-, FPT-, approximate daily amount of vitamin D intake-, occupation (indoor or outdoor)- , and time of blood sampling- matched)</li> <li>Age: <math>25.1 \pm 6.9</math> years</li> <li>Gender: Male 18 (60 %), female 12 (40 %)</li> <li>Ethnicity: N/A</li> <li>BMI: N/A</li> <li>Comorbidity: N/A</li> <li>Smoking: N/A</li> <li>Alcohol: N/A</li> <li>Skin type: N/A</li> <li>Diet: N/A</li> <li>Sun-exposure/ sunscreen usage: N/A</li> </ul> |
| Vitamin D data              | <ul style="list-style-type: none"> <li>VDD: 28 (93.3%)</li> <li>VDI: 2 (6.67%)</li> <li>Normal 0 (0%)</li> <li>Level: <math>18.4 \pm 3.39</math> ng/ml</li> <li>Correlation: vitamin D level (before treatment) and SALT score: <math>r = -0.895</math>, <math>p\text{-value} = 0.001</math>; vitamin D level (after treatment) and SALT score: <math>r = -0.7202</math>, <math>p\text{-value} = 0.001</math>; vitamin D level (before treatment) and disease duration: <math>r = -0.085</math>, <math>p = 0.655</math></li> </ul>                                                                                                                                                                                                                                                                                                                                                                                                                                                                                                                  | <ul style="list-style-type: none"> <li>VDD: 0 (0%)</li> <li>VDI: 3 (10%)</li> <li>Normal 27 (90%)</li> <li>Level: <math>45.2 \pm 20.5</math> ng/ml</li> </ul>                                                                                                                                                                                                                                                                                                                                                                          |
| Vitamin D measurement       | <ul style="list-style-type: none"> <li>Definition: VDD: <math>\leq 20</math> ng/ml; VDI: <math>&gt;20</math> to <math>&lt;30</math> ng/ml, normal <math>\geq 30</math> ng/ml</li> </ul>                                                                                                                                                                                                                                                                                                                                                                                                                                                                                                                                                                                                                                                                                                                                                                                                                                                             |                                                                                                                                                                                                                                                                                                                                                                                                                                                                                                                                        |

|       |                                                                                                                                                                                                                                                                                                                                                                                                                                                                                                                                                                                                                                          |
|-------|------------------------------------------------------------------------------------------------------------------------------------------------------------------------------------------------------------------------------------------------------------------------------------------------------------------------------------------------------------------------------------------------------------------------------------------------------------------------------------------------------------------------------------------------------------------------------------------------------------------------------------------|
|       | <ul style="list-style-type: none"> <li>Measurement method: enzyme-linked immunosorbent assay technique (EIA-5396; DRG International Inc., Springfield, New Jersey, USA).</li> </ul>                                                                                                                                                                                                                                                                                                                                                                                                                                                      |
| Other | <ul style="list-style-type: none"> <li>Exclusion criteria: pregnancy, lactation, smoking, obesity, malabsorption disorders, kidney or liver diseases or the use of any drug including vitamin D or calcium supplements, weight loss drugs, cholesterol-lowering drugs, systemic steroids, hepatic enzyme inducers, and thiazide diuretics, patients applying sunscreen or receiving phototherapy or photochemotherapy in the last 6 months and patients with contraindications to PUVA or NB-UVB, such as patients having any photosensitive condition or with a predisposition to or actually having cutaneous malignancies.</li> </ul> |



|                             |                                                                                                                                                                                                                                                                                                                                                                                                                                                                                                                                                                                                                                                                                                                                                                                                                                                                                                                                               |                                                                                                                                                                                                                                                                                                                                                                                                                                                    |
|-----------------------------|-----------------------------------------------------------------------------------------------------------------------------------------------------------------------------------------------------------------------------------------------------------------------------------------------------------------------------------------------------------------------------------------------------------------------------------------------------------------------------------------------------------------------------------------------------------------------------------------------------------------------------------------------------------------------------------------------------------------------------------------------------------------------------------------------------------------------------------------------------------------------------------------------------------------------------------------------|----------------------------------------------------------------------------------------------------------------------------------------------------------------------------------------------------------------------------------------------------------------------------------------------------------------------------------------------------------------------------------------------------------------------------------------------------|
| Ogrum et al. (2015)         |                                                                                                                                                                                                                                                                                                                                                                                                                                                                                                                                                                                                                                                                                                                                                                                                                                                                                                                                               |                                                                                                                                                                                                                                                                                                                                                                                                                                                    |
| Study characteristics       | <ul style="list-style-type: none"> <li>Study type: case-control, single-center study</li> <li>Study duration: March to May 2011</li> <li>Country: Turkey</li> </ul>                                                                                                                                                                                                                                                                                                                                                                                                                                                                                                                                                                                                                                                                                                                                                                           |                                                                                                                                                                                                                                                                                                                                                                                                                                                    |
| Participant characteristics | <ul style="list-style-type: none"> <li>No. of subjects: 40 AA</li> <li>Age: <math>31.23 \pm 7.34</math> years</li> <li>Gender: Female 21 (52.5%)</li> <li>Ethnicity: N/A</li> <li>BMI: N/A</li> <li>Comorbidity: N/A</li> <li>Smoking: N/A</li> <li>Alcohol: N/A</li> <li>Skin type: FPT I-III 6 (15%), IV-VI 34 (85%)</li> <li>Diet: N/A</li> <li>Sun-exposure/ sunscreen usage: N/A</li> <li>Disease duration: N/A</li> <li>Disease severity score/grading: SALT class; S1 = 35 (87.5%), S2 = 3 (7.5%), S3 = 2 (5%), mean SALT score 16.79 (calculated)</li> <li>Alopecia pattern: patchy 37 (92.5%), ophiasis 2 (5%), reticularis 1 (2.5%)</li> <li>FH of alopecia: N/A</li> <li>Nail involvement: N/A</li> <li>First/ recurrent episode: recurrent 16 (40%), acute 24 (60%)</li> <li>Stable/ active disease: N/A</li> <li>Treatment information: N/A</li> <li>Diagnosis and severity assessment: dermatology outpatient clinic</li> </ul> | <ul style="list-style-type: none"> <li>No. of subjects: 40 controls (age-, gender- and skin phenotype- matched)</li> <li>Age: <math>30.58 \pm 7.19</math> years</li> <li>Gender: Female 21 (52.5%)</li> <li>Ethnicity: N/A</li> <li>BMI: N/A</li> <li>Comorbidity: N/A</li> <li>Smoking: N/A</li> <li>Alcohol: N/A</li> <li>Skin type: FPT I-III 6 (15%), IV-VI 34 (85%)</li> <li>Diet: N/A</li> <li>Sun-exposure/ sunscreen usage: N/A</li> </ul> |
| Vitamin D data              | <ul style="list-style-type: none"> <li>VDD: 33 (82.5%)</li> <li>VDI: 6 (15%)</li> <li>Normal 1 (2.5%)</li> <li>Level: N/A</li> <li>Correlation: N/A</li> </ul>                                                                                                                                                                                                                                                                                                                                                                                                                                                                                                                                                                                                                                                                                                                                                                                | <ul style="list-style-type: none"> <li>VDD: 29 (72.5%)</li> <li>VDI: 10 (25%)</li> <li>Normal 1 (2.5%)</li> <li>Level: N/A</li> </ul>                                                                                                                                                                                                                                                                                                              |
| Vitamin D measurement       | <ul style="list-style-type: none"> <li>Definitions: VDD: &lt; 15 ng/ml, VDI: 15-30 ng/ml, Normal &gt; 30 ng/ml</li> <li>Measurement method: radioimmunoassay method</li> </ul>                                                                                                                                                                                                                                                                                                                                                                                                                                                                                                                                                                                                                                                                                                                                                                |                                                                                                                                                                                                                                                                                                                                                                                                                                                    |
| Other                       | <ul style="list-style-type: none"> <li>Exclusion criteria: systemic steroids usage in the last 3 months, vitamin D or calcium supplements, kidney or liver disease, not in the age group of 20-50, menopausal</li> </ul>                                                                                                                                                                                                                                                                                                                                                                                                                                                                                                                                                                                                                                                                                                                      |                                                                                                                                                                                                                                                                                                                                                                                                                                                    |

|                             |                                                                                                                                                                                                                                                                                                                                                                                                                                                                                                                                                                                                                                                                                                                                                                                                                                                                                                                                                                                              |                                                                                                                                                                                                                                                                                                                                                                                                                                                                       |
|-----------------------------|----------------------------------------------------------------------------------------------------------------------------------------------------------------------------------------------------------------------------------------------------------------------------------------------------------------------------------------------------------------------------------------------------------------------------------------------------------------------------------------------------------------------------------------------------------------------------------------------------------------------------------------------------------------------------------------------------------------------------------------------------------------------------------------------------------------------------------------------------------------------------------------------------------------------------------------------------------------------------------------------|-----------------------------------------------------------------------------------------------------------------------------------------------------------------------------------------------------------------------------------------------------------------------------------------------------------------------------------------------------------------------------------------------------------------------------------------------------------------------|
| Cerman et al. (2014)        |                                                                                                                                                                                                                                                                                                                                                                                                                                                                                                                                                                                                                                                                                                                                                                                                                                                                                                                                                                                              |                                                                                                                                                                                                                                                                                                                                                                                                                                                                       |
| Study characteristics       | <ul style="list-style-type: none"> <li>• Study type: cross-sectional case-control, single-center study</li> <li>• Study duration: November 21, 2012 to March 21, 2013</li> <li>• Country: Turkey</li> </ul>                                                                                                                                                                                                                                                                                                                                                                                                                                                                                                                                                                                                                                                                                                                                                                                  |                                                                                                                                                                                                                                                                                                                                                                                                                                                                       |
| Participant characteristics | <ul style="list-style-type: none"> <li>• No. of subjects: 86 AA</li> <li>• Age: <math>32.21 \pm 9.60</math> years</li> <li>• Gender: Female 30 (42%)</li> <li>• Ethnicity: N/A</li> <li>• BMI: <math>22.2 \pm 2.0</math> kg/m<sup>2</sup></li> <li>• Comorbidity: N/A</li> <li>• Smoking: N/A</li> <li>• Alcohol: N/A</li> <li>• Skin type: N/A</li> <li>• Diet: N/A</li> <li>• Sun-exposure/ sunscreen usage: N/A</li> <li>• Disease duration: <math>11.74 \pm 29.85</math> months</li> <li>• Disease severity score/grading: SALT (%) <math>14.41 \pm 9.92</math>, SALT class; S1 = 41 (83%), S2 = 15 (17%)</li> <li>• Alopecia pattern: 51 (59.3%) multiple patches, 35 (40.7%) single patch</li> <li>• FH of alopecia: N/A</li> <li>• Nail involvement: N/A</li> <li>• First/ recurrent episode: old 50 (58%), new 36 (42%)</li> <li>• Stable/ active disease: N/A</li> <li>• Treatment information: N/A</li> <li>• Diagnosis and severity assessment: Dermatology Department</li> </ul> | <ul style="list-style-type: none"> <li>• No. of subjects: 58 healthy controls (age- and sex-matched)</li> <li>• Age: <math>32.55 \pm 9.78</math> years</li> <li>• Gender: Female 24 (41.38%)</li> <li>• Ethnicity: N/A</li> <li>• BMI: <math>22.3 \pm 1.6</math> kg/m<sup>2</sup></li> <li>• Comorbidity: N/A</li> <li>• Smoking: N/A</li> <li>• Alcohol: N/A</li> <li>• Skin type: N/A</li> <li>• Diet: N/A</li> <li>• Sun-exposure/ sunscreen usage: N/A</li> </ul> |
| Vitamin D data              | <ul style="list-style-type: none"> <li>• VDD: 78 (90.7%)</li> <li>• Level: <math>11.84 \pm 6.18</math> ng/ml</li> <li>• Correlation: vitamin D level and SALT scores, <math>r = -0.409</math>, <math>p\text{-value} &lt; 0.001</math></li> </ul>                                                                                                                                                                                                                                                                                                                                                                                                                                                                                                                                                                                                                                                                                                                                             | <ul style="list-style-type: none"> <li>• VDD: 19 (32.8%)</li> <li>• Level: <math>23.57 \pm 9.03</math> ng/ml</li> </ul>                                                                                                                                                                                                                                                                                                                                               |
| Vitamin D measurement       | <ul style="list-style-type: none"> <li>• Definition: VDD: <math>\leq 20</math> ng/mL</li> <li>• Measurement method: liquid chromatography/tandem mass spectrometry (Quattro Premier XE; Waters, Milford, MA, U.S.A.)</li> </ul>                                                                                                                                                                                                                                                                                                                                                                                                                                                                                                                                                                                                                                                                                                                                                              |                                                                                                                                                                                                                                                                                                                                                                                                                                                                       |
| Other                       | <ul style="list-style-type: none"> <li>• Exclusion criteria: patients with a history of topical or systemic treatment (corticosteroids, intralesional steroid injection, immunosuppressive therapy, vitamin D or calcium supplementation, bisphosphonates, hepatic enzyme inducers and cholesterol-lowering drugs) within 4 weeks of the study; patients receiving phototherapy within 6 months of the study; patients with a history of DM, anaemia, thyroid disorders, autoimmune diseases (including SLE, RA, psoriasis, MS and IBD) and atopy (including atopic dermatitis and asthma), and patients with both vitiligo and AA, parathyroid disorders, chronic renal or liver disease or malignancy; pregnant or lactating women, smokers and patients applying sunscreen; all participants with a body mass index <math>&gt; 25</math> kg/m<sup>2</sup></li> </ul>                                                                                                                      |                                                                                                                                                                                                                                                                                                                                                                                                                                                                       |



|                             |                                                                                                                                                                                                                                                                                                                                                                                                                                                                                                                                                                                                                                                                                                                                                                                                                                                                                                                                                                                                                                                            |                                                                                                                                                                                                                                                                                                                                                                                                                                                                                                                                |
|-----------------------------|------------------------------------------------------------------------------------------------------------------------------------------------------------------------------------------------------------------------------------------------------------------------------------------------------------------------------------------------------------------------------------------------------------------------------------------------------------------------------------------------------------------------------------------------------------------------------------------------------------------------------------------------------------------------------------------------------------------------------------------------------------------------------------------------------------------------------------------------------------------------------------------------------------------------------------------------------------------------------------------------------------------------------------------------------------|--------------------------------------------------------------------------------------------------------------------------------------------------------------------------------------------------------------------------------------------------------------------------------------------------------------------------------------------------------------------------------------------------------------------------------------------------------------------------------------------------------------------------------|
| Mahamid et al. (2014)       |                                                                                                                                                                                                                                                                                                                                                                                                                                                                                                                                                                                                                                                                                                                                                                                                                                                                                                                                                                                                                                                            |                                                                                                                                                                                                                                                                                                                                                                                                                                                                                                                                |
| Study characteristics       | <ul style="list-style-type: none"> <li>• Study type: prospective, case-control, single-center study</li> <li>• Study duration: March 2010 to May 2011 (winter and summer)</li> <li>• Country: Israel</li> </ul>                                                                                                                                                                                                                                                                                                                                                                                                                                                                                                                                                                                                                                                                                                                                                                                                                                            |                                                                                                                                                                                                                                                                                                                                                                                                                                                                                                                                |
| Participant characteristics | <ul style="list-style-type: none"> <li>• No. of subjects: 23 AA</li> <li>• Age: <math>24.2 \pm 12.3</math> years</li> <li>• Gender: female 9 (39.13%)</li> <li>• Ethnicity: N/A</li> <li>• Disease duration <math>1.3 \pm 1.4</math> years</li> <li>• BMI: <math>22.3 \pm 4.7</math> kg/m<sup>2</sup></li> <li>• Comorbidity: N/A</li> <li>• Smoking: N/A</li> <li>• Alcohol: N/A</li> <li>• Skin type: N/A</li> <li>• Diet: N/A</li> <li>• Sun-exposure/ sunscreen usage: N/A</li> <li>• Disease duration: N/A</li> <li>• Disease severity score/grading: N/A</li> <li>• Alopecia pattern: Patchy 18, extensive 5 (21.74 %)</li> <li>• FH of alopecia: N/A</li> <li>• Nail involvement: N/A</li> <li>• First/ recurrent episode: N/A</li> <li>• Stable/ active disease: N/A</li> <li>• Treatment information: N/A</li> <li>• Diagnosis and severity assessment: two senior dermatologists according to the clinical evaluation. If the diagnosis was not clear after clinical evaluation, a skin biopsy was performed to confirm the diagnosis</li> </ul> | <ul style="list-style-type: none"> <li>• No. of subjects: 20 controls without a history of AA who were enrolled randomly from the clinics (age- and gender-matched)</li> <li>• Age: <math>27 \pm 11.26</math> years</li> <li>• Gender: female 7 (35%)</li> <li>• Ethnicity: N/A</li> <li>• BMI: <math>23.1 \pm 3.2</math> kg/m<sup>2</sup></li> <li>• Comorbidity: N/A</li> <li>• Smoking: N/A</li> <li>• Alcohol: N/A</li> <li>• Skin type: N/A</li> <li>• Diet: N/A</li> <li>• Sun-exposure/ sunscreen usage: N/A</li> </ul> |
| Vitamin D data              | <ul style="list-style-type: none"> <li>• VDD: 16 (69.5%)</li> <li>• Level: <math>11.32 \pm 10.18</math> ng/ml</li> <li>• Correlation: N/A</li> </ul>                                                                                                                                                                                                                                                                                                                                                                                                                                                                                                                                                                                                                                                                                                                                                                                                                                                                                                       | <ul style="list-style-type: none"> <li>• VDD: 5 (25%)</li> <li>• Level: <math>21.55 \pm 13.62</math> ng/ml</li> </ul>                                                                                                                                                                                                                                                                                                                                                                                                          |
| Vitamin D measurement       | <ul style="list-style-type: none"> <li>• Definition: VDD &lt; 20 ng/ml, VDI &lt; 30 ng/ml</li> <li>• Measurement method: Commercial enzyme immunoassay, measured in the winter and summer seasons due to previous data that showed a seasonal variability</li> </ul>                                                                                                                                                                                                                                                                                                                                                                                                                                                                                                                                                                                                                                                                                                                                                                                       |                                                                                                                                                                                                                                                                                                                                                                                                                                                                                                                                |
| Other                       | <ul style="list-style-type: none"> <li>• Exclusion criteria: patients with other skin disorders and/or another cause of alopecia (tinea capitis, trichotillomania, androgenic alopecia, scarring alopecia, traction alopecia, secondary syphilis, telogen effluvium, female androgenic alopecia), as well as patients with autoimmune or systemic diseases (SLE, rheumatic arthritis, scleroderma, thyroiditis, hyperthyroidism, hypothyroidism)</li> </ul>                                                                                                                                                                                                                                                                                                                                                                                                                                                                                                                                                                                                |                                                                                                                                                                                                                                                                                                                                                                                                                                                                                                                                |

| Moneib et al. (2014)        |                                                                                                                                                                                                                                                                                                                                                                                                                                                                                                                                                                                                                                                                                                                                                                                                                                                                                                                                                                                                      |                                                                                                                                                                                                                                                                                                                                                                                                                                                                         |
|-----------------------------|------------------------------------------------------------------------------------------------------------------------------------------------------------------------------------------------------------------------------------------------------------------------------------------------------------------------------------------------------------------------------------------------------------------------------------------------------------------------------------------------------------------------------------------------------------------------------------------------------------------------------------------------------------------------------------------------------------------------------------------------------------------------------------------------------------------------------------------------------------------------------------------------------------------------------------------------------------------------------------------------------|-------------------------------------------------------------------------------------------------------------------------------------------------------------------------------------------------------------------------------------------------------------------------------------------------------------------------------------------------------------------------------------------------------------------------------------------------------------------------|
| Study characteristics       | <ul style="list-style-type: none"> <li>• Study type: case-control, single-center study</li> <li>• Study duration: February to May</li> <li>• Country: Egypt</li> </ul>                                                                                                                                                                                                                                                                                                                                                                                                                                                                                                                                                                                                                                                                                                                                                                                                                               |                                                                                                                                                                                                                                                                                                                                                                                                                                                                         |
| Participant characteristics | <ul style="list-style-type: none"> <li>• No. of subjects: 60 FPHL</li> <li>• Age: <math>28.67 \pm 10</math> years</li> <li>• Gender: Female 60 (100 %)</li> <li>• Ethnicity: N/A</li> <li>• BMI: N/A</li> <li>• Comorbidity: N/A</li> <li>• Smoking: N/A</li> <li>• Alcohol: N/A</li> <li>• Skin type: N/A</li> <li>• Diet: N/A</li> <li>• Sun-exposure/ sunscreen usage: N/A</li> <li>• Disease duration: <math>3.63 \pm 2.59</math> years (calculated)</li> <li>• Disease severity score/grading: Ludwig classification degree I 34 (56.67%), degree II 22 (36.67%), degree III 4 (6.67%)</li> <li>• Alopecia pattern: N/A</li> <li>• FH of alopecia: 37 (61.67%) no family history, 23 (38.33%) with family history</li> <li>• Nail involvement: N/A</li> <li>• First/ recurrent episode: N/A</li> <li>• Stable/ active disease: N/A</li> <li>• Treatment information: N/A</li> <li>• Diagnosis and severity assessment: dermatology outpatient clinic, Ain Shams University Hospital.</li> </ul> | <ul style="list-style-type: none"> <li>• No. of subjects: 60 controls (age-, gender-, skin type-, socioeconomic status-, outdoor exposure-matched)</li> <li>• Age: <math>24.8 \pm 6</math> years</li> <li>• Gender: Female 60 (100 %)</li> <li>• Ethnicity: N/A</li> <li>• BMI: N/A</li> <li>• Comorbidity: N/A</li> <li>• Smoking: N/A</li> <li>• Alcohol: N/A</li> <li>• Skin type: N/A</li> <li>• Diet: N/A</li> <li>• Sun-exposure/ sunscreen usage: N/A</li> </ul> |
| Vitamin D data              | <ul style="list-style-type: none"> <li>• VDD: 47 (78.3%)</li> <li>• VDI: 11 (18.3%)</li> <li>• Normal 2 (3.3%)</li> <li>• Level: <math>14.2 \pm 7.31</math> ng/ml</li> <li>• Correlation: N/A</li> </ul>                                                                                                                                                                                                                                                                                                                                                                                                                                                                                                                                                                                                                                                                                                                                                                                             | <ul style="list-style-type: none"> <li>• VDD: 9 (15%)</li> <li>• VDI: 0 (0%)</li> <li>• Normal 51 (85.0%)</li> <li>• Level: <math>45.90 \pm 18.83</math> ng/ml</li> </ul>                                                                                                                                                                                                                                                                                               |
| Vitamin D measurement       | <ul style="list-style-type: none"> <li>• Definition: VDD: &lt;20 ng/ml, VDI: 21–29 ng/ml, normal &gt;30 ng/ml</li> <li>• Measurement method: radioimmunoassay technique</li> </ul>                                                                                                                                                                                                                                                                                                                                                                                                                                                                                                                                                                                                                                                                                                                                                                                                                   |                                                                                                                                                                                                                                                                                                                                                                                                                                                                         |
| Other                       | <ul style="list-style-type: none"> <li>• Exclusion criteria: participants suffering from other scalp hair disorders whether primary (e.g. TE, alopecia areata, trichotillomania, tinea capitis, and traction alopecia) or secondary (e.g. seborrheic dermatitis, psoriasis), participants with hyperandrogenemia, showing clinically (e.g. hirsutism, menstrual irregularities, and polycystic ovary) or by laboratory investigations (e.g. elevated free testosterone, elevated serum dehydroepiandrosterone sulfate), participants taking any drugs that could alter serum vitamin D levels</li> </ul>                                                                                                                                                                                                                                                                                                                                                                                             |                                                                                                                                                                                                                                                                                                                                                                                                                                                                         |

|  |                                                                                                                                                                                                                                                 |
|--|-------------------------------------------------------------------------------------------------------------------------------------------------------------------------------------------------------------------------------------------------|
|  | (e.g. systemic corticosteroids, contraceptives, antiepileptic drugs, weight loss drugs, and cholesterol-lowering drugs), and participants suffering from malabsorption disorders, nutritional deficiencies, or kidney, liver, or bone diseases. |
|--|-------------------------------------------------------------------------------------------------------------------------------------------------------------------------------------------------------------------------------------------------|

|                             |                                                                                                                                                                                                                                                                                                                                                                                                                                                                                                                                                                                                                                                                                                                                                                                                                                                                                                                                                    |                                                                                                                                                                                                                                                                                                                                                                                                   |
|-----------------------------|----------------------------------------------------------------------------------------------------------------------------------------------------------------------------------------------------------------------------------------------------------------------------------------------------------------------------------------------------------------------------------------------------------------------------------------------------------------------------------------------------------------------------------------------------------------------------------------------------------------------------------------------------------------------------------------------------------------------------------------------------------------------------------------------------------------------------------------------------------------------------------------------------------------------------------------------------|---------------------------------------------------------------------------------------------------------------------------------------------------------------------------------------------------------------------------------------------------------------------------------------------------------------------------------------------------------------------------------------------------|
| D'Ovidio et al. (2013)      |                                                                                                                                                                                                                                                                                                                                                                                                                                                                                                                                                                                                                                                                                                                                                                                                                                                                                                                                                    |                                                                                                                                                                                                                                                                                                                                                                                                   |
| Study characteristics       | <ul style="list-style-type: none"> <li>• Study type: case-control, single-center study</li> <li>• Study duration: October to March of 2010 to 2012 (autumn/winter)</li> <li>• Country: Italy</li> </ul>                                                                                                                                                                                                                                                                                                                                                                                                                                                                                                                                                                                                                                                                                                                                            |                                                                                                                                                                                                                                                                                                                                                                                                   |
| Participant characteristics | <ul style="list-style-type: none"> <li>• No. of subjects: 156 AA (&gt;25% scalp area)</li> <li>• Age: mean 37.8 years</li> <li>• Gender: Female 111, male 45</li> <li>• Ethnicity: N/A</li> <li>• BMI: N/A</li> <li>• Comorbidity: N/A</li> <li>• Smoking: N/A</li> <li>• Alcohol: N/A</li> <li>• Skin type: N/A</li> <li>• Diet: N/A</li> <li>• Sun-exposure/ sunscreen usage: N/A</li> <li>• Disease duration: 49 (6-20) months</li> <li>• Disease severity score/grading: N/A</li> <li>• Alopecia pattern: AA multilocularis 49 (31.5%), Ophiasis 69 (44%), AT/AU 38 (24.5%)</li> <li>• FH of alopecia: 42% with family history</li> <li>• Nail involvement: N/A</li> <li>• First/ recurrent episode: N/A</li> <li>• Stable/ active disease: 57% active, 43% in stationary/remission phase</li> <li>• Treatment information: N/A</li> <li>• Diagnosis and severity assessment: disease activity evaluated by perilesional trichogram</li> </ul> | <ul style="list-style-type: none"> <li>• No. of subjects: 148 unmatched healthy controls</li> <li>• Age: mean 34.5 years</li> <li>• Gender: Female 130, Male 18</li> <li>• Ethnicity: N/A</li> <li>• BMI: N/A</li> <li>• Comorbidity: N/A</li> <li>• Smoking: N/A</li> <li>• Alcohol: N/A</li> <li>• Skin type: N/A</li> <li>• Diet: N/A</li> <li>• Sun-exposure/ sunscreen usage: N/A</li> </ul> |
| Vitamin D data              | <ul style="list-style-type: none"> <li>• VDD: 42.4%</li> <li>• Level: N/A</li> <li>• Correlation: decreased level of 25OHD was not correlated with pattern or extent of hair loss.</li> </ul>                                                                                                                                                                                                                                                                                                                                                                                                                                                                                                                                                                                                                                                                                                                                                      | <ul style="list-style-type: none"> <li>• VDD: 29.5%</li> <li>• Level: N/A</li> </ul>                                                                                                                                                                                                                                                                                                              |
| Vitamin D measurement       | <ul style="list-style-type: none"> <li>• Definition: VDD: &lt; 20 ng/ml</li> <li>• Measurement method: chemiluminescence assay of plasmatic 25(OH)D, autumn/winter periods</li> </ul>                                                                                                                                                                                                                                                                                                                                                                                                                                                                                                                                                                                                                                                                                                                                                              |                                                                                                                                                                                                                                                                                                                                                                                                   |
| Other                       | <ul style="list-style-type: none"> <li>• Exclusion criteria: N/A</li> </ul>                                                                                                                                                                                                                                                                                                                                                                                                                                                                                                                                                                                                                                                                                                                                                                                                                                                                        |                                                                                                                                                                                                                                                                                                                                                                                                   |

| El-Mongy et al. (2013)      |                                                                                                                                                                                                                                                                                                                                                                                                                                                                                                                                                                                                                                                                                                                                                                                                                                                                                                                                                                                           |                                                                                                                                                                                                                                                                                                                                                                                                         |
|-----------------------------|-------------------------------------------------------------------------------------------------------------------------------------------------------------------------------------------------------------------------------------------------------------------------------------------------------------------------------------------------------------------------------------------------------------------------------------------------------------------------------------------------------------------------------------------------------------------------------------------------------------------------------------------------------------------------------------------------------------------------------------------------------------------------------------------------------------------------------------------------------------------------------------------------------------------------------------------------------------------------------------------|---------------------------------------------------------------------------------------------------------------------------------------------------------------------------------------------------------------------------------------------------------------------------------------------------------------------------------------------------------------------------------------------------------|
| Study characteristics       | <ul style="list-style-type: none"> <li>• Study type: case-control, single-center study</li> <li>• Study duration: January 1, 2011 to June 30, 2011</li> <li>• Country: Egypt</li> </ul>                                                                                                                                                                                                                                                                                                                                                                                                                                                                                                                                                                                                                                                                                                                                                                                                   |                                                                                                                                                                                                                                                                                                                                                                                                         |
| Participant characteristics | <ul style="list-style-type: none"> <li>• No. of subjects: 70 AA</li> <li>• Age: <math>27.79 \pm 9.12</math> years</li> <li>• Gender: female 33 (47.1%)</li> <li>• Ethnicity: N/A</li> <li>• BMI: N/A</li> <li>• Comorbidity: N/A</li> <li>• Smoking: N/A</li> <li>• Alcohol: N/A</li> <li>• Skin type: N/A</li> <li>• Diet: N/A</li> <li>• Sun-exposure/ sunscreen usage: N/A</li> <li>• Disease duration: <math>29.63 \pm 43.43</math> months</li> <li>• Disease severity score/grading: SALT class; S1 = 30 (42.9%), S2 = 12 (17.1%), S3 + S4 + S5 = 28 (40.0%), mean SALT score 44.83 (calculated)</li> <li>• Alopecia pattern: patchy 49 (70.0%), AT/AU 21 (30.0%)</li> <li>• FH of alopecia: positive 6 (8.6%), negative 64 (91.4%)</li> <li>• Nail involvement: N/A</li> <li>• First/ recurrent episode: N/A</li> <li>• Stable/ active disease: N/A</li> <li>• Treatment information: N/A</li> <li>• Diagnosis and severity assessment: Outpatient Clinic of Dermatology</li> </ul> | <ul style="list-style-type: none"> <li>• No. of subjects: 70 healthy controls</li> <li>• Age: <math>30.49 \pm 11.06</math> years</li> <li>• Gender: female 26 (37.1%)</li> <li>• Ethnicity: N/A</li> <li>• BMI: N/A</li> <li>• Comorbidity: N/A</li> <li>• Smoking: N/A</li> <li>• Alcohol: N/A</li> <li>• Skin type: N/A</li> <li>• Diet: N/A</li> <li>• Sun-exposure/ sunscreen usage: N/A</li> </ul> |
| Vitamin D data              | <ul style="list-style-type: none"> <li>• VDD: 6 (8.6%)</li> <li>• VDI: 44 (62.9%)</li> <li>• Normal 20 (28.6%)</li> <li>• Level: <math>66.4 \pm 32.6</math> nmol/l → <math>26.56 \pm 13.04</math> ng/ml</li> <li>• Correlation: no positive correlation between serum 25-OH Vit D levels and duration of disease (p-value = 0.674), type (p-value = 0.140), severity of AA (p-value = 0.176) or family history (p-value = 0.589)</li> </ul>                                                                                                                                                                                                                                                                                                                                                                                                                                                                                                                                               | <ul style="list-style-type: none"> <li>• VDD: 5 (7.1%)</li> <li>• VDI: 31 (44.3%)</li> <li>• Normal 34 (48.6%)</li> <li>• Level: <math>84.2 \pm 55.9</math> nmol/l → <math>33.68 \pm 22.36</math> ng/ml</li> </ul>                                                                                                                                                                                      |
| Vitamin D measurement       | <ul style="list-style-type: none"> <li>• Definition: VDD: &lt;30 nmol/l (12 ng/ml), VDI: 30-75 nmol/l (12-30 ng/ml), normal &gt;75 nmol/l (&gt;30 ng/ml)</li> <li>• Measurement method: A direct enzyme-linked immunosorbent assay with the 25-Hydroxy Vitamin D Direct EIA kit purchased from Immunodiagnostic Systems Ltd (Stubenwald-Allee, Bensheim, Germany).</li> </ul>                                                                                                                                                                                                                                                                                                                                                                                                                                                                                                                                                                                                             |                                                                                                                                                                                                                                                                                                                                                                                                         |



|       |                                                                                                                                                                                                                                                                                                                                                                                                                                                                                                           |
|-------|-----------------------------------------------------------------------------------------------------------------------------------------------------------------------------------------------------------------------------------------------------------------------------------------------------------------------------------------------------------------------------------------------------------------------------------------------------------------------------------------------------------|
| Other | <ul style="list-style-type: none"><li>• Exclusion criteria: any patient known to have a state of vitamin D deficiency or a disease that could affect its level (e.g. renal diseases, cancers, Systemic Lupus Erythematosus or psoriasis) and those who were experiencing spontaneous regrowth of terminal hair at the time of presentation. Furthermore, any patient who was taking vitamin D supplementation, oral or topical, for the last 2 months or receiving PUVA treatment was excluded.</li></ul> |
|-------|-----------------------------------------------------------------------------------------------------------------------------------------------------------------------------------------------------------------------------------------------------------------------------------------------------------------------------------------------------------------------------------------------------------------------------------------------------------------------------------------------------------|

|                             |                                                                                                                                                                                                                                                                                                                                                                                                                                                                                                                                                                                                                                                                                                                                                                                                                                                                                                                                                                                                                                                     |                                                                                                                                                                                                                                                                                                                                                                                                         |
|-----------------------------|-----------------------------------------------------------------------------------------------------------------------------------------------------------------------------------------------------------------------------------------------------------------------------------------------------------------------------------------------------------------------------------------------------------------------------------------------------------------------------------------------------------------------------------------------------------------------------------------------------------------------------------------------------------------------------------------------------------------------------------------------------------------------------------------------------------------------------------------------------------------------------------------------------------------------------------------------------------------------------------------------------------------------------------------------------|---------------------------------------------------------------------------------------------------------------------------------------------------------------------------------------------------------------------------------------------------------------------------------------------------------------------------------------------------------------------------------------------------------|
| Nassiri et al. (2013)       |                                                                                                                                                                                                                                                                                                                                                                                                                                                                                                                                                                                                                                                                                                                                                                                                                                                                                                                                                                                                                                                     |                                                                                                                                                                                                                                                                                                                                                                                                         |
| Study characteristics       | <ul style="list-style-type: none"> <li>• Study type: case-control, single-center study</li> <li>• Study duration: September 2010 to March 2012</li> <li>• Country: Iran</li> </ul>                                                                                                                                                                                                                                                                                                                                                                                                                                                                                                                                                                                                                                                                                                                                                                                                                                                                  |                                                                                                                                                                                                                                                                                                                                                                                                         |
| Participant characteristics | <ul style="list-style-type: none"> <li>• No. of subjects: 28 AA</li> <li>• Age: <math>27.75 \pm 7.97</math> years</li> <li>• Gender: Female 9 (32.14%)</li> <li>• Ethnicity: N/A</li> <li>• BMI: N/A</li> <li>• Comorbidity: N/A</li> <li>• Smoking: N/A</li> <li>• Alcohol: N/A</li> <li>• Skin type: N/A</li> <li>• Diet: N/A</li> <li>• Sun-exposure/ sunscreen usage: N/A</li> <li>• Disease duration: median 6 (0.5-20) years</li> <li>• Disease severity score/grading: SALT (%); 0-24 = 6 (21.4%), 25-49 = 4 (14.3%), 50-74 = 1 (3.6%), and 100 = 17 (60.7%), mean SALT score 70.79 (calculated)</li> <li>• Alopecia pattern: patchy 10 (35.7 %), AT 8 (28.6 %), AU 9 (32.1%), and ophiasis 1 (3.6%).</li> <li>• FH of alopecia: positive 1 (3.57%)</li> <li>• Nail involvement: 10 (35.71%)</li> <li>• First/ recurrent episode: N/A</li> <li>• Stable/ active disease: 14 (50.00%)</li> <li>• Treatment information: N/A</li> <li>• Diagnosis and severity assessment: Diagnosis of AA of the scalp was made by a dermatologist</li> </ul> | <ul style="list-style-type: none"> <li>• No. of subjects: 44 healthy controls</li> <li>• Age <math>33.16 \pm 12.52</math> years</li> <li>• Gender: Female 28 (63.63%)</li> <li>• Ethnicity: N/A</li> <li>• BMI: N/A</li> <li>• Comorbidity: N/A</li> <li>• Smoking: N/A</li> <li>• Alcohol: N/A</li> <li>• Skin type: N/A</li> <li>• Diet: N/A</li> <li>• Sun-exposure/ sunscreen usage: N/A</li> </ul> |
| Vitamin D data              | <ul style="list-style-type: none"> <li>• VDD: 9 (31.1%)</li> <li>• VDI: 14 (50.0%)</li> <li>• Normal 5 (17.9%)</li> <li>• Level: N/A</li> <li>• Correlation: N/A</li> </ul>                                                                                                                                                                                                                                                                                                                                                                                                                                                                                                                                                                                                                                                                                                                                                                                                                                                                         | <ul style="list-style-type: none"> <li>• VDD: 23 (52.3%)</li> <li>• VDI: 20 (45.4%)</li> <li>• Normal 1 (2.3%)</li> <li>• Level: N/A</li> </ul>                                                                                                                                                                                                                                                         |
| Vitamin D measurement       | <ul style="list-style-type: none"> <li>• Definition: VDD: &lt;10 ng/ml, VDI: 10 to &lt;30 ng/ml, normal &gt;30ng/ml</li> <li>• Measurement method: LIAISON kits (Diasorin LIAISON, Stillwater, Mn, USA) and via automated chemiluminescence immunoassay (CLIA)</li> </ul>                                                                                                                                                                                                                                                                                                                                                                                                                                                                                                                                                                                                                                                                                                                                                                           |                                                                                                                                                                                                                                                                                                                                                                                                         |
| Other                       | <ul style="list-style-type: none"> <li>• Exclusion criteria: taking vitamin D or calcium supplements, frequent ingestion of alcohol, gastrointestinal problems, bone or renal disease, sarcoidosis, or any other metabolic and systemic disorder that could affect 25(OH)D3 absorption, metabolism, or serum</li> </ul>                                                                                                                                                                                                                                                                                                                                                                                                                                                                                                                                                                                                                                                                                                                             |                                                                                                                                                                                                                                                                                                                                                                                                         |

|  |                                                                                                                                                              |
|--|--------------------------------------------------------------------------------------------------------------------------------------------------------------|
|  | level, treatment by systemic or topical steroids, barbiturates, bisphosphonates, sulfasalazine, or receiving PUVA or NBUVB during the previous three months. |
|--|--------------------------------------------------------------------------------------------------------------------------------------------------------------|

|                             |                                                                                                                                                                                                                                                                                                                                                                                                                                                                                                                                                                                                                                                                                                                                                                   |                                                                                                                                                                                                                                                                                                                                                                                                                                                                                                                               |                                                                                                                                                                                                                                                                                                                                                                                                                                      |
|-----------------------------|-------------------------------------------------------------------------------------------------------------------------------------------------------------------------------------------------------------------------------------------------------------------------------------------------------------------------------------------------------------------------------------------------------------------------------------------------------------------------------------------------------------------------------------------------------------------------------------------------------------------------------------------------------------------------------------------------------------------------------------------------------------------|-------------------------------------------------------------------------------------------------------------------------------------------------------------------------------------------------------------------------------------------------------------------------------------------------------------------------------------------------------------------------------------------------------------------------------------------------------------------------------------------------------------------------------|--------------------------------------------------------------------------------------------------------------------------------------------------------------------------------------------------------------------------------------------------------------------------------------------------------------------------------------------------------------------------------------------------------------------------------------|
| Rasheed et al. (2013)       |                                                                                                                                                                                                                                                                                                                                                                                                                                                                                                                                                                                                                                                                                                                                                                   |                                                                                                                                                                                                                                                                                                                                                                                                                                                                                                                               |                                                                                                                                                                                                                                                                                                                                                                                                                                      |
| Study characteristics       | <ul style="list-style-type: none"> <li>• Study type: case-control, single-center study</li> <li>• Study duration: July 2011 to October 2011</li> <li>• Country: Egypt</li> </ul>                                                                                                                                                                                                                                                                                                                                                                                                                                                                                                                                                                                  |                                                                                                                                                                                                                                                                                                                                                                                                                                                                                                                               |                                                                                                                                                                                                                                                                                                                                                                                                                                      |
| Participant characteristics | <ul style="list-style-type: none"> <li>• No. of subjects: 42 CTE</li> <li>• Age: range 18 to 45 years</li> <li>• Gender: Female 42 (100 %)</li> <li>• Ethnicity: N/A</li> <li>• BMI: N/A</li> <li>• Comorbidity: N/A</li> <li>• Smoking: N/A</li> <li>• Alcohol: N/A</li> <li>• Skin type: N/A</li> <li>• Diet: N/A</li> <li>• Sun-exposure/ sunscreen usage: N/A</li> <li>• Disease duration: N/A</li> <li>• Disease severity score/ grading: N/A</li> <li>• Alopecia pattern: N/A</li> <li>• FH of alopecia: N/A</li> <li>• Nail involvement: N/A</li> <li>• First/ recurrent episode: N/A</li> <li>• Stable/ active disease: N/A</li> <li>• Treatment information: N/A</li> <li>• Diagnosis and severity assessment: Dermatology Outpatients Clinic</li> </ul> | <ul style="list-style-type: none"> <li>• No. of subjects: 38 FPHL</li> <li>• Age: range 18 to 45 years</li> <li>• Gender: Female 38 (100 %)</li> <li>• Ethnicity: N/A</li> <li>• BMI: N/A</li> <li>• Comorbidity: N/A</li> <li>• Smoking: N/A</li> <li>• Alcohol: N/A</li> <li>• Skin type: N/A</li> <li>• Diet: N/A</li> <li>• Sun-exposure/ sunscreen usage: N/A</li> <li>• Disease duration: N/A</li> <li>• Disease severity score/grading: N/A</li> <li>• Alopecia pattern: N/A</li> <li>• FH of alopecia: N/A</li> </ul> | <ul style="list-style-type: none"> <li>• No. of subjects: 40 healthy female controls (age- and SPT- matched)</li> <li>• Age: <math>30.8 \pm 8.56</math> years</li> <li>• Gender: Female 40 (100 %)</li> <li>• Ethnicity: N/A</li> <li>• BMI: N/A</li> <li>• Comorbidity: N/A</li> <li>• Smoking: N/A</li> <li>• Alcohol: N/A</li> <li>• Skin type: N/A</li> <li>• Diet: N/A</li> <li>• Sun-exposure/ sunscreen usage: N/A</li> </ul> |
| Vitamin D data              | <ul style="list-style-type: none"> <li>• VDD: 10 (23.8 %)</li> <li>• VDI: 32 (76.2 %)</li> <li>• Level: <math>23.9 \pm 38.5</math> nmol/l → <math>9.56 \pm 15.4</math> ng/ml</li> <li>• Correlation: N/A</li> </ul>                                                                                                                                                                                                                                                                                                                                                                                                                                                                                                                                               | <ul style="list-style-type: none"> <li>• VDD: 13 (34.2 %)</li> <li>• VDI: 25 (65.8 %)</li> <li>• Level: <math>29.1 \pm 8.5</math> nmol/l → <math>11.64 \pm 3.4</math> ng/ml</li> <li>• Correlation: N/A</li> </ul>                                                                                                                                                                                                                                                                                                            | <ul style="list-style-type: none"> <li>• VDD: 2 (5 %)</li> <li>• VDI: 9 (22.5 %)</li> <li>• Normal 29 (72.5%)</li> <li>• Level: <math>118.2 \pm 68.1</math> nmol/l → <math>47.28 \pm 27.24</math> ng/ml</li> </ul>                                                                                                                                                                                                                   |
| Vitamin D measurement       | <ul style="list-style-type: none"> <li>• Definition: VDD: &lt;25 nmol/l (10 ng/ml) and VDI: 25–75 nmol/l (10-30 ng/ml)</li> <li>• Measurement method: competitive enzyme immunoassay</li> </ul>                                                                                                                                                                                                                                                                                                                                                                                                                                                                                                                                                                   |                                                                                                                                                                                                                                                                                                                                                                                                                                                                                                                               |                                                                                                                                                                                                                                                                                                                                                                                                                                      |
| Other                       | <ul style="list-style-type: none"> <li>• Exclusion criteria: patients with less than 5 diagnostic criteria in one diagnosis to avoid overlap cases and the presence of any systemic and/or scalp disease that might be related to hair loss; subjects on medication that could be related to hair loss (e.g., anticoagulants, retinoids, anticonvulsants and antide-pressants); subjects receiving drugs containing vitamin D, iron or dietary</li> </ul>                                                                                                                                                                                                                                                                                                         |                                                                                                                                                                                                                                                                                                                                                                                                                                                                                                                               |                                                                                                                                                                                                                                                                                                                                                                                                                                      |

|  |                                                                                                                                                                                                                                                                               |
|--|-------------------------------------------------------------------------------------------------------------------------------------------------------------------------------------------------------------------------------------------------------------------------------|
|  | supplements; recent stressful events (i.e. within the last 6 months) like physiological stress, surgical trauma, high fever, chronic systemic illness, hemorrhage, emotional stress, pregnancy or the presence of an elevated level of CRP ( $\geq 4$ ); menopausal subjects. |
|--|-------------------------------------------------------------------------------------------------------------------------------------------------------------------------------------------------------------------------------------------------------------------------------|

|                             |                                                                                                                                                                                                                                                                                                                                                                                                                                                                                                                                                                                                                                                                                                                                                                                                                                                                                                                                         |                                                                                                                                                                                                                                                                                                                                                                                 |
|-----------------------------|-----------------------------------------------------------------------------------------------------------------------------------------------------------------------------------------------------------------------------------------------------------------------------------------------------------------------------------------------------------------------------------------------------------------------------------------------------------------------------------------------------------------------------------------------------------------------------------------------------------------------------------------------------------------------------------------------------------------------------------------------------------------------------------------------------------------------------------------------------------------------------------------------------------------------------------------|---------------------------------------------------------------------------------------------------------------------------------------------------------------------------------------------------------------------------------------------------------------------------------------------------------------------------------------------------------------------------------|
| Yilmaz et al. (2012)        |                                                                                                                                                                                                                                                                                                                                                                                                                                                                                                                                                                                                                                                                                                                                                                                                                                                                                                                                         |                                                                                                                                                                                                                                                                                                                                                                                 |
| Study characteristics       | <ul style="list-style-type: none"> <li>Study type: case-control, single-center study</li> <li>Study duration: June 2010 to September 2010</li> <li>Country: Turkey</li> </ul>                                                                                                                                                                                                                                                                                                                                                                                                                                                                                                                                                                                                                                                                                                                                                           |                                                                                                                                                                                                                                                                                                                                                                                 |
| Participant characteristics | <ul style="list-style-type: none"> <li>No. of subjects: 42 AA</li> <li>Age: <math>31.1 \pm 8.2</math> years</li> <li>Gender: Female 28 (66.67%)</li> <li>Ethnicity: N/A</li> <li>BMI: N/A</li> <li>Comorbidity: N/A</li> <li>Smoking: N/A</li> <li>Alcohol: N/A</li> <li>Skin type: N/A</li> <li>Diet: N/A</li> <li>Sun-exposure/ sunscreen usage: N/A</li> <li>Disease duration: N/A</li> <li>Disease severity score/grading: SALT class; S1 = 30 (71.4%), S2 = 6 (14.2%), S3 = 3 (7.4%), S4 = 2 (4.7%), S5 = 1 (2.3%), mean SALT score 25.13 (calculated)</li> <li>Alopecia pattern: patchy 34 (80.9%), ophiasis 6 (14.2%), totalis 2 (4.7%)</li> <li>FH of alopecia: N/A</li> <li>Nail involvement: N/A</li> <li>First/ recurrent episode: Old onset 11 (26.1 %), new 31 (73.8 %)</li> <li>Stable/ active disease: N/A</li> <li>Treatment information: N/A</li> <li>Diagnosis and severity assessment: dermatology clinic</li> </ul> | <ul style="list-style-type: none"> <li>No. of subjects: 42 healthy controls</li> <li>Age: <math>29.3 \pm 7.4</math> years</li> <li>Gender: Female 29 (69.05%)</li> <li>Ethnicity: N/A</li> <li>BMI: N/A</li> <li>Comorbidity: N/A</li> <li>Smoking: N/A</li> <li>Alcohol: N/A</li> <li>Skin type: N/A</li> <li>Diet: N/A</li> <li>Sun-exposure/ sunscreen usage: N/A</li> </ul> |
| Vitamin D data              | <ul style="list-style-type: none"> <li>VDD: 36 (85%)</li> <li>Level: <math>33.4 \pm 17.7</math> nmol/L → <math>13.4 \pm 7.1</math> ng/ml</li> <li>Correlation: no correlation was found between the concentrations of 25(OH)-D, 1,25(OH)2D3 and various clinical parameters including extent of the hair loss patch, disease duration, number of patches and nail involvement.</li> </ul>                                                                                                                                                                                                                                                                                                                                                                                                                                                                                                                                               | <ul style="list-style-type: none"> <li>VDD: N/A</li> <li>Level: <math>51.2 \pm 21.1</math> nmol → <math>20.5 \pm 8.4</math> ng/ml</li> </ul>                                                                                                                                                                                                                                    |
| Vitamin D measurement       | <ul style="list-style-type: none"> <li>Definition: <math>&lt;50</math> nmol/L (<math>&lt;20</math> ng/ml) was defined as vitamin D insufficient in the manuscript, however, VDD: is redefined as <math>&lt;20</math> ng/ml in our study</li> <li>Measurement method: ELISA, no seasonal variation in vitamin D concentration in Turkey</li> </ul>                                                                                                                                                                                                                                                                                                                                                                                                                                                                                                                                                                                       |                                                                                                                                                                                                                                                                                                                                                                                 |
| Other                       | <ul style="list-style-type: none"> <li>Selection criteria: N/A</li> </ul>                                                                                                                                                                                                                                                                                                                                                                                                                                                                                                                                                                                                                                                                                                                                                                                                                                                               |                                                                                                                                                                                                                                                                                                                                                                                 |

|                             |                                                                                                                                                                                                                                                                                                                                                                                                                                                                                                                                                                                                                                                                                                                                                                                                                                                   |                                                                                                                                                                                                                                                                                                                                                                                                        |
|-----------------------------|---------------------------------------------------------------------------------------------------------------------------------------------------------------------------------------------------------------------------------------------------------------------------------------------------------------------------------------------------------------------------------------------------------------------------------------------------------------------------------------------------------------------------------------------------------------------------------------------------------------------------------------------------------------------------------------------------------------------------------------------------------------------------------------------------------------------------------------------------|--------------------------------------------------------------------------------------------------------------------------------------------------------------------------------------------------------------------------------------------------------------------------------------------------------------------------------------------------------------------------------------------------------|
| Karadag et al. (2011)       |                                                                                                                                                                                                                                                                                                                                                                                                                                                                                                                                                                                                                                                                                                                                                                                                                                                   |                                                                                                                                                                                                                                                                                                                                                                                                        |
| Study characteristics       | <ul style="list-style-type: none"> <li>• Study type: case-control, single-center study</li> <li>• Study duration: November 2008 to March 2009 (winter, little exposure to UV light)</li> <li>• Country: Turkey</li> </ul>                                                                                                                                                                                                                                                                                                                                                                                                                                                                                                                                                                                                                         |                                                                                                                                                                                                                                                                                                                                                                                                        |
| Participant characteristics | <ul style="list-style-type: none"> <li>• No. of subjects: 63 TE (29 ATE, 34 CTE)</li> <li>• Age: <math>29.1 \pm 11.9</math> years</li> <li>• Gender: Female 63 (100%)</li> <li>• Ethnicity: N/A</li> <li>• BMI: N/A</li> <li>• Comorbidity: N/A</li> <li>• Smoking: N/A</li> <li>• Alcohol: N/A</li> <li>• Skin type: N/A</li> <li>• Diet: N/A</li> <li>• Sun-exposure/ sunscreen usage: N/A</li> <li>• Disease duration: N/A</li> <li>• Disease severity score/grading: N/A</li> <li>• Alopecia pattern: N/A</li> <li>• FH of alopecia: N/A</li> <li>• Nail involvement: N/A</li> <li>• First/ recurrent episode: N/A</li> <li>• Stable/ active disease: N/A</li> <li>• Treatment information: N/A</li> <li>• Diagnosis and severity assessment: dermatological examinations of all patients were performed by the same dermatologist</li> </ul> | <ul style="list-style-type: none"> <li>• No. of subjects: 50 controls without AA</li> <li>• Age: <math>28.4 \pm 9.4</math> years</li> <li>• Gender: Female 50 (100%)</li> <li>• Ethnicity: N/A</li> <li>• BMI: N/A</li> <li>• Comorbidity: N/A</li> <li>• Smoking: N/A</li> <li>• Alcohol: N/A</li> <li>• Skin type: N/A</li> <li>• Diet: N/A</li> <li>• Sun-exposure/ sunscreen usage: N/A</li> </ul> |
| Vitamin D data              | <ul style="list-style-type: none"> <li>• VDD: N/A</li> <li>• Level: <math>21.68 \pm 10.67</math> ng/ml</li> <li>• Correlation: N/A</li> </ul>                                                                                                                                                                                                                                                                                                                                                                                                                                                                                                                                                                                                                                                                                                     | <ul style="list-style-type: none"> <li>• VDD: N/A</li> <li>• Level: <math>15.6 \pm 15.8</math> ng/ml</li> </ul>                                                                                                                                                                                                                                                                                        |
| Vitamin D measurement       | <ul style="list-style-type: none"> <li>• Definition: N/A</li> <li>• Measurement method: radioimmunoassay (RIA)</li> </ul>                                                                                                                                                                                                                                                                                                                                                                                                                                                                                                                                                                                                                                                                                                                         |                                                                                                                                                                                                                                                                                                                                                                                                        |
| Other                       | <ul style="list-style-type: none"> <li>• Exclusion criteria: drug abuse, malignancy, hypercalcemia, hypocalcemia, hyperparathyroidism, functional renal or liver abnormalities, systemic lupus erythematosus, syphilis, and any condition causing fever, and patients who were on calcium-phosphorus modifying drugs</li> </ul>                                                                                                                                                                                                                                                                                                                                                                                                                                                                                                                   |                                                                                                                                                                                                                                                                                                                                                                                                        |
